# Supplementary material for: The effect of interventions targeting gut microbiota on depressive symptoms: a systematic review and meta-analysis
Source: PubMed Central journal article supplement — CMAJ Open. 2021 Dec 21;9(4):E1195–204. doi: 10.9778/cmajo.20200283 (PMC8695538; doi:10.9778/cmajo.20200283), 2021-12-21
Supplement: 2020-0283-1-at.pdf [file 2020-0283-1-at.pdf]

## Supplementary Appendix

Section 1: Protocol deviations

Section 2: Search strategies

Section 3: Validated mental health outcomes in identified literature

Section 4: Excluded studies

Section 5: Included study characteristics

Section 6: Studies presenting insufficient information for inclusion in meta-analysis

Section 7: Risk of Bias

## Section 1: Protocol deviations:

Although different to the registered PROSPERO protocol, much of this manuscript adheres to the submitted protocol, including the focus on effects of these interventions, focus on mental health outcomes assessed using validated measures, placebo comparator, data extraction, risk of bias assessment, and strategy for data synthesis. Although differences introduced through protocol deviations increase susceptibility to type I error in meta-analysis, both the protocol registered with PROSPERO and the completed manuscript are exploratory in nature. Neither was intended to provide definitive and conclusive measures of effect size. Given the rapid expansion and breadth of this body of literature, an iterative approach was required to ensure quality and relevance of this systematic review.

To ensure that all relevant literature capturing the effects of all gut-microbiota targeting interventions, a broad literature search was developed. Following abstract review and consultation with domain experts, we identified that the interventions of interest were: probiotics, prebiotics, synbiotics, para-probiotics, and fecal microbiota transplant.

Due to the numerous results encountered, and the focus on effects of these interventions, results were limited to randomized controlled trials only to support causal inference of effect. Even with this additional inclusion criteria, the results were too numerous and diverse to fit into a single manuscript. Therefore, this manuscript explores depressive symptom outcomes. A second manuscript exploring symptoms of all other outcomes (anxiety, cognition, psychosis, and a composite outcome) is being developed.

We had originally intended to stratify analysis by population groups: medical (individuals with a diagnosed medical condition), clinical (individuals with a diagnosis of a mental health condition), and community (individuals without a diagnosed condition). Upon consultation with expert psychiatrists, our approach was refined to focus on populations with depression/depressive symptoms at baseline versus those without. This approach was thought to be more relevant, and less likely to obscure important differences in the primary outcome.

## Section 2: Search strategies

### **Medline (OVID)**

**Search start date: 1946**

**Original Search Date: July 3, 2019**

**Updated on March 5, 2021**

**\*number of results are provided from searches up to March 4, 2021 in brackets following search terms**

1. exp actinobacteria/ (174059 results)
2. exp bacillus/ (68970 results)
3. exp bacteroidetes/ (25431 results)
4. exp bifidobacterium/ (6347 results)
5. exp enterococcus/ (20395 results)
6. fermentation/ (47510 results)
7. exp firmicutes/ (346925 results)
8. exp lactobacillaceae/ (31191 results)
9. lactobacillus/ (17014 results)
10. exp lactococcus/ (5318 results)
11. exp leuconostoc/ (1969 results)
12. exp microbiota/ (45516 results)
13. probiotics/ or prebiotics/ or synbiotics/ (21106 results)
14. exp saccharomyces cerevisiae proteins/ (49644 results)
15. exp saccharomyces cerevisiae/ (106249 results)
16. exp streptococcus/ (80581 results)
17. (acidophilus or alistipes or allobaculum or bacillus or bacteroides or betabacteri\* or bifidobacteri\* or blautia or boulardii or clostriales or deferribacteres or desulfovibrio or enterococcus or ferment\* or lachnospiraceae or lactobacill\* or lactobacteri\* or lactococcus or leuconostoc or leuconostoc or microbial or microbiome\* or microbiota\* or milk or mycobiome or oscillospira or periphyton or postbiotic\* or prebiotic\* or probiotic\* or psychobiotic\* or saccharomyces or streptococcus or synbiotic\* or yeast\* or yoghurt or yogourt or yogurt).tw,kf. (826229 results)
18. (((feces or faeces or fecal or faecal or stool or stools or bacteria or flora) adj2 (transplant\* or enema or infusion or instillation or reconstitution or implantation)) or FMT).tw,kf. (4403 results)
19. ((alimentary or bowel or colon or digestive or enteric or faecal or faeces or fecal or gastro\* or gut or intestinal or intestine\* or intestinal or protobiotic or stomach) adj3 (flora or bacteria or bacterium or microbe or microbes or microflora or microorganism)).tw,kf. (32716 results)
20. ("anti-bacterial agents" or ("anti-bacterial" adj3 "agents") or "antibiotics").tw,kf. (215419 results)
21. 1 or 2 or 3 or 4 or 5 or 6 or 7 or 8 or 9 or 10 or 11 or 12 or 13 or 14 or 15 or 16 or 17 or 18 or 19 or 20 (1361245 results)
22. exp anxiety disorders/ or anxiety/ (159631 results)
23. exp autism spectrum disorder/ (32659 results)
24. exp "bipolar and related disorders"/ (41664 results)
25. exp cognition disorders/ (100031 results)
26. exp dementia/ (174826 results)
27. depression/ (127659 results)
28. exp "Feeding and Eating Disorders"/ (31923 results)
29. exp mood disorders/ (126063 results)
30. exp Psychotic Disorders/ (53627 results)

Appendix 1, as supplied by the authors. Appendix to: Hofmeister M, Clement F, Patten S, et al. The effect of interventions targeting gut microbiota on depressive symptoms: a systematic review and meta-analysis. *CMAJ Open* 2021.

DOI:10.9778/cmajo.20200283. Copyright © 2021 The Author(s) or their employer(s). To receive this resource in an accessible format, please contact us at [cmajgroup@cmaj.ca](mailto:cmajgroup@cmaj.ca).

31. exp schizophrenia/ (107219 results)
32. mental disorders/ (167017 results)
33. exp neurocognitive disorders/ (268257 results)
34. rett syndrome/ (2671 results)
35. exp Stress Disorders, Traumatic/ or exp Stress, Psychological/ (172372 results)
36. (agoraphobia or alzheimer\* or anorexia or anxiety or asperger\* or autism or autistic or binge eating disorder or bulimia or combat disorder\* or dementia or depress\* or eating disorder\* or (Kanner\* adj syndrome) or manic or mania or mental retardation or obsessive compulsive or OCD or overinclusion or panic or paranoi\* or personality disorder\* or pervasive developmental disorder\* or phobia\* or phobic or PTSD or post-traumatic or posttraumatic or PPD or schizoaffective disorder or schizophrenia).tw,kf. (1105031 results)
37. ((affective or cognitive or cognition or mental or mood or neurocognitive or psychiatric or psychic or psychological or mental or cognitive or cognition) adj2 (disorder\* or disease\* or dysfunction or disturbance\* or illness or abnormality or problem\* or incompeten\* or defect\* or deficit or disability or impairment or insufficiency or symptom\*)).tw,kf. (326142 results)
38. ((bipolar adj (affective or disorder\* or illness)) or (manic adj (disorder\* or state\*))).tw,kf. (32818 results)
39. ((DSM IV or DSM V) adj3 (psychiatric or mental)).tw,kf. (1797)
40. 22 or 23 or 24 or 25 or 26 or 27 or 28 or 29 or 30 or 31 or 32 or 33 or 34 or 35 or 36 or 37 or 38 or 39 (1641606 results)
41. 21 and 40 (17234 results)
42. animals/ not human/ (4798670 results)
43. 41 not 42 (12930 results)
44. limit 43 to (english or french) (12012 results)
45. limit 44 to (comment or editorial or letter or news) (241 results)
46. 44 not 45 (11771 results)
47. limit 46 to case reports (950 results)
48. 46 not 47 (10821 results)

### **PsycINFO (OVID)**

**Search start date: 1806**

**Original Search Date: July 3, 2019**

**Updated on March 5, 2021**

1. (acidophilus or alistipes or allobaculum or bacillus or bacteroides or betabacteri\* or bifidobacteri\* or blautia or boulardii or clostriales or deferribacteres or desulfovibrio or enterococcus or ferment\* or lachnospiraceae or lactobacill\* or lactobacteri\* or lactococcus or leuconostoc or leukonostoc or microbial or microbiome\* or microbiota\* or milk or mycobiome or oscillospira or periphyton or postbiotic\* or prebiotic\* or probiotic\* or psychobiotic\* or saccharomyces or streptococcus or synbiotic\* or yeast\* or yoghurt or yogurt or yogurt).tw.
2. (((feces or faeces or fecal or faecal or stool or stools or bacteria or flora) adj2 (transplant\* or enema or infusion or instillation or reconstitution or implantation)) or FMT).tw.
3. ((alimentary or bowel or colon or digestive or enteric or faecal or faeces or fecal or gastro\* or gut or intestinal or intestine\* or intestinal or probiotic or stomach) adj3 (flora or bacteria or bacterium or microbe or microbes or microflora or microorganism)).tw.
4. ("anti-bacterial agents" or ("anti-bacterial" adj3 "agents") or "antibiotics").tw.
5. 1 or 2 or 3 or 4

Appendix 1, as supplied by the authors. Appendix to: Hofmeister M, Clement F, Patten S, et al. The effect of interventions targeting gut microbiota on depressive symptoms: a systematic review and meta-analysis. *CMAJ Open* 2021.

DOI:10.9778/cmajo.20200283. Copyright © 2021 The Author(s) or their employer(s). To receive this resource in an accessible format, please contact us at [cmajgroup@cmaj.ca](mailto:cmajgroup@cmaj.ca).

6. exp Anxiety Disorders/ or exp Anxiety/
7. exp Autism Spectrum Disorders/
8. exp Bipolar Disorder/
9. exp cognitive impairment/
10. exp major depression/
11. exp eating disorders/
12. exp Affective Disorders/
13. exp Schizophrenia/ or exp Psychosis/
14. Mental Disorders/
15. exp Posttraumatic Stress Disorder/
16. exp Psychological Stress/
17. (agoraphobia or alzheimer\* or anorexia or anxiety or asperger\* or autism or autistic or binge eating disorder or bulimia or combat disorder\* or dementia or depress\* or eating disorder\* or (Kanner\* adj syndrome) or manic or mania or mental retardation or obsessive compulsive or OCD or overinclusion or panic or paranoi\* or personality disorder\* or pervasive developmental disorder\* or phobia\* or phobic or PTSD or post-traumatic or posttraumatic or PPD or schizoaffective disorder or schizophrenia).tw.
18. ((affective or cognitive or cognition or mental or mood or neurocognitive or psychiatric or psychic or psychological or mental or cognitive or cognition) adj2 (disorder\* or disease\* or dysfunction or disturbance\* or illness or abnormality or problem\* or incompeten\* or defect\* or deficit or disability or impairment or insufficiency or symptom\*)).tw.
19. ((bipolar adj (affective or disorder\* or illness)) or (manic adj (disorder\* or state\*))).tw.
20. ((DSM IV or DSM V) adj3 (psychiatric or mental)).tw.
21. 6 or 7 or 8 or 9 or 10 or 11 or 12 or 13 or 14 or 15 or 16 or 17 or 18 or 19 or 20
22. 5 and 21
23. limit 22 to animal
24. limit 22 to (animal and human)
25. 23 not 24
26. 22 not 25
27. limit 26 to (english or french)
28. limit 27 to (abstract collection or "column/opinion" or "comment/reply" or editorial or interview or letter or review-book or review-media or review-software & other)
29. 27 not 28
30. limit 29 to ("0200 book" or "0240 authored book" or "0280 edited book" or "0300 encyclopedia" or "0400 dissertation abstract")
31. 29 not 30

### **EMBASE (OVID)**

**Search start date: 1974**

**Original Search Date: July 3, 2019**

**Updated on March 5, 2021**

1. exp actinobacteria/
2. exp Bacillus/
3. exp Bacteroidetes/
4. exp Bifidobacterium/
5. exp Enterococcus/
6. exp Firmicutes/

Appendix 1, as supplied by the authors. Appendix to: Hofmeister M, Clement F, Patten S, et al. The effect of interventions targeting gut microbiota on depressive symptoms: a systematic review and meta-analysis. *CMAJ Open* 2021.

DOI:10.9778/cmajo.20200283. Copyright © 2021 The Author(s) or their employer(s). To receive this resource in an accessible format, please contact us at [cmajgroup@cmaj.ca](mailto:cmajgroup@cmaj.ca).

7. exp Lactobacillaceae/
8. exp Lactobacillus/
9. exp Lactococcus/
10. exp Leuconostoc/
11. exp microflora/
12. probiotic agent/
13. prebiotic agent/
14. synbiotic agent/
15. exp "microbial products not classified elsewhere"/
16. Saccharomyces cerevisiae protein/
17. Saccharomyces cerevisiae/
18. exp Streptococcus/
19. (acidophilus or alistipes or allobaculum or bacillus or bacteroides or betabacteri\* or bifidobacteri\* or blautia or boulandii or clostriales or deferribacteres or desulfovibrio or enterococcus or ferment\* or lachnospiraceae or lactobacill\* or lactobacteri\* or lactococcus or leuconostoc or leukonostoc or microbial or microbiome\* or microbiota\* or milk or mycobium or oscillospira or periphyton or postbiotic\* or prebiotic\* or probiotic\* or psychobiotic\* or saccharomyces or streptococcus or synbiotic\* or yeast\* or yoghurt or yogurt).tw,kw.
20. (((feces or faeces or fecal or faecal or stool or stools or bacteria or flora) adj2 (transplant\* or enema or infusion or instillation or reconstitution or implantation)) or FMT).tw,kw.
21. ((alimentary or bowel or colon or digestive or enteric or faecal or faeces or fecal or gastro\* or gut or intestinal or intestine\* or intestinal or protobiotic or stomach) adj3 (flora or bacteria or bacterium or microbe or microbes or microflora or microorganism)).tw,kw.
22. ("anti-bacterial agents" or ("anti-bacterial" adj3 "agents") or "antibiotics").tw,kw.
23. 1 or 2 or 3 or 4 or 5 or 6 or 7 or 8 or 9 or 10 or 11 or 12 or 13 or 14 or 15 or 16 or 17 or 18 or 19 or 20 or 21 or 22
24. exp anxiety disorder/ or exp autism/
25. exp anxiety/
26. exp bipolar disorder/
27. exp cognitive defect/
28. exp dementia/
29. exp depression/
30. exp eating disorder/
31. exp mood disorder/
32. exp psychosis/
33. exp schizophrenia/
34. mental disease/
35. exp "disorders of higher cerebral function"/
36. posttraumatic stress disorder/
37. mental stress/
38. (agoraphobia or alzheimer\* or anorexia or anxiety or asperger\* or autism or autistic or binge eating disorder or bulimia or combat disorder\* or dementia or depress\* or eating disorder\* or (Kanner\* adj syndrome) or manic or mania or mental retardation or obsessive compulsive or OCD or overinclusion or panic or paranoi\* or personality disorder\* or pervasive developmental disorder\* or phobia\* or phobic or PTSD or post-traumatic or posttraumatic or PPD or schizoaffective disorder or schizophrenia).tw,kw.
39. ((affective or cognitive or cognition or mental or mood or neurocognitive or psychiatric or psychic or psychological or mental or cognitive or cognition) adj2 (disorder\* or disease\* or dysfunction or

- disturbance\* or illness or abnormality or problem\* or incompeten\* or defect\* or deficit or disability or impairment or insufficiency or symptom\*).tw,kw.
40. ((bipolar adj (affective or disorder\* or illness)) or (manic adj (disorder\* or state\*))).tw,kw.
41. ((DSM IV or DSM V) adj3 (psychiatric or mental)).tw,kw.
42. 24 or 25 or 26 or 27 or 28 or 29 or 30 or 31 or 32 or 33 or 34 or 35 or 36 or 37 or 38 or 39 or 40 or 41
43. 23 and 42
44. limit 43 to animal studies
45. limit 43 to (human and animal studies)
46. 44 not 45
47. 43 not 46
48. limit 47 to (english or french)
49. limit 48 to (conference abstract or editorial or letter)
50. 48 not 49
51. exp case study/
52. 50 not 51

### **Database of Abstracts of Reviews of Effects (DARE) (OVID)**

**1<sup>st</sup> Quarter 2016**

**Updated on March 5, 2021**

1. (acidophilus or alistipes or allobaculum or bacillus or bacteroides or betabacteri\* or bifidobacteri\* or blautia or boulardii or clostriales or deferribacteres or desulfovibrio or enterococcus or ferment\* or lachnospiraceae or lactobacill\* or lactobacteri\* or lactococcus or leuconostoc or leukonostoc or microbial or microbiome\* or microbiota\* or milk or mycobiome or oscillospira or periphyton or postbiotic\* or prebiotic\* or probiotic\* or psychobiotic\* or saccharomyces or streptococcus or synbiotic\* or yeast\* or yoghurt or yogourt or yogurt).tw,kf.
2. (((feces or faeces or fecal or faecal or stool or stools or bacteria or flora) adj2 (transplant\* or enema or infusion or instillation or reconstitution or implantation)) or FMT).tw,kf.
3. ((alimentary or bowel or colon or digestive or enteric or faecal or faeces or fecal or gastro\* or gut or intestinal or intestine\* or intestinal or probiotic or stomach) adj3 (flora or bacteria or bacterium or microbe or microbes or microflora or microorganism)).tw,kf.
4. ("anti-bacterial agents" or ("anti-bacterial" adj3 "agents") or "antibiotics").tw,kf.
5. (agoraphobia or alzheimer\* or anorexia or anxiety or asperger\* or autism or autistic or binge eating disorder or bulimia or combat disorder\* or dementia or depress\* or eating disorder\* or (Kanner\* adj syndrome) or manic or mania or mental retardation or obsessive compulsive or OCD or overinclusion or panic or paranoi\* or personality disorder\* or pervasive developmental disorder\* or phobia\* or phobic or PTSD or post-traumatic or posttraumatic or PPD or schizoaffective disorder or schizophrenia).tw,kf.
6. ((affective or cognitive or cognition or mental or mood or neurocognitive or psychiatric or psychic or psychological or mental or cognitive or cognition) adj2 (disorder\* or disease\* or dysfunction or disturbance\* or illness or abnormality or problem\* or incompeten\* or defect\* or deficit or disability or impairment or insufficiency or symptom\*).tw,kf.
7. ((bipolar adj (affective or disorder\* or illness)) or (manic adj (disorder\* or state\*))).tw,kf.
8. ((DSM IV or DSM V) adj3 (psychiatric or mental)).tw,kf.
9. 1 or 2 or 3 or 4

10. 5 or 6 or 7 or 8

11. 9 and 10

### **Cochrane Database of Systematic Reviews (OVID)**

**Search start date: 2005**

**Original Search Date: July 3, 2019**

**Updated on March 5, 2021**

1. (acidophilus or alistipes or allobaculum or bacillus or bacteroides or betabacteri\* or bifidobacteri\* or blautia or boulardii or clostriales or deferribacteres or desulfovibrio or enterococcus or ferment\* or lachnospiraceae or lactobacill\* or lactobacteri\* or lactococcus or leuconostoc or leukonostoc or microbial or microbiome\* or microbiota\* or milk or mycobiome or oscillospira or periphyton or postbiotic\* or prebiotic\* or probiotic\* or psychobiotic\* or saccharomyces or streptococcus or synbiotic\* or yeast\* or yoghurt or yogourt or yogurt).tw,kw.
2. (((feces or faeces or fecal or faecal or stool or stools or bacteria or flora) adj2 (transplant\* or enema or infusion or instillation or reconstitution or implantation)) or FMT).tw,kw.
3. ((alimentary or bowel or colon or digestive or enteric or faecal or faeces or fecal or gastro\* or gut or intestinal or intestine\* or intestinal or protobiotic or stomach) adj3 (flora or bacteria or bacterium or microbe or microbes or microflora or microorganism)).tw,kw.
4. ("anti-bacterial agents" or ("anti-bacterial" adj3 "agents") or "antibiotics").tw,kw.
5. (agoraphobia or alzheimer\* or anorexia or anxiety or asperger\* or autism or autistic or binge eating disorder or bulimia or combat disorder\* or dementia or depress\* or eating disorder\* or (Kanner\* adj syndrome) or manic or mania or mental retardation or obsessive compulsive or OCD or overinclusion or panic or paranoi\* or personality disorder\* or pervasive developmental disorder\* or phobia\* or phobic or PTSD or post-traumatic or posttraumatic or PPD or schizoaffective disorder or schizophrenia).tw,kw.
6. ((affective or cognitive or cognition or mental or mood or neurocognitive or psychiatric or psychic or psychological or mental or cognitive or cognition) adj2 (disorder\* or disease\* or dysfunction or disturbance\* or illness or abnormality or problem\* or incompeten\* or defect\* or deficit or disability or impairment or insufficiency or symptom\*)).tw,kw.
7. ((bipolar adj (affective or disorder\* or illness)) or (manic adj (disorder\* or state\*))).tw,kw.
8. ((DSM IV or DSM V) adj3 (psychiatric or mental)).tw,kw.
9. 1 or 2 or 3 or 4
10. 5 or 6 or 7 or 8
11. 9 and 10
12. limit 11 to (withdrawn records and protocols)
13. 11 not 12

### **Cochrane Controlled Register of Trials (CENTRAL) (OVID)**

**March 2021**

**Original Search Date: July 3, 2019**

**Updated on March 5, 2021**

1. exp actinobacteria/
2. exp bacillus/

Appendix 1, as supplied by the authors. Appendix to: Hofmeister M, Clement F, Patten S, et al. The effect of interventions targeting gut microbiota on depressive symptoms: a systematic review and meta-analysis. *CMAJ Open* 2021.

DOI:10.9778/cmajo.20200283. Copyright © 2021 The Author(s) or their employer(s). To receive this resource in an accessible format, please contact us at [cmajgroup@cmaj.ca](mailto:cmajgroup@cmaj.ca).



3. exp bacteroidetes/
4. exp bifidobacterium/
5. exp enterococcus/
6. fermentation/
7. firmicute.mp
8. exp lactobacillaceae/
9. lactobacillus/
10. exp lactococcus/
11. exp leuconostoc/
12. exp microbiota/
13. probiotics/ or prebiotics/ or synbiotics/
14. exp saccharomyces cerevisiae proteins/
15. exp saccharomyces cerevisiae/
16. exp streptococcus/
17. (acidophilus or alistipes or allobaculum or bacillus or bacteroides or betabacteri\* or bifidobacteri\* or blautia or boulardii or clostriales or deferribacteres or desulfovibrio or enterococcus or ferment\* or lachnospiraceae or lactobacill\* or lactobacteri\* or lactococcus or leuconostoc or leukonostoc or microbial or microbiome\* or microbiota\* or milk or mycobiome or oscillospira or periphyton or postbiotic\* or prebiotic\* or probiotic\* or psychobiotic\* or saccharomyces or streptococcus or synbiotic\* or yeast\* or yoghurt or yogourt or yogurt).tw,kw.
18. (((feces or faeces or fecal or faecal or stool or stools or bacteria or flora) adj2 (transplant\* or enema or infusion or instillation or reconstitution or implantation)) or FMT).tw,kw.
19. ((alimentary or bowel or colon or digestive or enteric or faecal or faeces or fecal or gastro\* or gut or intestinal or intestine\* or intestinal or protobiotic or stomach) adj3 (flora or bacteria or bacterium or microbe or microbes or microflora or microorganism)).tw,kw.
20. ("anti-bacterial agents" or ("anti-bacterial" adj3 "agents") or "antibiotics").tw,kw.
21. 1 or 2 or 3 or 4 or 5 or 6 or 7 or 8 or 9 or 10 or 11 or 12 or 13 or 14 or 15 or 16 or 17 or 18 or 19 or 20
22. exp anxiety disorders/ or anxiety/
23. exp autism spectrum disorder/
24. exp Bipolar Disorder/
25. exp cognition disorders/
26. exp dementia/
27. depression/
28. exp "Feeding and Eating Disorders"/
29. exp mood disorders/
30. exp Psychotic Disorders/
31. exp schizophrenia/
32. mental disorders/
33. neurocognitive disorder.mp
34. rett syndrome/
35. exp Stress Disorders, Traumatic/ or exp Stress, Psychological/
36. (agoraphobia or alzheimer\* or anorexia or anxiety or asperger\* or autism or autistic or binge eating disorder or bulimia or combat disorder\* or dementia or depress\* or eating disorder\* or (Kanner\* adj syndrome) or manic or mania or mental retardation or obsessive compulsive or OCD or overinclusion or

Appendix 1, as supplied by the authors. Appendix to: Hofmeister M, Clement F, Patten S, et al. The effect of interventions targeting gut microbiota on depressive symptoms: a systematic review and meta-analysis. *CMAJ Open* 2021.

DOI:10.9778/cmajo.20200283. Copyright © 2021 The Author(s) or their employer(s). To receive this resource in an accessible format, please contact us at [cmajgroup@cmaj.ca](mailto:cmajgroup@cmaj.ca).

panic or paranoi\* or personality disorder\* or pervasive developmental disorder\* or phobia\* or phobic or PTSD or post-traumatic or posttraumatic or PPD or schizoaffective disorder or schizophrenia).tw,kw.  
37. ((affective or cognitive or cognition or mental or mood or neurocognitive or psychiatric or psychic or psychological or mental or cognitive or cognition) adj2 (disorder\* or disease\* or dysfunction or disturbance\* or illness or abnormality or problem\* or incompeten\* or defect\* or deficit or disability or impairment or insufficiency or symptom\*)).tw,kw.  
38. ((bipolar adj (affective or disorder\* or illness)) or (manic adj (disorder\* or state\*))).tw,kw.  
39. ((DSM IV or DSM V) adj3 (psychiatric or mental)).tw,kw.  
40. 22 or 23 or 24 or 25 or 26 or 27 or 28 or 29 or 30 or 31 or 32 or 33 or 34 or 35 or 36 or 37 or 38 or 39  
41. 21 and 40  
42. animals/ not human/  
43. 41 not 42  
44. limit 43 to (english or french)

### Section 3: Validated mental health outcomes in identified literature

| Scale                                                                | Abbreviation | Validating Publication Citation                                                                                                                                                                                                                             |
|----------------------------------------------------------------------|--------------|-------------------------------------------------------------------------------------------------------------------------------------------------------------------------------------------------------------------------------------------------------------|
| Beck Depression Inventory                                            | BDI          | Schotte CKW, Maes M, Cluydts R, De Doncker D, Cosyns P. Construct validity of the Beck Depression Inventory in a depressive population. <i>Journal of Affective Disorders</i> . 1997;46(2):115-125.                                                         |
| Beck Depression Inventory-II                                         | BDI-2        | Steer RA, Ball R, Ranieri WF, Beck AT. Further Evidence for the Construct Validity of the Beck Depression Inventory-II with Psychiatric Outpatients. <i>Psychological Reports</i> . 1997;80(2):443-446.                                                     |
| Centre for Epidemiological Studies Depression Scale                  | CES-D        | Radloff LS. The CES-D Scale: A Self-Report Depression Scale for Research in the General Population. <i>Applied Psychological Measurement</i> . 1977;1(3):385-401.                                                                                           |
| Centre for Epidemiological Studies Depression Scale – Korean Version | Korean CES-D | Cho MJ, Kim KH. Use of the Center for Epidemiologic Studies Depression (CES-D) Scale in Korea. <i>The Journal of Nervous &amp; Mental Disease</i> . 1998;186(5):304-310.                                                                                    |
| Depression Anxiety Stress Scales – 21 Items, Depression Scale        | DASS21-D     | Henry JD, Crawford JR. The short-form version of the Depression Anxiety Stress Scales (DASS-21): Construct validity and normative data in a large non-clinical sample. <i>British Journal of Clinical Psychology</i> . 2005;44(2):227-239.                  |
| Depression Anxiety Stress Scales – 42 Items, Depression Scale        | DASS42-D     | Crawford JR, Henry JD. The Depression Anxiety Stress Scales (DASS): Normative data and latent structure in a large non-clinical sample. <i>British Journal of Clinical Psychology</i> . 2003;42(2):111-131.                                                 |
| Edinburgh Postnatal Depression Scale                                 | EPDS         | Adouard F, Glangeaud-Freudenthal NMC, Golse B. Validation of the Edinburgh postnatal depression scale (EPDS) in a sample of women with high-risk pregnancies in France. <i>Archives of Women's Mental Health</i> . 2005;8:89-95.                            |
| Geriatric Depression Scale – Short Form                              | GDS-SF       | Durmaz B, Soysal P, Ellidokuz H, Isik AT. Validity and reliability of geriatric depression scale-15 (short form) in Turkish older adults. <i>Northern Clinics of Istanbul</i> . 2018;5(3):216-220.                                                          |
| Geriatric Depression Scale – Korean Version                          | GDS-K        | Kim JY, Park JH, Lee JJ, Huh Y, Lee SB, Han SK, Choi SW, Lee DY, Kim KW, Woo JI. Standardization of the Korean version of the geriatric depression scale: reliability, validity, and factor structure. <i>Psychiatry investigation</i> . 2008;5(4):232–238. |
| Hospital Anxiety and Depression Scale – Depression Scale             | HADS-D       | Djukanovic I, Carlsson J, Årestedt K. Is the Hospital Anxiety and Depression Scale (HADS) a valid measure in a general population 65-80 years old? A psychometric evaluation study. <i>Health and Quality of Life Outcomes</i> . 2017;15(193):10.           |

|                                                  |          |                                                                                                                                                                                                                       |
|--------------------------------------------------|----------|-----------------------------------------------------------------------------------------------------------------------------------------------------------------------------------------------------------------------|
| Hamilton Depression Rating Scale                 | HAM-D    | Dozois DJA. The Psychometric Characteristics of the Hamilton Depression Inventory. <i>Journal of Personality Assessment</i> . 2003;80(1):31-40.                                                                       |
| Leiden Index of Depression Sensitivity - Revised | LEIDS-R  | Figuroa CA, Mocking RJT, Mahmoud GA, et al. The measurement of cognitive reactivity to sad mood in patients remitted from major depressive disorder. <i>British Journal of Clinical Psychology</i> . 2018;57:313-327. |
| Montgomery- Åsberg Depression Scale              | MADRS    | Davidson J, Turnbull CD, Strickland R, Miller R, Graves K. The Montgomery-Åsberg Depression Scale: reliability and validity. <i>Acta Psychiatrica Scandinavica</i> . 1986;73:544-548.                                 |
| Patient Health Questionnaire - 9                 | PHQ-9    | Martin A, Rief W, Klaiberg A, Braehler E. Validity of the Brief Patient Health Questionnaire Mood Scale (PHQ-9) in the general population. <i>General Hospital Psychiatry</i> . 2006;28:71-77.                        |
| Quick Inventory of Depressive Symptomatology     | QIDS     | Ma X-R, Hou C-L, Zang Y, et al. Could the Quick Inventory of Depressive Symptomatology-Self-Report (QIDS-SR) be used in depressed schizophrenia patients? <i>Journal of Affective Disorders</i> . 2015;172:191-194.   |
| Zung Self-Rating Depression Scale                | Zung SDS | Jegede RO. Psychometric Properties of the Self-Rating Depression Scale (SDS). <i>The Journal of Psychology</i> . 1976;93:27-30.                                                                                       |

## Section 4: Excluded studies

| Author Name                                  | Reason for Exclusion         |
|----------------------------------------------|------------------------------|
| Abbas et al. (2014) <sup>1</sup>             | Outcome not of interest      |
| Agahi et al. (2018) <sup>2</sup>             | Outcome not of interest      |
| Agosta et al. (2011) <sup>3</sup>            | Outcome not of interest      |
| Akbari et al. (2016) <sup>4</sup>            | Outcome not of interest      |
| Alipour et al. (2014) <sup>5</sup>           | Duplicate of included study  |
| Allaert et al. (2016) <sup>6</sup>           | Outcome not of interest      |
| Allen et al. (2016) <sup>7</sup>             | Outcome not of interest      |
| Arnold et al. (2018) <sup>8</sup>            | Conference proceeding        |
| Arteaga-Henríguez et al. (2020) <sup>9</sup> | Study design not of interest |
| Aydin et al. (2019) <sup>10</sup>            | Study design not of interest |
| Azpiroz et al. (2017) <sup>11</sup>          | Duplicate of included study  |
| Bambling et al. (2017) <sup>12</sup>         | Study design not of interest |
| Bannaga et al. (2017) <sup>13</sup>          | Conference proceeding        |
| Barthow et al. (2016) <sup>14</sup>          | Study design not of interest |
| Barthow et al. (2019) <sup>15</sup>          | Study design not of interest |
| Begtrup et al. (2013) <sup>16</sup>          | Outcome not of interest      |
| Benjamin et al. (2011) <sup>17</sup>         | Outcome not of interest      |
| Benton et al. (2007) <sup>18</sup>           | Outcome not of interest      |
| Blondel et al. (2018) <sup>19</sup>          | Study design not of interest |
| Buie et al. (2015) <sup>20</sup>             | Study design not of interest |
| Carlsson et al. (2009) <sup>21</sup>         | Outcome not of interest      |
| Caso et al. (2016) <sup>22</sup>             | Study design not of interest |
| Ceccarelli et al. (2017) <sup>23</sup>       | Outcome not of interest      |
| Ceccarelli et al. (2017) <sup>24</sup>       | Study design not of interest |
| Cepeda et al. (2017) <sup>25</sup>           | Study design not of interest |
| Chahwan et al. (2019) <sup>26</sup>          | Duplicate of included study  |
| Clapp et al. (2017) <sup>27</sup>            | Study design not of interest |
| Clark et al. (2016) <sup>28</sup>            | Study design not of interest |
| Colica et al. (2017) <sup>29</sup>           | Outcome not of interest      |
| Culpepper et al. (2016) <sup>30</sup>        | Outcome not of interest      |
| Dalile et al. (2020) <sup>31</sup>           | Intervention not of interest |
| Dapoigny et al. (2012) <sup>32</sup>         | Outcome not of interest      |
| Darbaky et al. (2017) <sup>33</sup>          | Not an adult population      |
| De Lorenzo et al. (2017) <sup>34</sup>       | Outcome not of interest      |
| Dickerson et al. (2014) <sup>35</sup>        | Duplicate of included study  |
| Dinan et al. (2011) <sup>36</sup>            | Study design not of interest |
| Dinan et al. (2018) <sup>37</sup>            | Study design not of interest |
| Diop et al. (2008) <sup>38</sup>             | Outcome not of interest      |
| Dubberke et al. (2016) <sup>39</sup>         | Outcome not of interest      |

Appendix 1, as supplied by the authors. Appendix to: Hofmeister M, Clement F, Patten S, et al. The effect of interventions targeting gut microbiota on depressive symptoms: a systematic review and meta-analysis. *CMAJ Open* 2021. DOI:10.9778/cmajo.20200283. Copyright © 2021 The Author(s) or their employer(s). To receive this resource in an accessible format, please contact us at [cmajgroup@cmaj.ca](mailto:cmajgroup@cmaj.ca).

|                                                 |                              |
|-------------------------------------------------|------------------------------|
| Dubinkina et al. (2017) <sup>40</sup>           | Study design not of interest |
| Dughera et al. (2007) <sup>41</sup>             | Outcome not of interest      |
| Eskandarzadeh et al. (2021) <sup>42</sup>       | Outcome not of interest      |
| Farhangi et al. (2018) <sup>43</sup>            | Outcome not of interest      |
| Feher et al. (2014) <sup>44</sup>               | Study design not of interest |
| Gerasimov et al. (2018) <sup>45</sup>           | Not an adult population      |
| Gertenrich et al. (1970) <sup>46</sup>          | Outcome not of interest      |
| Ghaderi et al. (2019) <sup>47</sup>             | Duplicate of included study  |
| Gomi et al. (2018) <sup>48</sup>                | Outcome not of interest      |
| Grimaldi et al. (2018) <sup>49</sup>            | Not an adult population      |
| Gualtieri et al. (2020) <sup>50</sup>           | Outcome not of interest      |
| Guglielmetti et al. (2011) <sup>51</sup>        | Outcome not of interest      |
| Gupta et al. (2021) <sup>52</sup>               | Outcome not of interest      |
| Guyonnet et al. (2007) <sup>53</sup>            | Outcome not of interest      |
| Han et al. (2017) <sup>54</sup>                 | Intervention not of interest |
| Hilimire et al. (2015) <sup>55</sup>            | Study design not of interest |
| Huang et al. (2019) <sup>56</sup>               | Comparator not of interest   |
| Hwang et al. (2019) <sup>57</sup>               | Outcome not of interest      |
| Itzhaki et al. (2016) <sup>58</sup>             | Study design not of interest |
| Jaatinen et al. (2014) <sup>59</sup>            | Intervention not of interest |
| Jacka et al. (2019) <sup>60</sup>               | Study design not of interest |
| Jamilian et al. (2021) <sup>61</sup>            | Outcome not of interest      |
| Jiang et al. (2018) <sup>62</sup>               | Outcome not of interest      |
| Jiang et al. (2019) <sup>63</sup>               | Study design not of interest |
| Jicha et al. (2015) <sup>64</sup>               | Conference proceeding        |
| Johnsen et al. (2020) <sup>65</sup>             | Outcome not of interest      |
| Julianelle et al. (1923) <sup>66</sup>          | Outcome not of interest      |
| Kao et al. (2017) <sup>67</sup>                 | Outcome not of interest      |
| Karadag et al. (2012) <sup>68</sup>             | Conference proceeding        |
| Karakula-Juchnowicz et al. (2019) <sup>69</sup> | Study design not of interest |
| Karbownik et al. (2020) <sup>70</sup>           | Outcome not of interest      |
| Kazemi et al. (2019) <sup>71</sup>              | Duplicate of included study  |
| Kazemi et al. (2020) <sup>72</sup>              | Outcome not of interest      |
| Kim et al. (2002) <sup>73</sup>                 | Outcome not of interest      |
| Kim et al. (2018) <sup>74</sup>                 | Study design not of interest |
| Kim et al. (2019) <sup>75</sup>                 | Outcome not of interest      |
| Kitaoka et al. (2009) <sup>76</sup>             | Outcome not of interest      |
| Kleiman et al. (2015) <sup>77</sup>             | Study design not of interest |
| Kleiman et al. (2017) <sup>78</sup>             | Study design not of interest |
| Kleiman et al. (2017) <sup>79</sup>             | Not an adult population      |
| Kobayashi et al. (2019) <sup>80</sup>           | Study design not of interest |

Appendix 1, as supplied by the authors. Appendix to: Hofmeister M, Clement F, Patten S, et al. The effect of interventions targeting gut microbiota on depressive symptoms: a systematic review and meta-analysis. *CMAJ Open* 2021. DOI:10.9778/cmajo.20200283. Copyright © 2021 The Author(s) or their employer(s). To receive this resource in an accessible format, please contact us at [cmajgroup@cmaj.ca](mailto:cmajgroup@cmaj.ca).

|                                                 |                              |
|-------------------------------------------------|------------------------------|
| Kreijkamp-Kaspers et al. (2004) <sup>81</sup>   | Intervention not of interest |
| Kretzschmar (2017) <sup>82</sup>                | Study design not of interest |
| Krug et al. (2019) <sup>83</sup>                | Conference proceeding        |
| Kurokawa et al. (2018) <sup>84</sup>            | Study design not of interest |
| Langkamp-Henken et al. (2015) <sup>85</sup>     | Outcome not of interest      |
| Lecerf (2018) <sup>86</sup>                     | Study design not of interest |
| Lee et al. (2014) <sup>87</sup>                 | Intervention not of interest |
| Legette et al. (2019) <sup>88</sup>             | Conference proceeding        |
| Liu et al. (2016) <sup>89</sup>                 | Outcome not of interest      |
| Lorenzo-Zuniga et al. (2014) <sup>90</sup>      | Outcome not of interest      |
| Ma et al. (2019) <sup>91</sup>                  | Study design not of interest |
| Makino et al. (2018) <sup>92</sup>              | Outcome not of interest      |
| Marcos et al. (2004) <sup>93</sup>              | Outcome not of interest      |
| Marotta et al. (2019) <sup>94</sup>             | Duplicate of included study  |
| Mazzawi et al. (2018) <sup>95</sup>             | Study design not of interest |
| Messaoudi et al. (2011) <sup>96</sup>           | Duplicate of included study  |
| Mi et al. (2015) <sup>97</sup>                  | Not an adult population      |
| Miyaoka et al. (2018) <sup>98</sup>             | Duplicate of included study  |
| Mohammadi et al. (2016) <sup>99</sup>           | Intervention not of interest |
| Moller et al. (2017) <sup>100</sup>             | Duplicate of included study  |
| Morita et al. (2016) <sup>101</sup>             | Outcome not of interest      |
| Morita et al. (2017) <sup>102</sup>             | Outcome not of interest      |
| Mucci et al. (2006) <sup>103</sup>              | Outcome not of interest      |
| Nagamine et al. (2018) <sup>104</sup>           | Outcome not of interest      |
| Nagamine et al. (2018) <sup>105</sup>           | Outcome not of interest      |
| Nakakita et al. (2016) <sup>106</sup>           | Outcome not of interest      |
| Nishida et al. (2017) <sup>107</sup>            | Outcome not of interest      |
| Nishihara et al. (2014) <sup>108</sup>          | Outcome not of interest      |
| Noorwali et al. (2017) <sup>109</sup>           | Conference proceeding        |
| Nova et al. (2006) <sup>110</sup>               | Not an adult population      |
| Okubo et al. (2019) <sup>111</sup>              | Study design not of interest |
| Ostlund-Lagerstrom et al. (2016) <sup>112</sup> | Duplicate of included study  |
| Park et al. (2019) <sup>113</sup>               | Outcome not of interest      |
| Park et al. (2020) <sup>114</sup>               | Comparator not of interest   |
| Paulsen et al. (2017) <sup>115</sup>            | Study design not of interest |
| Perez-Cornago et al. (2016) <sup>116</sup>      | Study design not of interest |
| Peter et al. (2018) <sup>117</sup>              | Study design not of interest |
| Prantera et al. (2002) <sup>118</sup>           | Outcome not of interest      |
| Quigley et al. (2009) <sup>119</sup>            | Study design not of interest |
| Rao et al. (2018) <sup>120</sup>                | Study design not of interest |
| Reale et al. (2012) <sup>121</sup>              | Outcome not of interest      |

Appendix 1, as supplied by the authors. Appendix to: Hofmeister M, Clement F, Patten S, et al. The effect of interventions targeting gut microbiota on depressive symptoms: a systematic review and meta-analysis. *CMAJ Open* 2021. DOI:10.9778/cmajo.20200283. Copyright © 2021 The Author(s) or their employer(s). To receive this resource in an accessible format, please contact us at [cmajgroup@cmaj.ca](mailto:cmajgroup@cmaj.ca).

|                                               |                              |
|-----------------------------------------------|------------------------------|
| Reininghaus et al. (2018) <sup>122</sup>      | Study design not of interest |
| Reininghaus et al. (2020) <sup>123</sup>      | Comparator not of interest   |
| Ren et al. (2020) <sup>124</sup>              | Intervention not of interest |
| Roman et al. (2017) <sup>125</sup>            | Study design not of interest |
| Rong et al. (2019) <sup>126</sup>             | Study design not of interest |
| Sanborn et al. (2018) <sup>127</sup>          | Study design not of interest |
| Sanborn et al. (2020) <sup>128</sup>          | Outcome not of interest      |
| Sashihara et al. (2013) <sup>129</sup>        | Outcome not of interest      |
| Schmidt et al. (2015) <sup>130</sup>          | Outcome not of interest      |
| Severance et al. (2016) <sup>131</sup>        | Study design not of interest |
| Severance et al. (2017) <sup>132</sup>        | Outcome not of interest      |
| Shafaghi et al. (2016) <sup>133</sup>         | Outcome not of interest      |
| Shinkai et al. (2013) <sup>134</sup>          | Outcome not of interest      |
| Siddiqui et al. (2013) <sup>135</sup>         | Study design not of interest |
| Singh et al. (2016) <sup>136</sup>            | Study design not of interest |
| Smith et al. (2015) <sup>137</sup>            | Outcome not of interest      |
| Soldi et al. (2019) <sup>138</sup>            | Outcome not of interest      |
| Stevenson et al. (2014) <sup>139</sup>        | Outcome not of interest      |
| Stokes et al. (2015) <sup>140</sup>           | Conference proceeding        |
| Takada et al. (2016) <sup>141</sup>           | Study design not of interest |
| Takada et al. (2017) <sup>142</sup>           | Study design not of interest |
| Talbott et al. (2018) <sup>143</sup>          | Conference proceeding        |
| Tamtaji et al. (2018) <sup>144</sup>          | Outcome not of interest      |
| Tazyman et al. (2015) <sup>145</sup>          | Outcome not of interest      |
| Tomasik et al. (2015) <sup>146</sup>          | Outcome not of interest      |
| Tran et al. (2019) <sup>147</sup>             | Outcome not of interest      |
| Tran et al. (2019) <sup>147</sup>             | Outcome not of interest      |
| Uemura et al. (2019) <sup>148</sup>           | Intervention not of interest |
| Urita et al. (2015) <sup>149</sup>            | Not an adult population      |
| Vaghef-Mehrabany et al. (2014) <sup>150</sup> | Outcome not of interest      |
| Vaghef-Mehrabany et al. (2016) <sup>151</sup> | Outcome not of interest      |
| Valles-Colomer et al. (2019) <sup>152</sup>   | Study design not of interest |
| Venkataraman et al. (2021) <sup>153</sup>     | Outcome not of interest      |
| Vulevic et al. (2018) <sup>154</sup>          | Outcome not of interest      |
| Wallace et al. (2018) <sup>155</sup>          | Conference proceeding        |
| Wallace et al. (2021) <sup>156</sup>          | Study design not of interest |
| Wang et al. (2018) <sup>157</sup>             | Outcome not of interest      |
| Wang et al. (2019) <sup>158</sup>             | Outcome not of interest      |
| Westfall et al. (2018) <sup>159</sup>         | Study design not of interest |
| Wilson et al. (2018) <sup>160</sup>           | Study design not of interest |
| Xia et al. (2018) <sup>161</sup>              | Outcome not of interest      |

Appendix 1, as supplied by the authors. Appendix to: Hofmeister M, Clement F, Patten S, et al. The effect of interventions targeting gut microbiota on depressive symptoms: a systematic review and meta-analysis. *CMAJ Open* 2021. DOI:10.9778/cmajo.20200283. Copyright © 2021 The Author(s) or their employer(s). To receive this resource in an accessible format, please contact us at [cmajgroup@cmaj.ca](mailto:cmajgroup@cmaj.ca).



|                                               |                              |
|-----------------------------------------------|------------------------------|
| Xiao et al. (2020) <sup>162</sup>             | Outcome not of interest      |
| Yang et al. (2016) <sup>163</sup>             | Outcome not of interest      |
| Yi et al. (2016) <sup>164</sup>               | Study design not of interest |
| Yuan et al. (2015) <sup>165</sup>             | Study design not of interest |
| Yuan et al. (2018) <sup>166</sup>             | Study design not of interest |
| Zamudio-Tiburcio et al. (2017) <sup>167</sup> | Not English or French        |
| Zhang et al. (2019) <sup>168</sup>            | Study design not of interest |

### References for Excluded Studies

1. Abbas Z, Yakoob J, Jafri W, et al. Cytokine and clinical response to *Saccharomyces boulardii* therapy in diarrhea-dominant irritable bowel syndrome: a randomized trial. *Eur J Gastroenterol Hepatol.* 2014;26:630-9.
2. Agahi A, Hamidi GA, Daneshvar R, et al. Does Severity of Alzheimer's Disease Contribute to Its Responsiveness to Modifying Gut Microbiota? A Double Blind Clinical Trial. *Front Neurol.* 2018;9:662.
3. Agosta C, Atlante M, Benvenuti C, et al. Randomized controlled study on clinical efficacy of isoflavones plus *Lactobacillus sporogenes*, associated or not with a natural anxiolytic agent in menopause. *Minerva Ginecologica.* 2011;63:11-7.
4. Akbari E, Asemi Z, Daneshvar Kakhaki R, et al. Effect of Probiotic Supplementation on Cognitive Function and Metabolic Status in Alzheimer's Disease: A Randomized, Double-Blind and Controlled Trial. *Frontiers in aging neuroscience.* 2016;8:256.
5. Alipour B, Homayouni-Rad A, Vaghef-Mehrabany E, et al. Effects of *Lactobacillus casei* supplementation on disease activity and inflammatory cytokines in rheumatoid arthritis patients: a randomized double-blind clinical trial. *Int J Rheum Dis.* 2014;17:519-27.
6. Allaert FA, Courau S, Forestier A. Effect of magnesium, probiotic, and vitamin food supplementation in healthy subjects with psychological stress and evaluation of a persistent effect after discontinuing intake. *Panminerva Medica.* 2016;58:263-70.
7. Allen AP, Hutch W, Borre YE, et al. *Bifidobacterium longum* 1714 as a translational psychobiotic: modulation of stress, electrophysiology and neurocognition in healthy volunteers. *Transl Psychiatry.* 2016;6:e939.
8. Arnold LE. Placebo-Controlled Pilot Data for Three Complementary/Alternative Treatments in Autism. *Journal of the american academy of child and adolescent psychiatry.* 2018;57:S117-.
9. Arteaga-Henriquez G, Rosales-Ortiz SK, Arias-Vasquez A, et al. Treating impulsivity with probiotics in adults (PROBIA): study protocol of a multicenter, double-blind, randomized, placebo-controlled trial. *Trials.* 2020;21:161.
10. Aydin MA, Agirbas EP, Aydin S. Can disruption of microbiota composition be the chemical basis of Parkinson's disease and schizophrenia? *Bmfh.* 2019;38:1-2.
11. Azpiroz F, Dubray C, Bernalier-Donadille A, et al. Effects of scFOS on the composition of fecal microbiota and anxiety in patients with irritable bowel syndrome: a randomized, double blind, placebo controlled study. *Neurogastroenterol Motil.* 2017;29.
12. Bambling M, Edwards SC, Hall S, Vitetta L. A combination of probiotics and magnesium orotate attenuate depression in a small SSRI resistant cohort: an intestinal anti-inflammatory response is suggested. *Inflammopharmacology.* 2017;25:271-4.

13. Bannaga A, Widlak MM, Tehami N, et al. Probiotics' effects on perception of health and bowel frequency: a double blind randomized placebo controlled clinical trial. *Gastroenterology*. 2017;152:S819-.
14. Barthow C, Wickens K, Stanley T, et al. The Probiotics in Pregnancy Study (PiP Study): rationale and design of a double-blind randomised controlled trial to improve maternal health during pregnancy and prevent infant eczema and allergy. *BMC Pregnancy Childbirth*. 2016;16:133.
15. Barthow C, Hood F, McKinlay E, et al. Food 4 Health - He Oranga Kai: Assessing the efficacy, acceptability and economic implications of *Lactobacillus rhamnosus* HN001 and beta-glucan to improve glycated haemoglobin, metabolic health, and general well-being in adults with pre-diabetes: study protocol for a 2 x 2 factorial design, parallel group, placebo-controlled randomized controlled trial, with embedded qualitative study and economic analysis. *Trials*. 2019;20:464.
16. Begtrup LM, de Muckadell OB, Kjeldsen J, Christensen RD, Jarbøl DE. Long-term treatment with probiotics in primary care patients with irritable bowel syndrome--a randomised, double-blind, placebo controlled trial. *Scand J Gastroenterol*. 2013;48:1127-35.
17. Benjamin JL, Hedin CRH, Koutsoumpas A, et al. Randomised, double-blind, placebo-controlled trial of fructo- oligosaccharides in active Crohn's disease. *Gut*. 2011;60:923-9.
18. Benton D, Williams C, Brown A. Impact of consuming a milk drink containing a probiotic on mood and cognition. *European Journal of Clinical Nutrition*. 2007;61:355-61.
19. Blondel N. Probiotics to prevent rehospitalization for manic decompensation in bipolar patients?. [French]. *Revue Medicale Suisse*. 2018;14:1316.
20. Buie T. Potential Etiologic Factors of Microbiome Disruption in Autism. *Clinical Therapeutics*. 2015;37:976-83.
21. Carlsson M, Gustafson Y, Haglin L, Eriksson S. The feasibility of serving liquid yoghurt supplemented with probiotic bacteria, *Lactobacillus rhamnosus* LB 21, and *Lactococcus lactis* L1A--a pilot study among old people with dementia in a residential care facility. *J Nutr Health Aging*. 2009;13:813-9.
22. Caso JR, Balanza-Martinez V, Palomo T, Garcia-Bueno B. The Microbiota and Gut-Brain Axis: Contributions to the Immunopathogenesis of Schizophrenia. *Current Pharmaceutical Design*. 2016;22:6122-33.
23. Ceccarelli G, Brenchley JM, Cavallari EN, et al. Impact of High-Dose Multi-Strain Probiotic Supplementation on Neurocognitive Performance and Central Nervous System Immune Activation of HIV-1 Infected Individuals. *Nutrients*. 2017;9:21.
24. Ceccarelli G, Fratino M, Selvaggi C, et al. A pilot study on the effects of probiotic supplementation on neuropsychological performance and microRNA-29a-c levels in antiretroviral-treated HIV-1-infected patients. *Brain and Behavior*. 2017;7:e00756.
25. Cepeda MS, Katz EG, Blacketer C. Microbiome-Gut-Brain Axis: Probiotics and Their Association With Depression. *J Neuropsychiatry Clin Neurosci*. 2017;29:39-44.
26. Chahwan B, Kwan S, Isik A, van Hemert S, Burke C, Roberts L. Gut feelings: A randomised, triple-blind, placebo-controlled trial of probiotics for depressive symptoms. *Journal of Affective Disorders*. 2019;253:317-26.
27. Clapp M, Aurora N, Herrera L, Bhatia M, Wilen E, Wakefield S. Gut microbiota's effect on mental health: The gut-brain axis. *Clin*. 2017;7:987.
28. Clark A, Mach N. Exercise-induced stress behavior, gut-microbiota-brain axis and diet: a systematic review for athletes. *Journal of the International Society of Sports Nutrition*. 2016;13:43.

29. Colica C, Avolio E, Bollero P, et al. Evidences of a New Psychobiotic Formulation on Body Composition and Anxiety. *Mediators of Inflammation*. 2017;2017:5650627.
30. Culpepper T, Christman MC, Nieves C, et al. Bifidobacterium bifidum R0071 decreases stress-associated diarrhoea-related symptoms and self-reported stress: A secondary analysis of a randomised trial. *Beneficial Microbes*. 2016;7:327-36.
31. Dalile B, Vervliet B, Bergonzelli G, Verbeke K, Van Oudenhove L. Colon-delivered short-chain fatty acids attenuate the cortisol response to psychosocial stress in healthy men: a randomized, placebo-controlled trial. *Neuropsychopharmacology*. 2020;45:2257-66.
32. Dapoigny M, Piche T, Ducrotte P, Lunaud B, Cardot JM, Bernalier-Donadille A. Efficacy and safety profile of LCR35 complete freeze-dried culture in irritable bowel syndrome: a randomized, double-blind study. *World Journal of Gastroenterology*. 2012;18:2067-75.
33. Darbaky Y, Evrard B, Patrier S, et al. Oral probiotic treatment of Lactobacillus rhamnosus Lcr35<sup></sup> prevents visceral hypersensitivity to a colonic inflammation and an acute psychological stress. *Journal of Applied Microbiology*. 2017;122:188-200.
34. De Lorenzo A, Costacurta M, Merra G, et al. Can psychobiotics intake modulate psychological profile and body composition of women affected by normal weight obese syndrome and obesity? A double blind randomized clinical trial. *J Transl Med*. 2017;15:135.
35. Dickerson FB, Stallings C, Origoni A, et al. Effect of probiotic supplementation on schizophrenia symptoms and association with gastrointestinal functioning: a randomized, placebo-controlled trial. *Prim Care Companion CNS Disord*. 2014;16.
36. Dinan TG, Quigley EM. Probiotics in the treatment of depression: Science or science fiction? *Australian and New Zealand Journal of Psychiatry*. 2011;45:1023-5.
37. Dinan TG, Cryan JF. Schizophrenia and the microbiome: Time to focus on the impact of antipsychotic treatment on the gut microbiota. *World Journal of Biological Psychiatry*. 2018;19:568-70.
38. Diop L, Guillou S, Durand H. Probiotic food supplement reduces stress-induced gastrointestinal symptoms in volunteers: a double-blind, placebo-controlled, randomized trial. *Nutrition Research*. 2008;28:1-5.
39. Dubberke E, Dubberke ER, Hardi R, et al. Safety and Durability of RBX2660 (Microbiota Suspension) for Recurrent Clostridium difficile Infection: Results of the PUNCH CD Study. *Clinical Infectious Diseases*. 2016;62:596-602.
40. Dubinkina VB, Tyakht AV, Odintsova VY, et al. Links of gut microbiota composition with alcohol dependence syndrome and alcoholic liver disease. *Microbiome*. 2017;5:141.
41. Dughera L, Elia C, Navino M, et al. Effects of symbiotic preparations on constipated irritable bowel syndrome symptoms. *Acta Biomedica de l'Ateneo Parmense*. 2007;78:111-6+50.
42. Eskandarzadeh S, Effatpanah M, Khosravi-Darani K, et al. Efficacy of a multispecies probiotic as adjunctive therapy in generalized anxiety disorder: a double blind, randomized, placebo-controlled trial. *Nutritional Neuroscience*. 2021;24:102-8.
43. Farhangi MA, Javid AZ, Sarmadi B, Karimi P, Dehghan P. A randomized controlled trial on the efficacy of resistant dextrin, as functional food, in women with type 2 diabetes: Targeting the hypothalamic-pituitary-adrenal axis and immune system. *Clinical Nutrition*. 2018;37:1216-23.
44. Feher J, Pinter E, Kovács I, et al. Irritable eye syndrome: neuroimmune mechanisms and benefits of selected nutrients. *Ocul Surf*. 2014;12:134-45.
45. Gerasimov S, Gantzel J, Dementieva N, et al. Role of lactobacillus rhamnosus (Floraactive™) 19070-2 and lactobacillus reuteri (floraactive™) 12246 in infant colic: A randomized dietary study. *Nutrients*. 2018;10 (12) (no pagination).

46. Gertenrich RL, Hart RW. Treatment of oral ulcerations with Bacid (Lactobacillus acidophilus). *Oral Surg Oral Med Oral Pathol.* 1970;30:196-200.
47. Ghaderi A, Banafshe HR, Mirhosseini N, et al. Clinical and metabolic response to vitamin D plus probiotic in schizophrenia patients. *BMC Psychiatry Vol 19 2019, ArtID 77.* 2019;19.
48. Gomi A, Yamaji K, Watanabe O, et al. Bifidobacterium bifidum YIT 10347 fermented milk exerts beneficial effects on gastrointestinal discomfort and symptoms in healthy adults: A double-blind, randomized, placebo-controlled study. *Journal of Dairy Science.* 2018;101:4830-41.
49. Grimaldi R, Gibson GR, Vulevic J, et al. A prebiotic intervention study in children with autism spectrum disorders (ASDs). *Microbiome.* 2018;6:133.
50. Gualtieri P, Marchetti M, Cioccoloni G, et al. Psychobiotics Regulate the Anxiety Symptoms in Carriers of Allele A of IL-1beta Gene: A Randomized, Placebo-Controlled Clinical Trial. *Mediators Inflamm.* 2020;2020:2346126.
51. Guglielmetti S, Mora D, Gschwender M, Popp K. Randomised clinical trial: Bifidobacterium bifidum MIMBb75 significantly alleviates irritable bowel syndrome and improves quality of life--a double-blind, placebo-controlled study. *Aliment Pharmacol Ther.* 2011;33:1123-32.
52. Gupta AK, Maity C. Efficacy and safety of Bacillus coagulans LBSC in irritable bowel syndrome: A prospective, interventional, randomized, double-blind, placebo-controlled clinical study [CONSORT Compliant]. *Medicine.* 2021;100:e23641.
53. Guyonnet D, Chassany O, Ducrotte P, et al. Effect of a fermented milk containing Bifidobacterium animalis DN-173 010 on the health-related quality of life and symptoms in irritable bowel syndrome in adults in primary care: a multicentre, randomized, double-blind, controlled trial. *Aliment Pharmacol Ther.* 2007;26:475-86.
54. Han K, Wang J, Seo JG, Kim H. Efficacy of double-coated probiotics for irritable bowel syndrome: a randomized double-blind controlled trial. *Journal of Gastroenterology.* 2017;52:432-43.
55. Hilimire MR, DeVlyder JE, Forestell CA. Fermented foods, neuroticism, and social anxiety: An interaction model. *Psychiatry Research.* 2015;228:203-8.
56. Huang W, Gan W, Huang A, et al. Efficacy of electroacupuncture combined with probiotics for depression and chronic diarrhea in patients and effect on serum inflammatory cytokines, NE and BDNF. *Experimental Ther.* 2019;18:3470-4.
57. Hwang YH, Park S, Paik JW, et al. Efficacy and Safety of Lactobacillus Plantarum C29-Fermented Soybean (DW2009) in Individuals with Mild Cognitive Impairment: A 12-Week, Multi-Center, Randomized, Double-Blind, Placebo-Controlled Clinical Trial. *Nutrients.* 2019;11:01.
58. Itzhaki RF, Lathe R, Balin BJ, et al. Microbes and Alzheimer's Disease. *Journal of Alzheimer's Disease.* 2016;51:979-84.
59. Jaatinen N, Korpela R, Poussa T, et al. Effects of daily intake of yoghurt enriched with bioactive components on chronic stress responses: a double-blinded randomized controlled trial. *Int J Food Sci Nutr.* 2014;65:507-14.
60. Jacka FN. Targeting the gut to achieve improved outcomes in mood disorders. *Bipolar Disorders.* 2019;21:88-9.
61. Jamilian H, Ghaderi A. The Effects of Probiotic and Selenium Co-supplementation on Clinical and Metabolic Scales in Chronic Schizophrenia: a Randomized, Double-blind, Placebo-Controlled Trial. *Biol Trace Elem Res.* 2021;06:06.
62. Jiang L, Zhu W. Probiotics improved the effectiveness and safety of the quadruple Helicobacter pylori eradication therapy. *Biomedical Research (India).* 2018;29:2053-6.
63. Jiang HY, Xu LL, Zhang X, Zhang Z, Ruan B. The microbiome in bipolar depression: A longitudinal study of one pair of monozygotic twins. *Bipolar Disorders.* 2019;21:93-7.

64. Jicha GA, Abner EL, Kryscio RJ, et al. A phase I, randomized, double-blind, placebo-controlled, multiple ascending dose study of AT-001 yeast selenium for the prevention of Alzheimer's disease. *Alzheimer's & dementia*.11:P471.
65. Johnson D, Letchumanan V, Thuraijasingam S, Lee LH. A Revolutionizing Approach to Autism Spectrum Disorder Using the Microbiome. *Nutrients*. 2020;12:03.
66. Julianelle L, Ebaugh F. Implantation of Bacillus Acidophilus in Persons with Psychoses. *Archives of Neurology & Psychiatry*. 1923;9:769-77.
67. Kao D, Roach B, Silva M, et al. Effect of oral capsule- vs colonoscopy-delivered fecal microbiota transplantation on recurrent Clostridium difficile infection: A randomized clinical trial. *JAMA - Journal of the American Medical Association*. 2017;318:1985-93.
68. Karadag N, Dilli D, Dursun A, et al. Treatment of infantile colic with lactobacillus reuteri and the relationship with postpartum depression: a randomized controlled trial study. *Archives of disease in childhood*. 2012;97:A474-A5.
69. Karakula-Juchnowicz H, Rog J, Juchnowicz D, et al. The study evaluating the effect of probiotic supplementation on the mental status, inflammation, and intestinal barrier in major depressive disorder patients using gluten-free or gluten-containing diet (SANGUT study): a 12-week, randomized, double-blind, and placebo-controlled clinical study protocol. *Nutr J*. 2019;18:50.
70. Karbownik MS, Kreczynska J, Kwarta P, et al. Effect of Supplementation with Saccharomyces Boulardii on Academic Examination Performance and Related Stress in Healthy Medical Students: A Randomized, Double-Blind, Placebo-Controlled Trial. *Nutrients*. 2020;12:19.
71. Kazemi A, Noorbala AA, Azam K, Djafarian K. Effect of prebiotic and probiotic supplementation on circulating pro-inflammatory cytokines and urinary cortisol levels in patients with major depressive disorder: A double-blind, placebo-controlled randomized clinical trial. *J. Funct. Foods*. 2019;52:596-602.
72. Kazemi A, Noorbala AA, Djafarian K. Effect of probiotic and prebiotic versus placebo on appetite in patients with major depressive disorder: post hoc analysis of a randomised clinical trial. *J Hum Nutr Diet*. 2020;33:56-65.
73. Kim LS, Waters RF, Burkholder PM. Immunological activity of larch arabinogalactan and Echinacea: A preliminary, randomized, double-blind, placebo-controlled trial. *Alternative Medicine Review*. 2002;7:138-49.
74. Kim HK, Kim SH, Jang CS, et al. The combined effects of yogurt and exercise in healthy adults: Implications for biomarkers of depression and cardiovascular diseases. *Food sci*. 2018;6:1968-74.
75. Kim CS, Shin DM. Probiotic food consumption is associated with lower severity and prevalence of depression: A nationwide cross-sectional study. *Nutrition*. 2019;63-64:169-74.
76. Kitaoka K, Uchida K, Okamoto N, et al. Fermented ginseng improves the first-night effect in humans. *Sleep*. 2009;32:413-21.
77. Kleiman SC, Watson HJ, Bulik-Sullivan EC, et al. The Intestinal Microbiota in Acute Anorexia Nervosa and During Renourishment: Relationship to Depression, Anxiety, and Eating Disorder Psychopathology. *Psychosomatic Medicine*. 2015;77:969-81.
78. Kleiman SC, Glenn EM, Bulik-Sullivan EC, et al. Daily Changes in Composition and Diversity of the Intestinal Microbiota in Patients with Anorexia Nervosa: A Series of Three Cases. *European Eating Disorders Review*. 2017;25:423-7.
79. Kleiman SC, Bulik-Sullivan EC, Glenn EM, et al. The Gut-Brain Axis in Healthy Females: Lack of Significant Association between Microbial Composition and Diversity with Psychiatric Measures. *PLoS ONE*. 2017;12:e0170208.

80. Kobayashi Y, Kinoshita T, Matsumoto A, Yoshino K, Saito I, Xiao JZ. Bifidobacterium Breve A1 Supplementation Improved Cognitive Decline in Older Adults with Mild Cognitive Impairment: an Open- Label, Single-Arm Study. *Journal of prevention of alzheimer's disease*. 2019.
81. Kreijkamp-Kaspers S, Kok L, Grobbee DE, et al. Effect of soy protein containing isoflavones on cognitive function, bone mineral density, and plasma lipids in postmenopausal women: a randomized controlled trial. *JAMA*. 2004;292:65-74.
82. Kretzschmar A. Microbiome and depression. New findings, new therapies? *Psychopharmakotherapie*. 2017;24:130-1.
83. Krug A, Cannavale C, Khan N, Holscher H. The Effect of Prebiotic Consumption on the Gastrointestinal Microbiota of Healthy Adults: A Randomized, Controlled, Crossover Trial (P20-015-19). *Current Developments in Nutrition*. 2019;3.
84. Kurokawa S, Kishimoto T, Mizuno S, et al. The effect of fecal microbiota transplantation on psychiatric symptoms among patients with irritable bowel syndrome, functional diarrhea and functional constipation: An open-label observational study. *Journal of Affective Disorders*. 2018;235:506-12.
85. Langkamp-Henken B, Rowe CC, Ford AL, et al. Bifidobacterium bifidum R0071 results in a greater proportion of healthy days and a lower percentage of academically stressed students reporting a day of cold/flu: a randomised, double-blind, placebo-controlled study. *British Journal of Nutrition*. 2015;113:426-34.
86. Lecerf JM. Psychobiotics: Human studies. [French]. *Phytotherapie*. 2018;16:336-41.
87. Lee KJ, Ji GE. The effect of fermented red ginseng on depression is mediated by lipids. *Nutritional Neuroscience*. 2014;17:7-15.
88. Legette L, Ikonte C, Mitmesser S. Sampling Trial Showed S-equol Supplementation Helped Relieve Menopausal Symptoms (P06-111-19). *Current Developments in Nutrition*. 2019;3.
89. Liu Y, Zhang L, Wang X, et al. Similar Fecal Microbiota Signatures in Patients With Diarrhea-Predominant Irritable Bowel Syndrome and Patients With Depression. *Clin Gastroenterol Hepatol*. 2016;14:1602-11.
90. Lorenzo-Zuniga V, Llop E, Suarez C, et al. I.31, a new combination of probiotics, improves irritable bowel syndrome-related quality of life. *World Journal of Gastroenterology*. 2014;20:8709-16.
91. Ma ZF, Yusof N, Hamid N, et al. Bifidobacterium infantis M-63 improves mental health in victims with irritable bowel syndrome developed after a major flood disaster. *Beneficial Microbes*. 2019;10:111-20.
92. Makino S, Hemmi J, Kano H, Kashiwagi M, Hojo K, Asami Y. Anti-Fatigue Effects of Yogurt Fermented with *Lactobacillus delbureckii* subsp. *bulgaricus* OLL1073R-1 in Healthy People Suffering from Summer Heat Fatigue: A Randomized, Double-Blind, Placebo-Controlled Trial. *Nutrients*. 2018;10:21.
93. Marcos A, Warnberg J, Nova E, et al. The effect of milk fermented by yogurt cultures plus *Lactobacillus casei* DN-114001 on the immune response of subjects under academic examination stress. *European Journal of Nutrition*. 2004;43:381-9.
94. Marotta A, Sarno E, Del Casale A, et al. Effects of probiotics on cognitive reactivity, mood, and sleep quality. *Frontiers in Psychiatry Vol 10 2019, ArtID 164*. 2019;10.
95. Mazzawi T, Lied GA, Sangnes DA, et al. The kinetics of gut microbial community composition in patients with irritable bowel syndrome following fecal microbiota transplantation. *PLoS ONE*. 2018;13:e0194904.

96. Messaoudi M, Violle N, Bisson J, Desor D, Javelot H, Rougeot C. Beneficial psychological effects of a probiotic formulation (*Lactobacillus helveticus* R0052 and *Bifidobacterium longum* R0175) in healthy human volunteers. *Gut Microbes*. 2011;2.
97. Mi GL, Zhao L, Qiao DD, Kang WQ, Tang MQ, Xu JK. Effectiveness of *Lactobacillus reuteri* in infantile colic and colicky induced maternal depression: a prospective single blind randomized trial. *Antonie Van Leeuwenhoek*. 2015;107:1547-53.
98. Miyaoka T, Kanayama M, Wake R, et al. *Clostridium butyricum* MIYAIRI 588 as Adjunctive Therapy for Treatment-Resistant Major Depressive Disorder: A Prospective Open-Label Trial. *Clinical Neuropharmacology*. 2018;41:151-5.
99. Mohammadi AA, Jazayeri S, Khosravi-Darani K, et al. The effects of probiotics on mental health and hypothalamic-pituitary-adrenal axis: A randomized, double-blind, placebo-controlled trial in petrochemical workers. *Nutritional Neuroscience*. 2016;19:387-95.
100. Moller CM, Olsa EJA, Ginty AT, et al. Influence of Acute Multispecies and Multistrain Probiotic Supplementation on Cardiovascular Function and Reactivity to Psychological Stress in Young Adults: A Double-Blind, Randomized, Placebo-Controlled Trial. *Psychosomatic Medicine*. 2017;79:914-9.
101. Morita F, Matsuda N, Inui A, et al. Comparison of the efficacy of gorenisan and probiotics among Japanese adults with acute infectious gastroenteritis: a randomized controlled trial. *Journal of general internal medicine*. 2016;31:S166-S7.
102. Morita F, Yokokawa H, Matsuda N, et al. Comparative efficacy of gorenisan and probiotics in Japanese adults with acute infectious gastroenteritis: Randomized controlled trial. *Traditional and Kampo Medicine*. 2017;4:89-93.
103. Mucci M, Carraro C, Mancino P, et al. Soy isoflavones, lactobacilli, Magnolia bark extract, vitamin D3 and calcium. Controlled clinical study in menopause. *Minerva Ginecologica*. 2006;58:323-34.
104. Nagamine T, Ido Y, Nakamura M, Okamura T. 4-galactosylsucrose as a prebiotics may improve underweight in inpatients with schizophrenia. *Bmjh*. 2018;37:45-7.
105. Nagamine T, Ido Y, Okamura T, Nakamura M. The effect of 4G-s-D-galactosylsucrose on antipsychotic related constipation. *International Medical Journal*. 2018;25:138-40.
106. Nakakita Y, Tsuchimoto N, Takata Y, Nakamura T. Effect of dietary heat-killed *Lactobacillus brevis* SBC8803 (SBL88TM) on sleep: a non-randomised, double blind, placebo-controlled, and crossover pilot study. *Beneficial Microbes*. 2016;7:501-9.
107. Nishida K, Sawada D, Kuwano Y, et al. Daily administration of paraprobiotic *Lactobacillus gasseri* CP2305 ameliorates chronic stress-associated symptoms in Japanese medical students. *J. Funct. Foods*. 2017;36:112-21.
108. Nishihira J, Kagami-Katsuyama H, Tanaka A, Nishimura M, Kobayashi T, Kawasaki Y. Elevation of natural killer cell activity and alleviation of mental stress by the consumption of yogurt containing *Lactobacillus gasseri* SBT2055 and *Bifidobacterium longum* SBT2928 in a double-blind, placebo-controlled clinical trial. *J. Funct. Foods*. 2014;11:261-8.
109. Noorwali EA, Beaumont JD, Corfe BM, Owen L. The effects of probiotic supplementation on emotional memory and pain response. *Proceedings of the nutrition society*. 2017;76:E6-.
110. Nova E, Toro O, Varela P, Lopez-Vidriero I, Morande G, Marcos A. Effects of a nutritional intervention with yogurt on lymphocyte subsets and cytokine production capacity in anorexia nervosa patients. *European Journal of Nutrition*. 2006;45:225-33.
111. Okubo R, Koga M, Katsumata N, et al. Effect of *bifidobacterium breve* A-1 on anxiety and depressive symptoms in schizophrenia: A proof-of-concept study. *Journal of Affective Disorders*. 2019;245:377-85.

112. Ostlund-Lagerstrom L, Kihlgren A, Repsilber D, Bjorksten B, Brummer RJ, Schoultz I. Probiotic administration among free-living older adults: a double blinded, randomized, placebo-controlled clinical trial. *Nutrition Journal*. 2016;15:80.
113. Park HJ, Shim HS, Lee GR, et al. A randomized, double-blind, placebo-controlled study on the memory-enhancing effect of lactobacillus fermented Saccharina japonica extract. *European Journal of Integrative Medicine*. 2019;28:39-46.
114. Park M, Choi J, Lee HJ. Flavonoid-Rich Orange Juice Intake and Altered Gut Microbiome in Young Adults with Depressive Symptom: A Randomized Controlled Study. *Nutrients*. 2020;12:18.
115. Paulsen JA, Ptacek TS, Carter SJ, et al. Gut microbiota composition associated with alterations in cardiorespiratory fitness and psychosocial outcomes among breast cancer survivors. *Supportive Care in Cancer*. 2017;25:1563-70.
116. Perez-Cornago A, Sanchez-Villegas A, Bes-Rastrollo M, et al. Intake of High-Fat Yogurt, but Not of Low-Fat Yogurt or Prebiotics, Is Related to Lower Risk of Depression in Women of the SUN Cohort Study. *Journal of Nutrition*. 2016;146:1731-9.
117. Peter J, Fournier C, Durdevic M, et al. A Microbial Signature of Psychological Distress in Irritable Bowel Syndrome. *Psychosomatic Medicine*. 2018;80:698-709.
118. Prantera C, Scribano ML, Falasco G, Andreoli A, Luzi C. Ineffectiveness of probiotics in preventing recurrence after curative resection for Crohn's disease: A randomised controlled trial with Lactobacillus GG. *Gut*. 2002;51:405-9.
119. Quigley EMM. Probiotics for irritable bowel syndrome. *Expert Review of Gastroenterology and Hepatology*. 2009;3:487-92.
120. Rao SSC, Rehman A, Yu S, Andino NM. Brain foginess, gas and bloating: a link between SIBO, probiotics and metabolic acidosis. *Clinical and Translational Gastroenterology*. 2018;9:162.
121. Reale M, Boscolo P, Bellante V, et al. Daily intake of Lactobacillus casei Shirota increases natural killer cell activity in smokers. *British Journal of Nutrition*. 2012;108:308-14.
122. Reininghaus EZ, Wetzlmair LC, Fellendorf FT, et al. The Impact of Probiotic Supplements on Cognitive Parameters in Euthymic Individuals with Bipolar Disorder: A Pilot Study. *Neuropsychobiology*. 2018:1-8.
123. Reininghaus EZ, Platzer M, Kohlhammer-Dohr A, et al. PROVIT: Supplementary Probiotic Treatment and Vitamin B7 in Depression-A Randomized Controlled Trial. *Nutrients*. 2020;12:08.
124. Ren M, Zhang H, Qi J, et al. An Almond-Based Low Carbohydrate Diet Improves Depression and Glycometabolism in Patients with Type 2 Diabetes through Modulating Gut Microbiota and GLP-1: A Randomized Controlled Trial. *Nutrients*. 2020;12:03.
125. Roman P, Estevez AF, Sanchez-Labraca N, Canadas F, Miras A, Cardona D. Probiotics for fibromyalgia: study design for a pilot double-blind, randomized controlled trial. *Nutricion Hospitalaria*. 2017;34:1246-51.
126. Rong H, Xie X-h, Zhao J, et al. Similarly in depression, nuances of gut microbiota: Evidences from a shotgun metagenomics sequencing study on major depressive disorder versus bipolar disorder with current major depressive episode patients. *Journal of Psychiatric Research*. 2019;113:90-9.
127. Sanborn V, Azcarate-Peril MA, Updegraff J, Manderino LM, Gunstad J. A randomized clinical trial examining the impact of LGG probiotic supplementation on psychological status in middle-aged and older adults. *Contemporary Clinical Trials Communications*. 2018;12:192-7.
128. Sanborn V, Azcarate-Peril MA, Updegraff J, Manderino L, Gunstad J. Randomized Clinical Trial Examining the Impact of Lactobacillus rhamnosus GG Probiotic Supplementation on Cognitive Functioning in Middle-aged and Older Adults. *Neuropsychiatr*. 2020;16:2765-77.



129. Sashihara T, Nagata M, Mori T, et al. Effects of Lactobacillus gasseri OLL2809 and alpha-lactalbumin on university-student athletes: a randomized, double-blind, placebo-controlled clinical trial. *Appl Physiol Nutr Metab*. 2013;38:1228-35.
130. Schmidt K, Cowen PJ, Harmer CJ, Tzortzis G, Errington S, Burnet PW. Prebiotic intake reduces the waking cortisol response and alters emotional bias in healthy volunteers. *Psychopharmacology*. 2015;232:1793-801.
131. Severance EG, Gressitt KL, Stallings CR, et al. Candida albicans exposures, sex specificity and cognitive deficits in schizophrenia and bipolar disorder. *NPJ Schizophrenia*. 2016;2:16018.
132. Severance EG, Gressitt KL, Stallings CR, et al. Probiotic normalization of Candida albicans in schizophrenia: A randomized, placebo-controlled, longitudinal pilot study. *Brain, Behavior, and Immunity*. 2017;62:41-5.
133. Shafahi A, Pourkazemi A, Khosravani M, et al. The Effect of Probiotic Plus Prebiotic Supplementation on the Tolerance and Efficacy of Helicobacter Pylori Eradication Quadruple Therapy: a Randomized Prospective Double Blind Controlled Trial. *Middle East Journal of Digestive Diseases*. 2016;8:179-88.
134. Shinkai S, Toba M, Saito T, et al. Immunoprotective effects of oral intake of heat-killed Lactobacillus pentosus strain b240 in elderly adults: a randomised, double-blind, placebo-controlled trial. *Br J Nutr*. 2013;109:1856-65.
135. Siddiqui RA, Harvey KA. Dietary interventions with n-3 fatty acids or probiotics targeting post-myocardial infarction depression. *British Journal of Nutrition*. 2013;109:1-3.
136. Singh S, Jing E, Stollman N. Self-Limited Sepsis Syndrome Following Fecal Microbiota Therapy for Refractory C. difficile Infection. *Digestive Diseases and Sciences*. 2016;61:2488-91.
137. Smith AP, Sutherland D, Hewlett P. An Investigation of the Acute Effects of Oligofructose-Enriched Inulin on Subjective Wellbeing, Mood and Cognitive Performance. *Nutrients*. 2015;7:8887-96.
138. Soldi S, Tagliacarne SC, Valsecchi C, et al. Effect of a multistrain probiotic (Lactoflorene<sup>+</sup> Plus) on inflammatory parameters and microbiota composition in subjects with stress-related symptoms. *Neurobiology of Stress*. 2019;10 (no pagination).
139. Stevenson C, Blaauw R, Fredericks E, Visser J, Roux S. Randomized clinical trial: effect of Lactobacillus plantarum 299 v on symptoms of irritable bowel syndrome. *Nutrition*. 2014;30:1151-7.
140. Stokes CS, Schneider JG, Wilmes P, Lammert F. Randomised placebo-controlled trial assessing whether probiotic supplements ameliorate depressive symptoms in patients with chronic hepatitis C virus infection. *Journal of hepatology*. 2015;62.
141. Takada M, Nishida K, Kataoka-Kato A, et al. Probiotic Lactobacillus casei strain Shirota relieves stress-associated symptoms by modulating the gut-brain interaction in human and animal models. *Neurogastroenterol Motil*. 2016;28:1027-36.
142. Takada M, Nishida K, Gondo Y, et al. Beneficial effects of Lactobacillus casei strain Shirota on academic stress-induced sleep disturbance in healthy adults: a double-blind, randomised, placebo-controlled trial. *Beneficial Microbes*. 2017;8:153-62.
143. Talbott S, Stephens B, Talbott J, Oddou M. Effect of coordinated probiotic/prebiotic/phytobiotic supplementation on microbiome balance and psychological mood state in healthy stressed adults. *FASEB journal*. 2018;32.
144. Tamtaji OR, Heidari-Soureshjani R, Mirhosseini N, et al. Probiotic and selenium co-supplementation, and the effects on clinical, metabolic and genetic status in Alzheimer's disease: A randomized, double-blind, controlled trial. *Clinical Nutrition*. 2018;10:10.

145. Tazzyman S, Richards N, Trueman AR, et al. Vitamin D associates with improved quality of life in participants with irritable bowel syndrome: outcomes from a pilot trial. *BMJ open gastroenterology*. 2015;2.
146. Tomasik J, Yolken RH, Bahn S, Dickerson FB. Immunomodulatory Effects of Probiotic Supplementation in Schizophrenia Patients: A Randomized, Placebo-Controlled Trial. *Biomark Insights*. 2015;10:47-54.
147. Tran N, Zhebrak M, Yacoub C, Pelletier J, Hawley D. The gut-brain relationship: Investigating the effect of multispecies probiotics on anxiety in a randomized placebo-controlled trial of healthy young adults. *Journal of Affective Disorders*. 2019;252:271-7.
148. Uemura M, Hayashi F, Ishioka K, et al. Obesity and mental health improvement following nutritional education focusing on gut microbiota composition in Japanese women: a randomised controlled trial. *European Journal of Nutrition*. 2019;06:06.
149. Urita Y, Goto M, Watanabe T, et al. Continuous consumption of fermented milk containing *Bifidobacterium bifidum* YIT 10347 improves gastrointestinal and psychological symptoms in patients with functional gastrointestinal disorders. *Bmfh*. 2015;34:37-44.
150. Vaghef-Mehrabany E, Alipour B, Homayouni-Rad A, Sharif SK, Asghari-Jafarabadi M, Zavvari S. Probiotic supplementation improves inflammatory status in patients with rheumatoid arthritis. *Nutrition*. 2014;30:430-5.
151. Vaghef-Mehrabany E, Homayouni-Rad A, Alipour B, Sharif SK, Vaghef-Mehrabany L, Alipour-Ajiry S. Effects of Probiotic Supplementation on Oxidative Stress Indices in Women with Rheumatoid Arthritis: A Randomized Double-Blind Clinical Trial. *Journal of the American College of Nutrition*. 2016;35:291-9.
152. Valles-Colomer M, Falony G, Darzi Y, et al. The neuroactive potential of the human gut microbiota in quality of life and depression. *Nature Microbiology*. 2019;4:623-32.
153. Venkataraman R, Madempudi RS, Neelamraju J, et al. Effect of Multi-strain Probiotic Formulation on Students Facing Examination Stress: a Double-Blind, Placebo-Controlled Study. *Probiot*. 2021;13:12-8.
154. Vulevic J, Tzortzis G, Juric A, Gibson GR. Effect of a prebiotic galactooligosaccharide mixture (B-GOS) on gastrointestinal symptoms in adults selected from a general population who suffer with bloating, abdominal pain, or flatulence. *Neurogastroenterol Motil*. 2018;30:e13440.
155. Wallace C, Foster J, Milev R. The efficacy, safety, and tolerability of probiotics on symptoms of depression: results from a pilot study. *Annals of nutrition & metabolism*. 2018;72:55-.
156. Wallace CJK, Milev RV. The Efficacy, Safety, and Tolerability of Probiotics on Depression: Clinical Results From an Open-Label Pilot Study. *Front Psychiatr*. 2021;12:618279.
157. Wang H, Braun C, Enck P. Effects of Rifaximin on Central Responses to Social Stress-a Pilot Experiment. *Neurotherapeutics*. 2018;15:807-18.
158. Wang H, Braun C, Murphy EF, Enck P. *Bifidobacterium longum* 1714TM Strain Modulates Brain Activity of Healthy Volunteers During Social Stress. *The American journal of gastroenterology*. 2019;17.
159. Westfall E, Brandenburg D. Probiotics for Symptoms of Depression and Anxiety. *American Family Physician*. 2018;97:Online.
160. Wilson PB. Perceived life stress and anxiety correlate with chronic gastrointestinal symptoms in runners. *Journal of Sports Sciences*. 2018;36:1713-9.
161. Xia X, Chen J, Xia J, et al. Role of probiotics in the treatment of minimal hepatic encephalopathy in patients with HBV-induced liver cirrhosis. *Journal of International Medical Research*. 2018;46:3596-604.

162. Xiao J, Katsumata N, Bernier F, et al. Probiotic Bifidobacterium breve in Improving Cognitive Functions of Older Adults with Suspected Mild Cognitive Impairment: A Randomized, Double-Blind, Placebo-Controlled Trial. *Journal of Alzheimer's Disease*. 2020;77:139-47.
163. Yang H, Tang S, Huang H, et al. Probiotics reduce psychological stress in patients before laryngeal cancer surgery. *Asia-Pacific Journal of Clinical Oncology*. 2016;12:e92-e6.
164. Yi SH, Jernigan JA, McDonald LC. Prevalence of probiotic use among inpatients: A descriptive study of 145 U.S. hospitals. *American Journal of Infection Control*. 2016;44:548-53.
165. Yuan TF, Ferreira Rocha NB, Paes F, Arias-Carrion O, Machado S, de Sa Filho AS. Neural Mechanisms of Exercise: Effects on Gut Microbiota and Depression. *CNS & Neurological Disorders Drug Targets*. 2015;14:1312-4.
166. Yuan X, Zhang P, Wang Y, et al. Changes in metabolism and microbiota after 24-week risperidone treatment in drug naive, normal weight patients with first episode schizophrenia. *Schizophrenia Research*. 2018;201:299-306.
167. Zamudio-Tiburcio A, Bermudez-Ruiz H, Lezama-Guzman HR, Guevara-Ortigoza MDP, Islas-Solares E, Sosa-Lopez FA. Breaking paradigms. Intestinal microbiota transplantation: Preliminary report. *Cirugia y Cirujanos (English Edition)*. 2017;85:6-12.
168. Zhang L, Liu YX, Wang Z, et al. Clinical characteristic and fecal microbiota responses to probiotic or antidepressant in patients with diarrhea-predominant irritable bowel syndrome with depression comorbidity: a pilot study. *Chinese Medical Journal*. 2019;132:346-51.

## Section 5: Included study characteristics

Characteristics of studies included in meta-analysis:

| Author, Year, Country                             | Research Methods                                                                                                                                                                                                                                                                                                                                                                                                                                                                                                                                                                                     | Participant Characteristics                                                                                                                                               | Intervention                                                                                                                                                                                                                                                                                                                                             | Relevant Outcomes                                                           | Findings                                                                                                                                                                                                                   |
|---------------------------------------------------|------------------------------------------------------------------------------------------------------------------------------------------------------------------------------------------------------------------------------------------------------------------------------------------------------------------------------------------------------------------------------------------------------------------------------------------------------------------------------------------------------------------------------------------------------------------------------------------------------|---------------------------------------------------------------------------------------------------------------------------------------------------------------------------|----------------------------------------------------------------------------------------------------------------------------------------------------------------------------------------------------------------------------------------------------------------------------------------------------------------------------------------------------------|-----------------------------------------------------------------------------|----------------------------------------------------------------------------------------------------------------------------------------------------------------------------------------------------------------------------|
| Akkasheh et al. <sup>1</sup><br>2016<br>Iran      | <p><b>Study design:</b> RCT</p> <p><b>Dates of recruitment:</b><br/>July 2014 - Sept 2014</p> <p><b>Inclusion Criteria:</b> Patients with a diagnosis of MDD based on DSM-IV criteria and with a score of 15 on the 17-item Hamilton Depression Rating Scale referred from Kargarneghad Hospital, Kashan University of Medical Sciences</p> <p><b>Exclusion Criteria:</b> Age &lt;20 years or &gt;55 years; a history of coronary infarction, angina pectoris, pregnancy or lactation, or substance abuse; and taking dietary supplements or probiotic supplements during the previous 2 months.</p> | <p><b>Intervention:</b><br/>n=20 (females: 17)</p> <p>Mean age (SD): 38.3 (12.1)</p> <hr/> <p><b>Control:</b><br/>n=20 (females: 17)</p> <p>Mean age ± SD: 36.2 ± 8.2</p> | <p><b>Type:</b> <i>Lactobacillus acidophilus</i>, <i>L. casei</i>, and <i>Bifidobacterium bifidum</i></p> <p><b>Probiotic Dosage:</b> 2x10<sup>9</sup> CFU/g for each; 1 capsule/day</p> <p><b>Additional supplement:</b> None</p> <p><b>Probiotic Duration:</b> 8 weeks</p> <p><b>Comparator:</b> Placebo</p> <p><b>Additional supplement:</b> None</p> | <ul style="list-style-type: none"> <li>• BDI</li> </ul>                     | <ul style="list-style-type: none"> <li>• After 8 week of intervention, patients who received probiotic supplements had significantly decreased Beck Depression Inventory total scores compared with the placebo</li> </ul> |
| Browne et al. <sup>2</sup><br>2021<br>Netherlands | <p><b>Study design:</b> RCT</p> <p><b>Dates of recruitment:</b><br/>March 2017 - Sept 2018</p>                                                                                                                                                                                                                                                                                                                                                                                                                                                                                                       | <p><b>Intervention</b><br/>n=20 (females: 20)</p> <p>Mean age (SD): 29.65 (3.9)</p> <hr/> <p><b>Control</b></p>                                                           | <p><b>Type:</b> <i>Bifidobacterium bifidum</i> W23, <i>B. lactis</i> W51, <i>B. lactis</i> W52, <i>Lactobacillus acidophilus</i> W37, <i>L. brevis</i> W63, <i>L. casei</i> W56, <i>L. salivarius</i> W24, <i>Lactococcus</i></p>                                                                                                                        | <ul style="list-style-type: none"> <li>• EPDS</li> <li>• LEIDS-R</li> </ul> | <ul style="list-style-type: none"> <li>• Depressive symptoms reduced in both the placebo and intervention groups after 8 weeks, however, differences were non-significant.</li> </ul>                                      |

|  |                                                                                                                                                                                                                                                                                                                                                                                                                                                                                                                                                                                                                                                                                                                                                                                                                                                                                                                                                                                                                                                                                                                                                 |                                                          |                                                                                                                                                                                                                                                                                                       |  |  |
|--|-------------------------------------------------------------------------------------------------------------------------------------------------------------------------------------------------------------------------------------------------------------------------------------------------------------------------------------------------------------------------------------------------------------------------------------------------------------------------------------------------------------------------------------------------------------------------------------------------------------------------------------------------------------------------------------------------------------------------------------------------------------------------------------------------------------------------------------------------------------------------------------------------------------------------------------------------------------------------------------------------------------------------------------------------------------------------------------------------------------------------------------------------|----------------------------------------------------------|-------------------------------------------------------------------------------------------------------------------------------------------------------------------------------------------------------------------------------------------------------------------------------------------------------|--|--|
|  | <p><b>Inclusion Criteria:</b> Elevated levels of depressive symptoms (EPDS <math>\geq</math> 10) and/or anxiety (STAI-S <math>\geq</math> 40); start daily probiotic/placebo product intake between 26 and 30 weeks gestational age and continue until delivery</p> <p><b>Exclusion Criteria:</b> (1) multiple pregnancy, (2) high suicidal risk according to the suicidality subscale score on the MINI International Neuropsychiatric Interview, (3) illegal drug use, (4) psychiatric history of psychoses or bipolar disorder, (5) inflammatory bowel disease, (6) other autoimmune disorders and/or treatment with immunosuppressive therapy, (7) known pre-existing diabetes mellitus, hyperemesis gravidarum, hypertensive disorder, liver and/or renal disease, (8) malignancy and/or treatment with radiation or chemotherapy, (9) history of major gastro-intestinal surgery, (10) allergy or hypersensitivity to any ingredients in the Ecologic Barrier/placebo product, (11) history of using Ecologic Barrier, (12) presently using food containing probiotics (probiotic intake needed to stop at least 2 weeks prior to the</p> | <p>n=20 (females: 20)</p> <p>Mean age (SD): 31.7 (4)</p> | <p><i>lactis</i> W19 and <i>Lactococcus lactis</i> W58</p> <p><b>Probiotic Dosage:</b> <math>2.5 \times 10^9</math> CFU/g; 2g/day</p> <p><b>Additional supplement:</b> None</p> <p><b>Probiotic Duration:</b> 8 weeks</p> <p><b>Comparator:</b> Placebo</p> <p><b>Additional supplement:</b> None</p> |  |  |
|--|-------------------------------------------------------------------------------------------------------------------------------------------------------------------------------------------------------------------------------------------------------------------------------------------------------------------------------------------------------------------------------------------------------------------------------------------------------------------------------------------------------------------------------------------------------------------------------------------------------------------------------------------------------------------------------------------------------------------------------------------------------------------------------------------------------------------------------------------------------------------------------------------------------------------------------------------------------------------------------------------------------------------------------------------------------------------------------------------------------------------------------------------------|----------------------------------------------------------|-------------------------------------------------------------------------------------------------------------------------------------------------------------------------------------------------------------------------------------------------------------------------------------------------------|--|--|

|                                                  |                                                                                                                                                                                                                                                                                                                                                                                                                                                                                                                                                                                                                                                                                                                                                                                                                                                                                                                                        |                                                                                                                                                                                |                                                                                                                                                                                                                                                                                                                                                                                                                                                                                                                     |                                                                                                  |                                                                                                                                                       |
|--------------------------------------------------|----------------------------------------------------------------------------------------------------------------------------------------------------------------------------------------------------------------------------------------------------------------------------------------------------------------------------------------------------------------------------------------------------------------------------------------------------------------------------------------------------------------------------------------------------------------------------------------------------------------------------------------------------------------------------------------------------------------------------------------------------------------------------------------------------------------------------------------------------------------------------------------------------------------------------------------|--------------------------------------------------------------------------------------------------------------------------------------------------------------------------------|---------------------------------------------------------------------------------------------------------------------------------------------------------------------------------------------------------------------------------------------------------------------------------------------------------------------------------------------------------------------------------------------------------------------------------------------------------------------------------------------------------------------|--------------------------------------------------------------------------------------------------|-------------------------------------------------------------------------------------------------------------------------------------------------------|
|                                                  | start of the probiotic/placebo product intake), (13) not speaking and/or writing Dutch.                                                                                                                                                                                                                                                                                                                                                                                                                                                                                                                                                                                                                                                                                                                                                                                                                                                |                                                                                                                                                                                |                                                                                                                                                                                                                                                                                                                                                                                                                                                                                                                     |                                                                                                  |                                                                                                                                                       |
| Chahwan et al. <sup>3</sup><br>Australia<br>2019 | <p><b>Study Design:</b> RCT</p> <p><b>Dates of Recruitment:</b> NR</p> <p><b>Inclusion Criteria:</b> BDI score <math>\geq</math> 12; age <math>\geq</math> 18 years; could provide informed consent; were willing and able to travel to UTS Ultimo campus on a weekly basis to complete questionnaires on mental wellbeing; could provide a stool sample at the start and end of the treatment period; and not consume probiotic-rich foods and drinks such as fermented cheeses during the trial.</p> <p><b>Exclusion Criteria:</b> Diagnosed with HIV/AIDS, cancer, or undergoing chemotherapy; Crohn's disease, ulcerative colitis, lactose-intolerance, or gluten-intolerance; currently experiencing severe depressive symptoms (BDI <math>&gt;</math>57 or a score of 2 or 3 on Q9 of the BDI investigating suicidal ideation); actively suicidal or actively self-harming; diagnosed with bipolar disorder or a personality</p> | <p><b>Intervention:</b><br/>n=34 (females: 21)</p> <p>Mean age (SD): 36.65 (11.75)</p> <hr/> <p><b>Control:</b><br/>n=37 (females: 28)</p> <p>Mean age (SD): 35.49 (12.34)</p> | <p><b>Type:</b> <i>Bifidobacterium bifidum</i> W23, <i>B. lactis</i> W51, <i>B. lactis</i> W52, <i>Lactobacillus acidophilus</i> W37, <i>L. brevis</i> W63, <i>L. casei</i> W56, <i>L. salivarius</i> W24, <i>Lactococcus lactis</i> W19, and <i>Lactococcus lactis</i> W58</p> <p><b>Probiotic Dosage:</b><br/>1 x 10<sup>10</sup> CFU/day</p> <p><b>Additional Supplement:</b> None</p> <p><b>Probiotic Duration:</b><br/>8 weeks</p> <p><b>Comparator:</b> Placebo</p> <p><b>Additional Supplement:</b> None</p> | <ul style="list-style-type: none"> <li>• BDI-2</li> <li>• DASS21-D</li> <li>• LEIDS-R</li> </ul> | <ul style="list-style-type: none"> <li>• There was no statistically significant main effect of intervention on BDI-2, LEIDS-R, or DASS21-D</li> </ul> |

|                                               |                                                                                                                                                                                                                                                                                                                                                                                                                                                                                                                                                  |                                                                                                                                                                                                                   |                                                                                                                                                                                                                                                                                          |                                                              |                                                                                                                      |
|-----------------------------------------------|--------------------------------------------------------------------------------------------------------------------------------------------------------------------------------------------------------------------------------------------------------------------------------------------------------------------------------------------------------------------------------------------------------------------------------------------------------------------------------------------------------------------------------------------------|-------------------------------------------------------------------------------------------------------------------------------------------------------------------------------------------------------------------|------------------------------------------------------------------------------------------------------------------------------------------------------------------------------------------------------------------------------------------------------------------------------------------|--------------------------------------------------------------|----------------------------------------------------------------------------------------------------------------------|
|                                               | disorder, a psychotic disorder or otherwise experiencing psychosis; engaging in high-risk alcohol consumption (20 standard drinks per week for males, 12 standard drinks per week for females); currently receiving psychological or pharmacological treatment for mental health issues (including antidepressants); currently or having taken antibiotics or probiotic supplements within two weeks of trial; pregnant or planning to become pregnant within the time course of the trial; or currently participating in another research trial |                                                                                                                                                                                                                   |                                                                                                                                                                                                                                                                                          |                                                              |                                                                                                                      |
| Chong et al. <sup>4</sup><br>2019<br>Malaysia | <p><b>Study design:</b> RCT</p> <p><b>Dates of Recruitment:</b> NR</p> <p><b>Inclusion Criteria:</b> Men or women, aged 18-60 years old, willing to commit throughout the experiment, and a score of moderate stress level on Cohen's Perceived Stress Scale (PSS-10)</p> <p><b>Exclusion Criteria:</b> Type 1 diabetes, long term medication due to certain severe illness, HIV/AIDS, and glucose-6-</p>                                                                                                                                        | <p><b>Intervention:</b><br/>n=56 (females: NR)</p> <p>Age: 31.1 ± 7.8 (type of value not specified)</p> <hr/> <p><b>Control:</b><br/>n=55 (females: NR)</p> <p>Age: 32.1 ± 11.0 (type of value not specified)</p> | <p><b>Type:</b> <i>Lactobacillus plantarum</i> DR7</p> <p><b>Probiotic Dosage:</b><br/>1 x 10<sup>9</sup> CFU / day</p> <p><b>Additional supplement:</b> None</p> <p><b>Probiotic Duration:</b> 12 weeks</p> <p><b>Comparator:</b> Placebo</p> <p><b>Additional supplement:</b> None</p> | <ul style="list-style-type: none"> <li>• DASS42-D</li> </ul> | <ul style="list-style-type: none"> <li>• No statistically significant effect due to treatment identified.</li> </ul> |

|                                                  |                                                                                                                                                                                                                                                                                                                                                                                                                                                                                                                                                                                                                                                                                                                                                                                                                           |                                                                                                                                                                                                                                                                                                                                                                                |                                                                                                                                                                                                                                                                                                                         |                                                            |                                                                                                                      |
|--------------------------------------------------|---------------------------------------------------------------------------------------------------------------------------------------------------------------------------------------------------------------------------------------------------------------------------------------------------------------------------------------------------------------------------------------------------------------------------------------------------------------------------------------------------------------------------------------------------------------------------------------------------------------------------------------------------------------------------------------------------------------------------------------------------------------------------------------------------------------------------|--------------------------------------------------------------------------------------------------------------------------------------------------------------------------------------------------------------------------------------------------------------------------------------------------------------------------------------------------------------------------------|-------------------------------------------------------------------------------------------------------------------------------------------------------------------------------------------------------------------------------------------------------------------------------------------------------------------------|------------------------------------------------------------|----------------------------------------------------------------------------------------------------------------------|
|                                                  | phosphate dehydrogenase deficient, and subjects who, in opinion of the investigator, were not likely to complete the trial for whatever reasons                                                                                                                                                                                                                                                                                                                                                                                                                                                                                                                                                                                                                                                                           |                                                                                                                                                                                                                                                                                                                                                                                |                                                                                                                                                                                                                                                                                                                         |                                                            |                                                                                                                      |
| Chung et al. <sup>5</sup><br>2014<br>South Korea | <p><b>Study design:</b> RCT</p> <p><b>Dates of Recruitment:</b> NR</p> <p><b>Inclusion Criteria:</b> Aged 60-75 years, experienced using computers and an education above middle school; scored <math>\geq 24</math> on the mini-mental status examination-Korean; were within <math>\pm 30\%</math> of ideal body weight (BMI <math>\geq 16</math> and <math>\leq 35</math>); and understood the objectives of the study and agreed to abide by the required rules during the study</p> <p><b>Exclusion Criteria:</b> Diagnosed with a current axis I mental disorder or who had been treated for any axis I mental disorder within the past 5 years; scored <math>\geq 8</math> on the geriatric depression scale-short form; alcohol abuse or dependence within the past 3 months; gastrointestinal disease or had</p> | <p><b>Intervention (500mg):</b><br/>n=10 (females: 6)<br/><br/>Mean Age (SD): 64.50 (2.17)</p> <p><b>Intervention (1000mg):</b><br/>n=7 (females: 5)<br/><br/>Mean Age (SD): 64.43 (4.47)</p> <p><b>Intervention (2000mg):</b><br/>n=9 (females: 4)<br/><br/>Mean Age (SD): 66.56 (4.98)</p> <p><b>Control:</b><br/>n=10 (females: 6)<br/><br/>Mean Age (SD): 64.50 (4.84)</p> | <p><b>Type:</b> <i>Lactobacillus helveticus</i> IDCC3801 fermented skim milk powder</p> <p><b>Probiotic Dosage:</b> 500mg, 1000mg, or 2000mg daily</p> <p><b>Additional supplement:</b> None</p> <p><b>Probiotic Duration:</b> 12 weeks</p> <p><b>Comparator:</b> Placebo</p> <p><b>Additional supplement:</b> None</p> | <ul style="list-style-type: none"> <li>• GDS-SF</li> </ul> | <ul style="list-style-type: none"> <li>• No statistically significant effect due to treatment identified.</li> </ul> |



|                                                 |                                                                                                                                                                                                                                                                                                                                                                                                                                                                                                                                 |                                                                                                                                                                                 |                                                                                                                                                                                                                                                                                                                                                                      |                                                          |                                                                                                                      |
|-------------------------------------------------|---------------------------------------------------------------------------------------------------------------------------------------------------------------------------------------------------------------------------------------------------------------------------------------------------------------------------------------------------------------------------------------------------------------------------------------------------------------------------------------------------------------------------------|---------------------------------------------------------------------------------------------------------------------------------------------------------------------------------|----------------------------------------------------------------------------------------------------------------------------------------------------------------------------------------------------------------------------------------------------------------------------------------------------------------------------------------------------------------------|----------------------------------------------------------|----------------------------------------------------------------------------------------------------------------------|
|                                                 | undergone gastrointestinal surgery, which might affect the absorption of study materials; significant neurological (epilepsy, mental retardation, or stroke) or medical illnesses (diabetes, hypertension, or cardiovascular diseases); took micronutrient supplements or herbal medicines during the 4 weeks preceding the start of the study; and had compliance less than 70% at each visit, i.e., weeks 2, 4, 8, and 12.                                                                                                    |                                                                                                                                                                                 |                                                                                                                                                                                                                                                                                                                                                                      |                                                          |                                                                                                                      |
| Dawe et al. <sup>6</sup><br>2020<br>New Zealand | <p><b>Study design:</b> RCT</p> <p><b>Dates of recruitment:</b><br/>April 2015 – June 2017</p> <p><b>Inclusion Criteria:</b> Women were eligible and approached to participate in the study if they had a singleton pregnancy, were between 12°–17 weeks and 6 day’s gestation, had a BMI of ≥30.0 kg/m2, and were able to provide informed written consent.</p> <p><b>Exclusion Criteria:</b> pre-existing diabetes or an HbA1c (average blood glucose) of ≥50 mmol/mol at time of recruitment, had known fetal congenital</p> | <p><b>Intervention</b><br/>n= 88 (females: 88)<br/><br/>Mean age (SD): 30.06 (5.51)</p> <hr/> <p><b>Control</b><br/>n= 76 (females: 76)<br/><br/>Mean age (SD):29.39 (5.39)</p> | <p><b>Type:</b> <i>Lactobacillus rhamnosus</i> GG, <i>Bifidobacterium lactis</i> BB12</p> <p><b>Probiotic Dosage:</b><br/>6.5 x 10<sup>9</sup> CFU per day</p> <p><b>Additional supplement:</b> None</p> <p><b>Probiotic Duration:</b> 12 – 17 weeks gestation to 36 weeks gestation</p> <p><b>Comparator:</b> Placebo</p> <p><b>Additional supplement:</b> None</p> | <ul style="list-style-type: none"> <li>• EPDS</li> </ul> | <ul style="list-style-type: none"> <li>• No statistically significant effect due to treatment identified.</li> </ul> |

|                                              |                                                                                                                                                                                                                                                                                                                                                                                                                                                                                                                                                                                          |                                                                                                                                                                            |                                                                                                                                                                                                                                                                                                                                                                                                                                                                                                                                                                                                                                    |                                                           |                                                                                                                                                                                                                                                                                         |
|----------------------------------------------|------------------------------------------------------------------------------------------------------------------------------------------------------------------------------------------------------------------------------------------------------------------------------------------------------------------------------------------------------------------------------------------------------------------------------------------------------------------------------------------------------------------------------------------------------------------------------------------|----------------------------------------------------------------------------------------------------------------------------------------------------------------------------|------------------------------------------------------------------------------------------------------------------------------------------------------------------------------------------------------------------------------------------------------------------------------------------------------------------------------------------------------------------------------------------------------------------------------------------------------------------------------------------------------------------------------------------------------------------------------------------------------------------------------------|-----------------------------------------------------------|-----------------------------------------------------------------------------------------------------------------------------------------------------------------------------------------------------------------------------------------------------------------------------------------|
|                                              | abnormalities, were already taking probiotic capsules or supplements containing probiotics, had a multiple pregnancy, had received bariatric surgery, were taking medications or had a medical condition that altered glucose metabolism, and/or had severe hyperemesis. Additionally, participants were excluded if they declined to participate or were unable to provide informed written consent                                                                                                                                                                                     |                                                                                                                                                                            |                                                                                                                                                                                                                                                                                                                                                                                                                                                                                                                                                                                                                                    |                                                           |                                                                                                                                                                                                                                                                                         |
| Ghorbani et al. <sup>7</sup><br>2018<br>Iran | <p><b>Study design:</b> RCT</p> <p><b>Dates of recruitment:</b> NR</p> <p><b>Inclusion Criteria:</b> Adult (age 18 to 55 years) outpatients from university hospital psychiatry clinics, who fulfilled the diagnostic and statistical manual of mental disorders fifth edition for moderate depression, were required based on the structured clinical interview; and were treated with concurrent fluoxetine.</p> <p><b>Exclusion Criteria:</b> The following DSM-V diagnoses were excluded: current or past history of schizophrenia and schizotypal personality disorder, bipolar</p> | <p><b>Intervention:</b><br/>n=20 (females: 14)<br/><br/>Mean age (SD): 35.50 (5.27)</p> <p><b>Control:</b><br/>n=20 (females: 14)<br/><br/>Mean age (SD): 34.45 (3.95)</p> | <p><b>Type:</b> <i>Lactobacillus casei</i>, <i>L. acidophilus</i>, <i>L. rhamnosus</i>, <i>Bifidobacterium breve</i>, <i>B. longum</i>, <i>Streptococcus thermophilus</i></p> <p><b>Synbiotic Dosage:</b><br/><i>Lactobacillus casei</i> 3x10<sup>8</sup> CFU/g, <i>L. acidophilus</i> 2x10<sup>8</sup> CFU/g, <i>L. rhamnosus</i> 3x10<sup>8</sup> CFU/g, <i>Bifidobacterium breve</i> 2x10<sup>8</sup> CFU/g, <i>B. longum</i> 10<sup>9</sup> CFU/g, <i>Streptococcus thermophilus</i> 3x10<sup>8</sup> CFU/g</p> <p>100mg fructooligosaccharide</p> <p><b>Synbiotic Duration:</b> 6 weeks</p> <p><b>Comparator:</b> Placebo</p> | <ul style="list-style-type: none"> <li>• HAM-D</li> </ul> | <ul style="list-style-type: none"> <li>• Following the adjustment for gender, age, and BMI at baseline, there was a greater reduction in HAM-D score in probiotic treated patients (Mean±SD: -19.25±1.71) compared to placebo taking group (Mean±SD: 17.75±2.05; P = 0.024).</li> </ul> |

|                                          |                                                                                                                                                                                                                                                                                                                                                                                                                                                                                                                                                                                                                                                                                     |                                                                                                                                                                         |                                                                                                                                                                                                                                                                                                                                                                         |                                                              |                                                                                                                                                                        |
|------------------------------------------|-------------------------------------------------------------------------------------------------------------------------------------------------------------------------------------------------------------------------------------------------------------------------------------------------------------------------------------------------------------------------------------------------------------------------------------------------------------------------------------------------------------------------------------------------------------------------------------------------------------------------------------------------------------------------------------|-------------------------------------------------------------------------------------------------------------------------------------------------------------------------|-------------------------------------------------------------------------------------------------------------------------------------------------------------------------------------------------------------------------------------------------------------------------------------------------------------------------------------------------------------------------|--------------------------------------------------------------|------------------------------------------------------------------------------------------------------------------------------------------------------------------------|
|                                          | disorder, and cognitive disorder in the past year. Participants were excluded whenever they showed a risk of suicide at any time during the study; of if they showed any clinically significant worsening in condition from baseline.                                                                                                                                                                                                                                                                                                                                                                                                                                               |                                                                                                                                                                         | <b>Additional supplement:</b> None                                                                                                                                                                                                                                                                                                                                      |                                                              |                                                                                                                                                                        |
| Hadi et al. <sup>8</sup><br>2019<br>Iran | <p><b>Study design:</b> RCT</p> <p><b>Dates of recruitment:</b><br/>Dec 2018 – Feb 2019</p> <p><b>Inclusion Criteria:</b> men or women between the ages of 20-50 with a body mass index (BMI) greater than 25 and less than 35 kg/m<sup>2</sup>.</p> <p><b>Exclusion Criteria:</b> History of cardiovascular, renal, hepatic, or pancreatic diseases, diabetes, hypertension, inflammatory or infectious disease, neurological or psychiatric disorders, thyroid dysfunctions, and malignancy, if they were following a weight-loss diet or prescribed any weight loss medications during the last year, smoked, were pregnant or lactating, were taking alcohol, herbal drugs,</p> | <p><b>Intervention</b><br/>n= 30 (females:11)<br/><br/>Mean age (SD): 34.49 (6.02)</p> <p><b>Control</b><br/>n= 29 (females:9)<br/><br/>Mean age (SD): 36.64 (7.26)</p> | <p><b>Type:</b> <i>Lactobacillus acidophilus</i>, <i>L. casei</i> and <i>Bifidobacterium bifidum</i></p> <p><b>Synbiotic Dosage:</b><br/>2 x 10<sup>9</sup> CFU per 500 mg capsule, per day</p> <p><b>Additional supplement:</b> 0.8 g inulin</p> <p><b>Synbiotic Duration:</b> 8 weeks</p> <p><b>Comparator:</b> Placebo</p> <p><b>Additional supplement:</b> None</p> | <ul style="list-style-type: none"> <li>• DASS21-D</li> </ul> | <ul style="list-style-type: none"> <li>• After 8 weeks, synbiotics resulted in significant improvements in depression scores compared to the placebo group.</li> </ul> |

|                                               |                                                                                                                                                                                                                                                                                                                                                                                                                                                                                                                                                                                                                                                                                                                  |                                                                                                                                                                                                                                                                 |                                                                                                                                                                                                                                                                                                                                                                                                                                                                                                                                                                                                                                                                                                                                   |                                                            |                                                                                                                                                                                                                                                                                                                                   |
|-----------------------------------------------|------------------------------------------------------------------------------------------------------------------------------------------------------------------------------------------------------------------------------------------------------------------------------------------------------------------------------------------------------------------------------------------------------------------------------------------------------------------------------------------------------------------------------------------------------------------------------------------------------------------------------------------------------------------------------------------------------------------|-----------------------------------------------------------------------------------------------------------------------------------------------------------------------------------------------------------------------------------------------------------------|-----------------------------------------------------------------------------------------------------------------------------------------------------------------------------------------------------------------------------------------------------------------------------------------------------------------------------------------------------------------------------------------------------------------------------------------------------------------------------------------------------------------------------------------------------------------------------------------------------------------------------------------------------------------------------------------------------------------------------------|------------------------------------------------------------|-----------------------------------------------------------------------------------------------------------------------------------------------------------------------------------------------------------------------------------------------------------------------------------------------------------------------------------|
|                                               | antidepressant drugs, prebiotic or probiotic products, or any other supplements/drugs which could interfere with the study objectives.                                                                                                                                                                                                                                                                                                                                                                                                                                                                                                                                                                           |                                                                                                                                                                                                                                                                 |                                                                                                                                                                                                                                                                                                                                                                                                                                                                                                                                                                                                                                                                                                                                   |                                                            |                                                                                                                                                                                                                                                                                                                                   |
| Haghighat et al. <sup>9</sup><br>2019<br>Iran | <p><b>Study design:</b> RCT</p> <p><b>Dates of recruitment:</b> NR</p> <p><b>Inclusion Criteria:</b> clinically stable HD patients with the arteriovenous fistula, aged 30–65, and receiving thrice-weekly HD, attending dialysis centers for at least 3 months before starting the study. Dialysis duration was 3–4.5 h per session, three times per week, with a blood flow of 250 mL/min and a dialysate flow of 500 mL/min.</p> <p><b>Exclusion Criteria:</b> previous kidney transplant or likely to receive a transplant; medically diagnosed severe infections; malignancy; smoking; chronic liver disease; use of a central catheter for hemodialysis access; inflammatory diseases which lasted for</p> | <p><b>Intervention 1 (Probiotic)</b><br/>n= 25 (females: NR)<br/><br/>Mean age (SD): NR</p> <p><b>Intervention 2 (Synbiotic)</b><br/>n= 25 (females: NR)<br/><br/>Mean age (SD): NR</p> <p><b>Control</b><br/>n=25 (females: NR)<br/><br/>Mean age (SD): NR</p> | <p><b>Probiotic Type:</b> <i>Lactobacillus acidophilus</i> strain T16, <i>Bifidobacterium bifidum</i> strain BIA-6, <i>B. lactis</i> strain BIA-7, <i>B. longum</i> strain BIA-8</p> <p><b>Probiotic Dosage:</b><br/>2.7 x 10<sup>7</sup> CFU per sachet</p> <p><b>Additional supplement:</b> None</p> <p><b>Probiotic Duration:</b> 12 weeks</p> <p><b>Synbiotic Type:</b> <i>Lactobacillus acidophilus</i> strain T16, <i>Bifidobacterium bifidum</i> strain BIA-6, <i>B. lactis</i> strain BIA-7, <i>B. longum</i> strain BIA-8; prebiotic 5 g fructo-oligosaccharides (FOS) (b) 5 g galacto-oligosaccharides (GOS) (c) 5 g of inulin</p> <p><b>Additional supplement:</b> None</p> <p><b>Synbiotic Duration:</b> 12 weeks</p> | <ul style="list-style-type: none"> <li>• HADS-D</li> </ul> | <ul style="list-style-type: none"> <li>• From baseline to 12 weeks, synbiotic supplementation resulted in a significant decrease in HADS-D score in a subgroup of patients with depressive symptom (HADS-DEP ≥ 8 at baseline) compared to the placebo and probiotic supplementation (p = .001, p = .002, respectively)</li> </ul> |

|                                                      |                                                                                                                                                                                                                                                                                                                                                                                                                                                                                                       |                                                                                                                                                                                                                                                                        |                                                                                                                                                                                                                                                                                                                                                                                                                                                                          |                                                         |                                                                                                                                                                                                                                      |
|------------------------------------------------------|-------------------------------------------------------------------------------------------------------------------------------------------------------------------------------------------------------------------------------------------------------------------------------------------------------------------------------------------------------------------------------------------------------------------------------------------------------------------------------------------------------|------------------------------------------------------------------------------------------------------------------------------------------------------------------------------------------------------------------------------------------------------------------------|--------------------------------------------------------------------------------------------------------------------------------------------------------------------------------------------------------------------------------------------------------------------------------------------------------------------------------------------------------------------------------------------------------------------------------------------------------------------------|---------------------------------------------------------|--------------------------------------------------------------------------------------------------------------------------------------------------------------------------------------------------------------------------------------|
|                                                      | more than one week during the study; amputated limbs; pregnancy and lactation; any change in drug regimen; using catabolic or antidepressants medications within three month of study commencement; intake of antioxidant vitamin supplements, pre, pro and synbiotic supplements and other forms of probiotics (including probiotic yogurt, kefir, and other fermented foods) and antibiotics within one month of study commencement.                                                                |                                                                                                                                                                                                                                                                        | <b>Comparator:</b> Placebo<br><br><b>Additional supplement:</b> None                                                                                                                                                                                                                                                                                                                                                                                                     |                                                         |                                                                                                                                                                                                                                      |
| Heidarzadeh-Rad et al. <sup>10</sup><br>2020<br>Iran | <p><b>Study design:</b> RCT</p> <p><b>Dates of recruitment:</b> July 2016 – Apr 2018</p> <p><b>Inclusion Criteria:</b> Diagnosed with major depressive disorder, aged between 20 years and 50 years, had a current diagnosis of mild to moderate melancholic depression for at least 1 month, and were taking one of the following anti-depressant medications: fluoxetine, citalopram, amitriptyline, or sertraline.</p> <p><b>Exclusion Criteria:</b> any sensitivity reaction to prebiotic and</p> | <p><b>Intervention 1 (Probiotic)</b><br/>n= 25 (females:20)<br/>Mean age (SD): 37.8 (7.9)</p> <p><b>Intervention 2 (Prebiotic)</b><br/>n= 25 (females:20)<br/>Mean age (SD): 36.6 (8.4)</p> <p><b>Control</b><br/>n= 25 (females:15)<br/>Mean age (SD): 36.0 (8.5)</p> | <p><b>Type:</b> <i>Lactobacillus helveticus</i> R0052 (CNCM strain I-1722) and <i>Bifidobacterium longum</i> R0175 (CNCM strain I-3470)</p> <p><b>Probiotic Dosage:</b> <math>\geq 10 \times 10^9</math> CFU per sachet</p> <p><b>Additional supplement:</b> None</p> <p><b>Probiotic Duration:</b> 8 weeks</p> <p><b>Prebiotic Type:</b> 80% galactaligosaccharide (GOS) powder</p> <p><b>Additional supplement:</b> None</p> <p><b>Prebiotic Duration:</b> 8 weeks</p> | <ul style="list-style-type: none"> <li>• BDI</li> </ul> | <ul style="list-style-type: none"> <li>• After 8 weeks, the change in BDI scores from baseline were significantly different between probiotic and placebo, but not for probiotic and prebiotic, or prebiotic and placebo.</li> </ul> |

|  |                                                                                                                                                                                                                                                                                                                                                                                                                                                                                                                                                                                                                                                                                                                                                                                                                                                                                                                                                                                                                                             |  |                                                                             |  |  |
|--|---------------------------------------------------------------------------------------------------------------------------------------------------------------------------------------------------------------------------------------------------------------------------------------------------------------------------------------------------------------------------------------------------------------------------------------------------------------------------------------------------------------------------------------------------------------------------------------------------------------------------------------------------------------------------------------------------------------------------------------------------------------------------------------------------------------------------------------------------------------------------------------------------------------------------------------------------------------------------------------------------------------------------------------------|--|-----------------------------------------------------------------------------|--|--|
|  | <p>probiotic compounds, refusal to cooperate, any serious changes in diet routine and lifestyle during the study, any changes in medication or its dosage, long term (at least 1 week) inflammatory disease requiring anti-inflammatory pharmacotherapy, pregnancy or lactation, antibiotic intake during the study, history of cancer, diabetes, pancreatitis, or thyroid, kidney, liver, respiratory, or cardiovascular disorders, diagnosis of nutritional allergy by a medical professional, regular consumption of probiotic products within 2 months of study start, dietary supplement intake such as vitamins, antioxidant and/or omega-3's at least 4-6 weeks before the study, alcohol consumption (alcoholism according to Diagnostic and Statistical Manual of Mental Disorders-IV criteria), smoking (at least 5 cigarettes per day during last 6 months or pipe or hookah at least once in last month), opiate addiction or substance abuse, history of heart attack or stroke, following a specific diet, using hormonal</p> |  | <p><b>Comparator:</b> Placebo</p> <p><b>Additional supplement:</b> None</p> |  |  |
|--|---------------------------------------------------------------------------------------------------------------------------------------------------------------------------------------------------------------------------------------------------------------------------------------------------------------------------------------------------------------------------------------------------------------------------------------------------------------------------------------------------------------------------------------------------------------------------------------------------------------------------------------------------------------------------------------------------------------------------------------------------------------------------------------------------------------------------------------------------------------------------------------------------------------------------------------------------------------------------------------------------------------------------------------------|--|-----------------------------------------------------------------------------|--|--|

|                                               |                                                                                                                                                                                                                                                                                                                                                                                                                                                                                                                                                                                                                                                   |                                                                                                                                                                              |                                                                                                                                                                                                                                                                                                                                                                          |                                                           |                                                                                                                                                                                                                  |
|-----------------------------------------------|---------------------------------------------------------------------------------------------------------------------------------------------------------------------------------------------------------------------------------------------------------------------------------------------------------------------------------------------------------------------------------------------------------------------------------------------------------------------------------------------------------------------------------------------------------------------------------------------------------------------------------------------------|------------------------------------------------------------------------------------------------------------------------------------------------------------------------------|--------------------------------------------------------------------------------------------------------------------------------------------------------------------------------------------------------------------------------------------------------------------------------------------------------------------------------------------------------------------------|-----------------------------------------------------------|------------------------------------------------------------------------------------------------------------------------------------------------------------------------------------------------------------------|
|                                               | drugs and who participated in another study in the 2 months preceding the study.                                                                                                                                                                                                                                                                                                                                                                                                                                                                                                                                                                  |                                                                                                                                                                              |                                                                                                                                                                                                                                                                                                                                                                          |                                                           |                                                                                                                                                                                                                  |
| Inoue et al. <sup>11</sup><br>2018<br>Japan   | <p><b>Study design:</b> RCT</p> <p><b>Dates of recruitment:</b> NR</p> <p><b>Inclusion Criteria:</b> Subjects were recruited via announcements to second-year attendees of a weekly stretch training programme for the elderly at a public liberal aft school in the Hyogo prefecture, Japan. Those aged &gt;65 years who had undergone stretch training for the previous 12 months were included.</p> <p><b>Exclusion Criteria:</b> Those who received public health nursing care, had any contraindications to resistance training, or had been diagnosed with dementia by a physician or were undergoing dementia treatment were excluded.</p> | <p><b>Intervention:</b><br/>n= 20 (females:13)<br/><br/>Mean age (SD): 69.9 (3.0)</p> <hr/> <p><b>Control:</b><br/>n= 18 (females:11)<br/><br/>Mean age (SD): 70.9 (3.2)</p> | <p><b>Type:</b> <i>Bifidobacterium longum</i> BB536, <i>B. infantis</i> M-63, <i>B. breve</i> M-16V, and <i>B. breve</i> B-3</p> <p><b>Probiotic Dosage:</b><br/>5 x 10<sup>10</sup> CFU per sachet</p> <p><b>Additional supplement:</b> None</p> <p><b>Probiotic Duration:</b> 12 weeks</p> <p><b>Comparator:</b> Placebo</p> <p><b>Additional supplement:</b> None</p> | <ul style="list-style-type: none"> <li>• PHQ-9</li> </ul> | <ul style="list-style-type: none"> <li>• No statistically significant effect due to treatment identified.</li> </ul>                                                                                             |
| Jamilian et al. <sup>12</sup><br>2018<br>Iran | <p><b>Study design:</b> RCT</p> <p><b>Dates of recruitment:</b><br/>Dec 2017 – Mar 2018</p> <p><b>Inclusion Criteria:</b> Women with PCOS based on the Rotterdam</p>                                                                                                                                                                                                                                                                                                                                                                                                                                                                              | <p><b>Intervention:</b><br/>n= 30 (females: 30)<br/><br/>Mean age (SD): 26.0 (5.3)</p> <hr/> <p><b>Control:</b></p>                                                          | <p><b>Type:</b> <i>Lactobacillus acidophilus</i>, <i>L. reuteri</i>, <i>L. fermentum</i>, <i>Bifidobacterium bifidum</i></p> <p><b>Probiotic Dosage:</b><br/>8 x 10<sup>9</sup> CFU/day</p>                                                                                                                                                                              | <ul style="list-style-type: none"> <li>• BDI</li> </ul>   | <ul style="list-style-type: none"> <li>• Co-administration of probiotic and selenium for 12 weeks to women with PCOS resulted in a significant improvement in BDI compared with the placebo (p=0.003)</li> </ul> |

|                                                     |                                                                                                                                                                                                                                                                                                                                                                                      |                                                                                                 |                                                                                                                                                                                                                                                                                       |                                                         |                                                                                                                                                                |
|-----------------------------------------------------|--------------------------------------------------------------------------------------------------------------------------------------------------------------------------------------------------------------------------------------------------------------------------------------------------------------------------------------------------------------------------------------|-------------------------------------------------------------------------------------------------|---------------------------------------------------------------------------------------------------------------------------------------------------------------------------------------------------------------------------------------------------------------------------------------|---------------------------------------------------------|----------------------------------------------------------------------------------------------------------------------------------------------------------------|
|                                                     | <p>criteria, aged 18 – 40 years old whom were referred to the Kosar Clinic in Arak, Iran, between December and March 2018. Written informed consent was obtained from all participants prior to the intervention.</p> <p><b>Exclusion Criteria:</b> Pregnancy, Adrenal hyperplasia, and rogen-secreting tumors, hyperprolactinemia, thyroid dysfunction, diabetes at enrollment.</p> | <p>n=30 (females:30)</p> <p>Mean age (SD): 25.6 (3.8)</p>                                       | <p><b>Additional supplement:</b><br/>200 µg selenium</p> <p><b>Probiotic Duration:</b> 12 weeks</p> <p><b>Comparator:</b> Placebo</p> <p><b>Additional supplement:</b> None</p>                                                                                                       |                                                         |                                                                                                                                                                |
| <p>Kazemi et al.<sup>13</sup><br/>2018<br/>Iran</p> | <p><b>Study design:</b> RCT</p> <p><b>Dates of recruitment:</b><br/>Jul 2016 – Apr 2017</p> <p><b>Inclusion Criteria:</b> Patients with mild to moderate major depressed patients aged 18 – 50 years who took the anti-depressant drugs: sertraline, fluoxetine, citalopram or</p>                                                                                                   | <p><b>Intervention (Prebiotic):</b><br/>n= 37 (females:)</p> <p>Mean age (SD): 37.35 (7.97)</p> | <p><b>Type:</b><br/><i>Lactobacillus helveticus</i> R0052, <i>Bifidobacterium longum</i> R0175</p> <p><b>Probiotic Dosage:</b> ≥10x10<sup>9</sup> CFU, frequency not specified</p> <p><b>Additional supplement:</b> None</p> <p><b>Prebiotic Type:</b><br/>Galactooligosaccharide</p> | <ul style="list-style-type: none"> <li>• BDI</li> </ul> | <ul style="list-style-type: none"> <li>• Probiotics improved BDI score compared to placebo while prebiotics had no statistically significant effect</li> </ul> |



|  |                                                                                                                                                                                                                                                                                                                                                                                                                                                                                                                                                                                                           |                                                                                                       |                                                                                                                                                                                                                                    |  |  |
|--|-----------------------------------------------------------------------------------------------------------------------------------------------------------------------------------------------------------------------------------------------------------------------------------------------------------------------------------------------------------------------------------------------------------------------------------------------------------------------------------------------------------------------------------------------------------------------------------------------------------|-------------------------------------------------------------------------------------------------------|------------------------------------------------------------------------------------------------------------------------------------------------------------------------------------------------------------------------------------|--|--|
|  | <p>amitriptyline for 3 months or more prior to beginning the trial.</p> <p><b>Exclusion Criteria:</b> History of renal, hepatic, cardiovascular, or respiratory disease; pregnancy and lactation; regular intake of probiotics during last 2 months before recruitment for the study; intake of antioxidant or omega 3 supplements less than 6 weeks before the beginning of the study; alcohol intake; smoking cigarettes (more than 5 during last 6 months) or tobacco (pipe or hookah at least one time during last month); any addiction to opiates; history of heart attack or stroke; following</p> | <p><b>Intervention (Probiotic):</b><br/>n=38 (females: 27)</p> <p>Mean age (SD):<br/>36.15 (7.85)</p> | <p><b>Prebiotic Dosage:</b> 5g sachet, frequency not specified</p> <p><b>Additional supplement:</b> None</p> <p><b>Prebiotic Duration:</b> 8 weeks</p> <p><b>Comparator:</b> Placebo</p> <p><b>Additional supplement:</b> None</p> |  |  |
|--|-----------------------------------------------------------------------------------------------------------------------------------------------------------------------------------------------------------------------------------------------------------------------------------------------------------------------------------------------------------------------------------------------------------------------------------------------------------------------------------------------------------------------------------------------------------------------------------------------------------|-------------------------------------------------------------------------------------------------------|------------------------------------------------------------------------------------------------------------------------------------------------------------------------------------------------------------------------------------|--|--|

|                                               |                                                                                                                                                                                                                                                                                                                                                                                      |                                                                                                                                                                                 |                                                                                                                                                                                                                                                                                                 |       |                                                                    |
|-----------------------------------------------|--------------------------------------------------------------------------------------------------------------------------------------------------------------------------------------------------------------------------------------------------------------------------------------------------------------------------------------------------------------------------------------|---------------------------------------------------------------------------------------------------------------------------------------------------------------------------------|-------------------------------------------------------------------------------------------------------------------------------------------------------------------------------------------------------------------------------------------------------------------------------------------------|-------|--------------------------------------------------------------------|
|                                               | a specific diet; participation in another study during last two months; any significant change in diet and life style; any change in drug regimen; inflammatory diseases which lasted for more than one week during the study; intake of antibiotics during the study. Participants were instructed not to consume any other probiotic supplements during the trial.                 | <b>Control:</b><br>n= 36 (females:24)<br><br>Mean age (SD):36 (8.47)                                                                                                            |                                                                                                                                                                                                                                                                                                 |       |                                                                    |
| Kelly et al. <sup>14</sup><br>2017<br>Ireland | <b>Study design:</b> RCT- Crossover<br><br><b>Dates of recruitment:</b> NR<br><br><b>Inclusion Criteria:</b> Male 18-40 years old; healthy; able to speak English<br><br><b>Exclusion Criteria:</b> Having a significant acute or chronic illness, following a diet or taking a medication that would interfere with the objectives of the study, pose a safety risk or confound the | <b>Intervention/control:</b><br>n=14 (females: 0)<br><br>Mean age (SD): 25.64 (1.14)<br><br><b>Control/intervention:</b><br>n=15 (females: 0)<br><br>Mean age (SD): 23.6 (0.97) | <b>Type:</b> <i>Lactobacillus rhamnosus</i> (JB-1)<br><br><b>Probiotic Dosage:</b> 1 × 10 <sup>9</sup> CFU each capsule 1/ day<br><br><b>Additional supplement:</b> None<br><br><b>Probiotic Duration:</b> 4 weeks<br><br><b>Comparator:</b> Placebo:<br><br><b>Additional supplement:</b> None | • BDI | • No statistically significant effect due to treatment identified. |

|                                           |                                                                                                                                                                                                                                                                                                                                                                                                                                                                                                             |                                                                                                                                                                             |                                                                                                                                                                                                                                                                                                                |                                                                |                                                                                                                      |
|-------------------------------------------|-------------------------------------------------------------------------------------------------------------------------------------------------------------------------------------------------------------------------------------------------------------------------------------------------------------------------------------------------------------------------------------------------------------------------------------------------------------------------------------------------------------|-----------------------------------------------------------------------------------------------------------------------------------------------------------------------------|----------------------------------------------------------------------------------------------------------------------------------------------------------------------------------------------------------------------------------------------------------------------------------------------------------------|----------------------------------------------------------------|----------------------------------------------------------------------------------------------------------------------|
|                                           | interpretation of the study results (e.g., probiotics, antibiotics, antipsychotics, anxiolytics, laxatives, enemas, anti-coagulants and over-the-counter non-steroidal anti-inflammatory (NSAIDS), antidepressants or any other psychotropic medication); people with evidence of immunodeficiency, bleeding disorder or coagulopathy, colour blindness, dyslexia or dyscalculia, or receiving any treatment involving experimental drugs                                                                   |                                                                                                                                                                             |                                                                                                                                                                                                                                                                                                                |                                                                |                                                                                                                      |
| Kim et al. <sup>15</sup><br>2021<br>Korea | <p><b>Study design:</b> RCT</p> <p><b>Dates of recruitment:</b><br/>Mar 2018 – Mar 2019</p> <p><b>Inclusion Criteria:</b> Over 65 years old and to consent to be randomly assigned and refrain from consuming any other dietary supplements, which include other probiotics, yogurts with live, active cultures or supplements, and immune-enhancing supplements, during the period of the study.</p> <p><b>Exclusion Criteria:</b> Use of antibiotics, anti-inflammatory medications, gastrointestinal</p> | <p><b>Intervention</b><br/>n= 27 (females: 17)</p> <p>Mean age (SD): 71.11 (5.02)</p> <hr/> <p><b>Control</b><br/>n= 26 (females:10)</p> <p>Mean age (SD): 72.00 (3.36)</p> | <p><b>Type:</b> <i>Bifidobacterium bifidum</i> BGN4, <i>B. longum</i> BORI</p> <p><b>Probiotic Dosage:</b><br/>1 x 10<sup>9</sup> CFU/day</p> <p><b>Additional supplement:</b> None</p> <p><b>Probiotic Duration:</b> 12 weeks</p> <p><b>Comparator:</b> Placebo</p> <p><b>Additional supplement:</b> None</p> | <ul style="list-style-type: none"> <li>• GDS-Korean</li> </ul> | <ul style="list-style-type: none"> <li>• No statistically significant effect due to treatment identified.</li> </ul> |

|                                               |                                                                                                                                                                                                                                                                                                                                                                                                                                                                                                                                                                                                                                                                                  |                                                                                                                                                              |                                                                                                                                                                                                                                                                                                                                                            |                                                         |                                                                                                                            |
|-----------------------------------------------|----------------------------------------------------------------------------------------------------------------------------------------------------------------------------------------------------------------------------------------------------------------------------------------------------------------------------------------------------------------------------------------------------------------------------------------------------------------------------------------------------------------------------------------------------------------------------------------------------------------------------------------------------------------------------------|--------------------------------------------------------------------------------------------------------------------------------------------------------------|------------------------------------------------------------------------------------------------------------------------------------------------------------------------------------------------------------------------------------------------------------------------------------------------------------------------------------------------------------|---------------------------------------------------------|----------------------------------------------------------------------------------------------------------------------------|
|                                               | medicine within the past 3 months; and with regular intake of probiotics within the past 3 months. Participants who are incapable of living independently based on activities of daily living and instrumental activities of daily living score.                                                                                                                                                                                                                                                                                                                                                                                                                                 |                                                                                                                                                              |                                                                                                                                                                                                                                                                                                                                                            |                                                         |                                                                                                                            |
| Kouchaki et al. <sup>16</sup><br>2017<br>Iran | <p><b>Study design:</b> RCT</p> <p><b>Dates of recruitment:</b><br/>Dec 2015 – Feb 2016</p> <p><b>Inclusion Criteria:</b> Aged between 18 – 55 with clinically definite multiple sclerosis diagnosed according to McDonald criteria and an expanded disability status scale score <math>\leq 4.5</math> referred to the Shahid Beheshti Hospital in Kashan (located in Esfahan province), Iran. Permission to obtain information from database of MS clinic to ensure following criteria were fulfilled: gender, age, at MS onset, RRMS, familial antecedents of MS and no probiotic and/or symbiotic supplementation before measurements.</p> <p><b>Exclusion Criteria:</b></p> | <p><b>Intervention:</b><br/>n= 30 (females:25)<br/>Mean age (SD): 34.4 (9.2)</p> <p><b>Control:</b><br/>n= 30 (females:25)<br/>Mean age (SD): 33.8 (8.9)</p> | <p><b>Type:</b> <i>Lactobacillus acidophilus</i>, <i>L. casei</i>, <i>L. fermentum</i>, <i>Bifidobacterium bifidum</i></p> <p><b>Probiotic Dosage:</b><br/>4 x 10<sup>9</sup> CFU/day</p> <p><b>Additional supplement:</b> None</p> <p><b>Probiotic Duration:</b> 12 weeks</p> <p><b>Comparator:</b> Placebo</p> <p><b>Additional supplement:</b> None</p> | <ul style="list-style-type: none"> <li>• BDI</li> </ul> | <ul style="list-style-type: none"> <li>• Compared with the placebo, probiotic significantly improved BDI scores</li> </ul> |

|                                                 |                                                                                                                                                                                                                                                                                                                                                                                                                                                                                                                                                                                                                                                                                                                                              |                                                                                                                                                                            |                                                                                                                                                                                                                                                                                             |                                                                  |                                                                                                                      |
|-------------------------------------------------|----------------------------------------------------------------------------------------------------------------------------------------------------------------------------------------------------------------------------------------------------------------------------------------------------------------------------------------------------------------------------------------------------------------------------------------------------------------------------------------------------------------------------------------------------------------------------------------------------------------------------------------------------------------------------------------------------------------------------------------------|----------------------------------------------------------------------------------------------------------------------------------------------------------------------------|---------------------------------------------------------------------------------------------------------------------------------------------------------------------------------------------------------------------------------------------------------------------------------------------|------------------------------------------------------------------|----------------------------------------------------------------------------------------------------------------------|
|                                                 | Women who were pregnant or lactating during the past six months, patients bearing nephrolithiasis for the past 5 years, menopausal women with irregular menstruation and unwillingness to utilize appropriate contraceptive tools.                                                                                                                                                                                                                                                                                                                                                                                                                                                                                                           |                                                                                                                                                                            |                                                                                                                                                                                                                                                                                             |                                                                  |                                                                                                                      |
| Lee et al. <sup>17</sup><br>2021<br>South Korea | <p><b>Study design:</b> RCT</p> <p><b>Dates of recruitment:</b><br/>Jul – Sept 2018</p> <p><b>Inclusion Criteria:</b> College students over 20 years of age, with 20 or more natural teeth, and volatile sulfur compound levels <math>\geq 1.5</math> ng/10mL (concentration standard for volatile sulfur compounds that causes discomfort to others)</p> <p><b>Exclusion Criteria:</b> Subjects currently being treated for systemic diseases that may cause halitosis; diagnosed with rhinitis or sinusitis and gastritis; showing adverse reactions to lactose or milk products; regularly using probiotic products or supplements; had taken antibiotics within the last month; has dry mouth, with multiple dental caries or severe</p> | <p><b>Intervention:</b><br/>n= 34 (females:10)<br/><br/>Mean age (SD): 23.44 (2.88)</p> <p><b>Control:</b><br/>n= 28 (females:13)<br/><br/>Mean age (SD): 23.75 (3.42)</p> | <p><b>Type:</b> <i>Weissella cibaria</i></p> <p><b>Probiotic Dosage:</b><br/>1.0 x 10<sup>8</sup> CFU/g in 800mg tablet</p> <p><b>Additional supplement:</b> None</p> <p><b>Probiotic Duration:</b> 8 weeks</p> <p><b>Comparator:</b> Placebo</p> <p><b>Additional supplement:</b> None</p> | <ul style="list-style-type: none"> <li>• Korean CES-D</li> </ul> | <ul style="list-style-type: none"> <li>• No statistically significant effect due to treatment identified.</li> </ul> |

|                                                  |                                                                                                                                                                                                                                                                                                                                                                                                                                                                                       |                                                                                                                                                                                                                |                                                                                                                                                                                                                                                                                                                                                                                                                                                                                                                                                                                                 |                                                                |                                                                                                                                                                                                                       |
|--------------------------------------------------|---------------------------------------------------------------------------------------------------------------------------------------------------------------------------------------------------------------------------------------------------------------------------------------------------------------------------------------------------------------------------------------------------------------------------------------------------------------------------------------|----------------------------------------------------------------------------------------------------------------------------------------------------------------------------------------------------------------|-------------------------------------------------------------------------------------------------------------------------------------------------------------------------------------------------------------------------------------------------------------------------------------------------------------------------------------------------------------------------------------------------------------------------------------------------------------------------------------------------------------------------------------------------------------------------------------------------|----------------------------------------------------------------|-----------------------------------------------------------------------------------------------------------------------------------------------------------------------------------------------------------------------|
|                                                  | periodontal disease; has communication difficulties from hearing or vision problems; uses correction devices after orthodontic treatment; or has tongue problems.                                                                                                                                                                                                                                                                                                                     |                                                                                                                                                                                                                |                                                                                                                                                                                                                                                                                                                                                                                                                                                                                                                                                                                                 |                                                                |                                                                                                                                                                                                                       |
| Lahtinen et al. <sup>18</sup><br>2020<br>Finland | <p><b>Study design:</b> RCT</p> <p><b>Dates of recruitment:</b><br/>Aug 2015 – July 2017</p> <p><b>Inclusion Criteria:</b> Adult patients (18-73 years old), diagnosed by an experienced gastroenterologist to have IBS and remaining symptomatic despite receiving conventional treatments.</p> <p><b>Exclusion Criteria:</b> Unable to provide written informed consent, had an organic gastrointestinal diagnosis such as inflammatory bowel disease or if they were pregnant.</p> | <p><b>Fecal Microbiota Transplant</b><br/>n= 23 (females:12)</p> <p>Mean age (SD): 47.3 (16.8)</p> <hr/> <p><b>Control Autologous Transplant</b><br/>n= 26 (females: 17)</p> <p>Mean age (SD): 46.3 (14.3)</p> | <p><b>Donor:</b> A single universal donor, a young adult male who was in good general health and normal weight was used as the faecal donor. He had been delivered through vaginal childbirth, had not had antibiotics during the previous year, and he was not a health care worker</p> <p><b>Dosage:</b><br/>single colonoscopy with 30 grams of faecal material administered into the caecum</p> <p><b>Additional supplement:</b> None</p> <p><b>Follow-up:</b> 52 weeks</p> <p><b>Comparator:</b> Autologous sample (participant's own stool)</p> <p><b>Additional supplement:</b> None</p> | <ul style="list-style-type: none"> <li>• BDI</li> </ul>        | <ul style="list-style-type: none"> <li>• There were no significant changes in the reported depression scores after the FMT between the placebo and FMT groups or between the time points within the groups</li> </ul> |
| Lew et al. <sup>19</sup><br>2018                 | <b>Study design:</b> RCT                                                                                                                                                                                                                                                                                                                                                                                                                                                              | <b>Intervention:</b><br>n= 52 (females:40)                                                                                                                                                                     | <b>Type:</b> <i>Lactobacillus plantarum</i> P8                                                                                                                                                                                                                                                                                                                                                                                                                                                                                                                                                  | <ul style="list-style-type: none"> <li>• DASS42 – D</li> </ul> |                                                                                                                                                                                                                       |

|                                              |                                                                                                                                                                                                                                                                                                                                                                                                                                                                                                                                                                                                                                                                                      |                                                                                                 |                                                                                                                                                   |        |                                                                                                                      |
|----------------------------------------------|--------------------------------------------------------------------------------------------------------------------------------------------------------------------------------------------------------------------------------------------------------------------------------------------------------------------------------------------------------------------------------------------------------------------------------------------------------------------------------------------------------------------------------------------------------------------------------------------------------------------------------------------------------------------------------------|-------------------------------------------------------------------------------------------------|---------------------------------------------------------------------------------------------------------------------------------------------------|--------|----------------------------------------------------------------------------------------------------------------------|
| Malaysia                                     | <p><b>Dates of recruitment:</b><br/>Oct 2012 – Jan 2013</p> <p><b>Inclusion Criteria:</b> Aged 18 – 60 years old, body mass index within a healthy range, no severe illnesses, willing to commit throughout the experiment, and a score of moderate stress level on Cohen’s Perceived Stress Scale. Written informed consent was obtained from all subjects prior to the start of the study.</p> <p><b>Exclusion Criteria:</b><br/>Type-I diabetes, long term medication due to certain severe illness, HIV/AIDS, and glucose-6-phosphate dehydrogenase deficient, and subjects who, in opinion of the investigator, were not likely to complete the trial for whatever reasons.</p> | <p>Mean age (SD): 31.03 (10.8)</p>                                                              | <p><b>Probiotic Dosage:</b><br/>2.0 x 10<sup>10</sup> CFU/day</p>                                                                                 |        | <ul style="list-style-type: none"> <li>• No statistically significant effect due to treatment identified.</li> </ul> |
| Lyra et al. <sup>20</sup><br>2016<br>Finland | <p><b>Study design:</b> RCT</p> <p><b>Dates of recruitment:</b><br/>Oct 2012 - Nov 2014</p> <p><b>Inclusion Criteria:</b> adults (18-65 years) who were diagnosed with IBS according to Rome III criteria; sufficient general</p>                                                                                                                                                                                                                                                                                                                                                                                                                                                    | <p><b>Low Dose Intervention:</b><br/>n=129 (females: 94)</p> <p>Mean age (SEM): 47.1 (13.3)</p> | <p><b>Type:</b> <i>Lactobacillus acidophilus</i> NCFM (NCFM not defined)</p> <p><b>Probiotic Dosage:</b><br/>Low dose: 10<sup>9</sup> CFU/day</p> | HADS-D | <ul style="list-style-type: none"> <li>• No statistically significant effect due to treatment identified.</li> </ul> |
|                                              |                                                                                                                                                                                                                                                                                                                                                                                                                                                                                                                                                                                                                                                                                      | <p><b>High Dose Intervention:</b><br/>n=131 (females: 104)</p>                                  | <p>High dose: 10<sup>10</sup> CFU/day</p>                                                                                                         |        |                                                                                                                      |

|                                                                                                                                                                                                                                                                                                                                                                                                                                                                                                                                                                                                                                                                                                                                                                                                                                                                                                                                                                                                                                                       |                                                                                          |                                                                                                                                                                  |  |  |
|-------------------------------------------------------------------------------------------------------------------------------------------------------------------------------------------------------------------------------------------------------------------------------------------------------------------------------------------------------------------------------------------------------------------------------------------------------------------------------------------------------------------------------------------------------------------------------------------------------------------------------------------------------------------------------------------------------------------------------------------------------------------------------------------------------------------------------------------------------------------------------------------------------------------------------------------------------------------------------------------------------------------------------------------------------|------------------------------------------------------------------------------------------|------------------------------------------------------------------------------------------------------------------------------------------------------------------|--|--|
| <p>health and orientation for participation in the study, adequate Finnish language skills for being interviewed and completing questionnaires, high likelihood of compliance with and completion of the study, and a body mass index (BMI) between 19 and 35</p> <p><b>Exclusion Criteria:</b><br/>suffering from severe IBS symptoms; participation in a clinical trial with an investigational product (IP) or drug within 3 months prior to the screening; participants who were likely to be noncompliant with the protocol or judged to be unsuitable for study participation by the investigator for any reason, were planning major changes in lifestyle (e.g., diet, dieting, exercise level, travel), had a history of drug or alcohol abuse, were pregnant or breastfeeding, were diagnosed with or suspected of having organic GI disease (e.g., colitis, Crohn’s disease, celiac disease, bowel surgery, recurrent diverticulitis), or had severely impaired general health, including cancer and cancer therapy; lactose-intolerant</p> | <p>Mean age (SEM): 47.2 (12.5)</p>                                                       | <p><b>Additional supplement:</b> None</p> <p><b>Probiotic Duration:</b> 12 weeks</p> <p><b>Comparator:</b> Placebo</p> <p><b>Additional supplement:</b> None</p> |  |  |
|                                                                                                                                                                                                                                                                                                                                                                                                                                                                                                                                                                                                                                                                                                                                                                                                                                                                                                                                                                                                                                                       | <p><b>Control:</b><br/>n=131 (females: 94)</p> <p>Mean age (range): 49.4 (SEM: 12.9)</p> |                                                                                                                                                                  |  |  |



|                                              |                                                                                                                                                                                                                                                                                                                                                                                                                                                                                                                                                                                                                                                                                                                |                                                                                                                                      |                                                                                                                                                                                                  |                                                                                             |                                                                                                                                                                                                                                                           |
|----------------------------------------------|----------------------------------------------------------------------------------------------------------------------------------------------------------------------------------------------------------------------------------------------------------------------------------------------------------------------------------------------------------------------------------------------------------------------------------------------------------------------------------------------------------------------------------------------------------------------------------------------------------------------------------------------------------------------------------------------------------------|--------------------------------------------------------------------------------------------------------------------------------------|--------------------------------------------------------------------------------------------------------------------------------------------------------------------------------------------------|---------------------------------------------------------------------------------------------|-----------------------------------------------------------------------------------------------------------------------------------------------------------------------------------------------------------------------------------------------------------|
|                                              | volunteers not following a non-lactose diet; any previous allergic reaction to any substance in the study product; patients taking medications that could affect the outcomes, including anticholinergic medications, antibiotics (including use during the 3 months prior to the start of the study), pain medications that contained opiates or morphine, weight loss medication, misoprostol, 5-HT3 receptor antagonists, antacids with magnesium or aluminum, diarrhea medication, medication that accelerates the emptying of the stomach, sulfasalazine, laxatives, cholestyramine, cytostatics, biological medications, oral steroids (3 months prior to and during the study), and probiotic products. |                                                                                                                                      |                                                                                                                                                                                                  |                                                                                             |                                                                                                                                                                                                                                                           |
| Majeed et al. <sup>21</sup><br>2018<br>India | <p><b>Study design:</b> RCT</p> <p><b>Dates of recruitment:</b><br/>Jun 2015 – Oct 2015</p> <p><b>Inclusion Criteria:</b> Male or female aged between 20 and 65 years; Fulfilling Rome III Diagnostic Criteria (30) for Func-</p>                                                                                                                                                                                                                                                                                                                                                                                                                                                                              | <p><b>Intervention:</b><br/>n= 20 (females:17)</p> <p>Mean age (SD): 40.36 (10.28)</p> <p><b>Control:</b><br/>n= 20 (females:17)</p> | <p><b>Type:</b> <i>Bacillus coagulans</i></p> <p><b>Probiotic Dosage:</b><br/>2 x 10<sup>9</sup> CFU/day</p> <p><b>Additional supplement:</b> None</p> <p><b>Probiotic Duration:</b> 90 Days</p> | <ul style="list-style-type: none"> <li>• HAM-D</li> <li>• MADRS</li> <li>• CES-D</li> </ul> | <ul style="list-style-type: none"> <li>• Significant change (p=0.01) due to probiotic was observed for the Hamilton Rating Scale for Depression, Montgomery- Åsberg Depression Scale, and Centre for Epidemiological Studies-Depression Scale.</li> </ul> |

|  |                                                                                                                                                                                                                                                                                                                                                                                                                                                                                                                                                                                                                                                                                                                                                                                                                                                                                                                                                                                                               |                                    |                                                                             |  |  |
|--|---------------------------------------------------------------------------------------------------------------------------------------------------------------------------------------------------------------------------------------------------------------------------------------------------------------------------------------------------------------------------------------------------------------------------------------------------------------------------------------------------------------------------------------------------------------------------------------------------------------------------------------------------------------------------------------------------------------------------------------------------------------------------------------------------------------------------------------------------------------------------------------------------------------------------------------------------------------------------------------------------------------|------------------------------------|-----------------------------------------------------------------------------|--|--|
|  | <p>tional IBS for the last 3 months with symptom onset at least 6 months prior to diagnosis:</p> <p>a. Discomfort or recurrent abdominal pain at least 3 days/month in the last 3 months associated with two or more of the following: improvement with defecation, stool frequency change and change in appearance of stool</p> <p>b. Bloating or visible distension at least 3 days/month in the last 3 months</p> <p>c. Watery or loose stools without pain occurring in at least 75% of stools</p> <p>Willingness to follow the protocol requirement as evidenced by written informed consent; Diagnosed patients with mild to moderate IBS in severity with possible sleep, pain and dementia-associated co-morbidities.</p> <p>Fulfilling Diagnostic and Statistical Manual of Mental Disorders, 4th Edition (2000) Criteria for MDD; Willingness to complete subject diaries and study questionnaires; Agree not to use any medication (prescription and over the counter), including vitamins and</p> | <p>Mean age (SD): 43.88 (9.85)</p> | <p><b>Comparator:</b> Placebo</p> <p><b>Additional supplement:</b> None</p> |  |  |
|--|---------------------------------------------------------------------------------------------------------------------------------------------------------------------------------------------------------------------------------------------------------------------------------------------------------------------------------------------------------------------------------------------------------------------------------------------------------------------------------------------------------------------------------------------------------------------------------------------------------------------------------------------------------------------------------------------------------------------------------------------------------------------------------------------------------------------------------------------------------------------------------------------------------------------------------------------------------------------------------------------------------------|------------------------------------|-----------------------------------------------------------------------------|--|--|

|  |                                                                                                                                                                                                                                                                                                                                                                                                                                                                                                                                                                                                                                                                                                                                                                                                                                                                                                                                                                                                                                                            |  |  |  |  |
|--|------------------------------------------------------------------------------------------------------------------------------------------------------------------------------------------------------------------------------------------------------------------------------------------------------------------------------------------------------------------------------------------------------------------------------------------------------------------------------------------------------------------------------------------------------------------------------------------------------------------------------------------------------------------------------------------------------------------------------------------------------------------------------------------------------------------------------------------------------------------------------------------------------------------------------------------------------------------------------------------------------------------------------------------------------------|--|--|--|--|
|  | <p>minerals, during the course of this study; Agree not to use any yogurt during the course of this study; Subjects whose blood chemistries are within a normal range or not considered clinically significant if outside the normal range; Subject's assurance that they have not taken antibiotics or other supplements whose primary site of action is in the gastrointestinal tract for a period up to 1 month prior to the start of the study; Willing to come for regular follow-up visit.</p> <p><b>Exclusion Criteria:</b> Any clinically significant medical history, medical finding or an ongoing medical condition exists which in the opinion of the investigator could jeopardise the safety of the subject, impact validity of the study results or interfere with the completion of study according to the protocol; Significant abnormal findings as determined by baseline history, physical examination, vital signs, haematology, serum chemistry and urinalysis; History or presence of significant alcoholism or supplement/drug</p> |  |  |  |  |
|--|------------------------------------------------------------------------------------------------------------------------------------------------------------------------------------------------------------------------------------------------------------------------------------------------------------------------------------------------------------------------------------------------------------------------------------------------------------------------------------------------------------------------------------------------------------------------------------------------------------------------------------------------------------------------------------------------------------------------------------------------------------------------------------------------------------------------------------------------------------------------------------------------------------------------------------------------------------------------------------------------------------------------------------------------------------|--|--|--|--|

|                                               |                                                                                                                                                                                                                                                                                                                                                                                                                                                                                                                                                                                                                                                                                                                                |                                                                                                                                  |                                                                                                                                                                                                                                 |                                                                              |                                                                                                                                                                                            |
|-----------------------------------------------|--------------------------------------------------------------------------------------------------------------------------------------------------------------------------------------------------------------------------------------------------------------------------------------------------------------------------------------------------------------------------------------------------------------------------------------------------------------------------------------------------------------------------------------------------------------------------------------------------------------------------------------------------------------------------------------------------------------------------------|----------------------------------------------------------------------------------------------------------------------------------|---------------------------------------------------------------------------------------------------------------------------------------------------------------------------------------------------------------------------------|------------------------------------------------------------------------------|--------------------------------------------------------------------------------------------------------------------------------------------------------------------------------------------|
|                                               | abuse in the past 1 year; Any medical or surgical conditions which might significantly interfere with the gastrointestinal tract, liver, kidneys and/or blood-forming organs; History of cardiovascular, renal, hepatic, asthma, glaucoma, pulmonary, neurologic, metabolic or psychiatric disease; Participation in a clinical study during the preceding 90 days; History of malignancy or other serious disease; Any contraindication to blood sampling; Smoking or consumption of tobacco products; Blood or blood products donated in past 30 days prior to study supplement administration; Pregnant female subjects and lactating women; Prior surgical therapy for obesity; Patients using yogurt in their daily meal. |                                                                                                                                  |                                                                                                                                                                                                                                 |                                                                              |                                                                                                                                                                                            |
| Marotta et al. <sup>22</sup><br>2019<br>Italy | <p><b>Study design:</b> RCT</p> <p><b>Dates of recruitment:</b><br/>Nov 2016 – Jun 2017</p> <p><b>Inclusion Criteria:</b> Between ages 18 – 35.</p> <p><b>Exclusion Criteria:</b> Psychiatric or</p>                                                                                                                                                                                                                                                                                                                                                                                                                                                                                                                           | <p><b>Intervention:</b><br/>n= 18 (females:7)</p> <p>Mean age (SD): 21.61 (2.2)</p> <p><b>Control:</b><br/>n= 15 (females:5)</p> | <p><b>Type:</b> <i>Lactobacillus fermentum</i> LF16 (DSM26956), <i>L. rhamnosus</i> LR06 (DSM 21981), <i>L. plantarum</i> LP01 (LMG P-21021), <i>Bifidobacterium longum</i> BL04 (DSM23233)</p> <p><b>Probiotic Dosage:</b></p> | <ul style="list-style-type: none"> <li>• BDI-2</li> <li>• LEIDS-R</li> </ul> | <ul style="list-style-type: none"> <li>• No significant between-group difference found for BDI-2</li> <li>• Overall score for LEIDS-R not calculated or tested for significance</li> </ul> |

|                                                  |                                                                                                                                                                                                                                                                                                                                                                                                                                                                                                                                                                                                                                      |                                                                                                                                                          |                                                                                                                                                                                                                                                                                                                                              |          |                                                                    |
|--------------------------------------------------|--------------------------------------------------------------------------------------------------------------------------------------------------------------------------------------------------------------------------------------------------------------------------------------------------------------------------------------------------------------------------------------------------------------------------------------------------------------------------------------------------------------------------------------------------------------------------------------------------------------------------------------|----------------------------------------------------------------------------------------------------------------------------------------------------------|----------------------------------------------------------------------------------------------------------------------------------------------------------------------------------------------------------------------------------------------------------------------------------------------------------------------------------------------|----------|--------------------------------------------------------------------|
|                                                  | neurological disorders, celiac disease, lactose intolerance, or allergies or other ongoing illnesses (i.e. irritable bowel syndrome, diabetes, ulcerative colitis, etc.) or recent antibiotic treatment (i.e., <3months before the beginning of the study) and participants who smoked more than 10 cigarettes per day.                                                                                                                                                                                                                                                                                                              | Mean age (SD): 21.67 (2.19)                                                                                                                              | 4 x 10 <sup>9</sup> CFU/day<br><br><b>Additional supplement:</b> None<br><br><b>Probiotic Duration:</b> 6 weeks<br><br><b>Comparator:</b> Placebo<br><br><b>Additional supplement:</b> None                                                                                                                                                  |          |                                                                    |
| Messaoudi et al. <sup>23</sup><br>2011<br>France | <b>Study design:</b> RCT<br><br><b>Dates of recruitment:</b> NR<br><br><b>Inclusion Criteria:</b> healthy adults from general population; standard biological safety parameters and a score of ≤ 12 in the HADS-anxiety subscale (HADS-A) and in the HADS-depression subscale (HADS-D) and ≤ 20 in the HADS total score on initial examination<br><br><b>Exclusion Criteria:</b> suffering from neurological, psychiatric, renal, hepatic, cardiovascular and respiratory diseases, or food allergy; taking psychotropic drugs during the previous month; stimulating nutritional supplements (vitamin C), ginger, guarana, ginseng, | <b>Intervention:</b><br>n= 26 (females:19)<br><br>Mean age (SD): 42.4 (7.5)<br><br><b>Control:</b><br>n= 29 (females:22)<br><br>Mean age (SD):43.2 (8.5) | <b>Type:</b> <i>Lactobacillus helveticus</i> R0052 and <i>Bifidobacterium longum</i> R0175<br><br><b>Probiotic Dosage:</b><br>3 x 10 <sup>9</sup> CFU per stick; 1 stick/day<br><br><b>Additional supplement:</b> None<br><br><b>Probiotic Duration:</b> 30 Days<br><br><b>Comparator:</b> Placebo<br><br><b>Additional supplement:</b> None | • HADS-D | • No statistically significant effect due to treatment identified. |

|                                               |                                                                                                                                                                                                                                                                                                                                                                                                                                                                                                                                  |                                                                                                                                                                            |                                                                                                                                                                                                                                                                                                                                                                               |                                                                          |                                                                                                                                            |
|-----------------------------------------------|----------------------------------------------------------------------------------------------------------------------------------------------------------------------------------------------------------------------------------------------------------------------------------------------------------------------------------------------------------------------------------------------------------------------------------------------------------------------------------------------------------------------------------|----------------------------------------------------------------------------------------------------------------------------------------------------------------------------|-------------------------------------------------------------------------------------------------------------------------------------------------------------------------------------------------------------------------------------------------------------------------------------------------------------------------------------------------------------------------------|--------------------------------------------------------------------------|--------------------------------------------------------------------------------------------------------------------------------------------|
|                                               | dehydroepiandrosterone, melatonin, antioxidants, anxiolytics, antidepressants, selenium, narcotics, replacement hormones, more than 5 cups of coffee or tea/day; 0-2 litres of cola, 30-40 g of chocolate, three glasses of wine, or two fermented dairy products; smoking more than twenty cigarettes; Pregnant women and subjects who had participated in another clinical study over the past 2 months                                                                                                                        |                                                                                                                                                                            |                                                                                                                                                                                                                                                                                                                                                                               |                                                                          |                                                                                                                                            |
| Miyaoka et al. <sup>24</sup><br>2018<br>Japan | <p><b>Study design:</b> RCT</p> <p><b>Dates of Recruitment:</b> NR</p> <p><b>Inclusion Criteria:</b> Patients experiencing symptoms of TRD according to the Diagnostic and Statistical Manual of Mental Disorders, Fourth Edition, Text Revision, were enrolled in this study. Diagnosis of TRD was based on chart reviews and defined as an inadequate or nonresponse to 2 or more 8-week trials with 2 different classes of antidepressants. All patients were taking selective-serotonin reuptake inhibitor or serotonin-</p> | <p><b>Intervention:</b><br/>n=20 (females: 12)</p> <p>Mean age (SD): 44.2 (15.6)</p> <hr/> <p><b>Control:</b><br/>n=20 (females: 12)</p> <p>Mean age (SD): 41.9 (14.2)</p> | <p><b>Type:</b> <i>Clostridium butyricum</i> MIYAIRI 588</p> <p><b>Probiotic Dosage:</b><br/>20 mg orally twice daily for the first week and 20 mg orally three times daily from weeks 2 to 8</p> <p><b>Additional supplement:</b> SSRI or SNRI</p> <p><b>Probiotic Duration:</b><br/>8 weeks</p> <p><b>Comparator:</b> Placebo</p> <p><b>Additional supplement:</b> None</p> | <ul style="list-style-type: none"> <li>• HAM-D</li> <li>• BDI</li> </ul> | <ul style="list-style-type: none"> <li>• In combination with antidepressants, the probiotic studied offered significant benefit</li> </ul> |

|                                      |                                                                                                                                                                                                                                                                                                                                                                                                                                                                                                                                                                                                                                                                                                                                                                                                                                                                                                                     |                                                         |                                                            |                                                                             |  |
|--------------------------------------|---------------------------------------------------------------------------------------------------------------------------------------------------------------------------------------------------------------------------------------------------------------------------------------------------------------------------------------------------------------------------------------------------------------------------------------------------------------------------------------------------------------------------------------------------------------------------------------------------------------------------------------------------------------------------------------------------------------------------------------------------------------------------------------------------------------------------------------------------------------------------------------------------------------------|---------------------------------------------------------|------------------------------------------------------------|-----------------------------------------------------------------------------|--|
|                                      | <p>noradrenalin reuptake inhibitor medications, including fluvoxamine, paroxetine, escitalopram, sertraline, duloxetine, and milnacipram.</p> <p><b>Exclusion Criteria:</b> Patients were excluded if they met the criteria for an Axis I diagnosis of delirium, dementia, or other cognitive disorder, bipolar disorder, schizophrenia or other psychotic disorder, or a clinically significant Axis II diagnosis of obsessive-compulsive, schizoid, schizotypal, paranoid, antisocial, or histrionic personality disorder. Patients were also excluded if they acknowledged substance abuse or dependence within the past 6 months, or if they were pregnant, were nursing, or posed a significant risk of suicide during the study period. Patients with chronic deteriorating illnesses such as diabetes, human immunodeficiency virus, gastrointestinal disease, and seizure disorders were also excluded.</p> |                                                         |                                                            |                                                                             |  |
| Moloney et al. <sup>25</sup><br>2021 | <p><b>Study design:</b> Crossover RCT</p> <p><b>Dates of recruitment:</b> NR</p>                                                                                                                                                                                                                                                                                                                                                                                                                                                                                                                                                                                                                                                                                                                                                                                                                                    | <p><b>Intervention/Control:</b><br/>n=8 (females:0)</p> | <p><b>Type:</b> <i>Bifidobacterium longum</i><br/>1714</p> | <ul style="list-style-type: none"> <li>• BDI-2</li> <li>• HADS-D</li> </ul> |  |

|         |                                                                                                                                                                                                                                                                                                                                                                                                                                                                                                                                                                                                                                                                                                                                                                                                                                                                                                                                                                                                                   |                                                                                                                         |                                                                                                                                                                                                                         |  |                                                                                                                      |
|---------|-------------------------------------------------------------------------------------------------------------------------------------------------------------------------------------------------------------------------------------------------------------------------------------------------------------------------------------------------------------------------------------------------------------------------------------------------------------------------------------------------------------------------------------------------------------------------------------------------------------------------------------------------------------------------------------------------------------------------------------------------------------------------------------------------------------------------------------------------------------------------------------------------------------------------------------------------------------------------------------------------------------------|-------------------------------------------------------------------------------------------------------------------------|-------------------------------------------------------------------------------------------------------------------------------------------------------------------------------------------------------------------------|--|----------------------------------------------------------------------------------------------------------------------|
| Ireland | <p><b>Inclusion Criteria:</b> Ability to give written informed consent, be between 18 and 30 years of age; be male; be in generally good health as determined by the investigator</p> <p><b>Exclusion Criteria:</b> Being less than 18 and greater than 40 years of age; having a significant acute or chronic illness; having a condition or taking a medication that would interfere with the objectives of the study, pose a safety risk or confound the interpretation of the study results – subjects should have a wash-out period of 4 weeks; current prebiotic or probiotic use – subjects should have a wash-out period of 4 weeks; excessive use of vitamin D supplementation; not being fluent in English; having dyslexia or dyscalculia; being a current or past smoker; being considered to be poor attendees or unlikely for any reason to be able to comply with the trial; using treatment involving experimental drugs – participation in a trial should be completed not less than 30 days</p> | <p>Mean age (SD):20.7 (0.28)</p> <p><b>Control/Intervention:</b> n=12 (females:0)</p> <p>Mean age (SD): 20.7 (0.28)</p> | <p><b>Probiotic Dosage:</b> 1x10<sup>9</sup>CFU/day</p> <p><b>Additional supplement:</b> None</p> <p><b>Probiotic Duration:</b> 8 weeks</p> <p><b>Comparator:</b> Placebo</p> <p><b>Additional supplement:</b> None</p> |  | <ul style="list-style-type: none"> <li>• No statistically significant effect due to treatment identified.</li> </ul> |
|---------|-------------------------------------------------------------------------------------------------------------------------------------------------------------------------------------------------------------------------------------------------------------------------------------------------------------------------------------------------------------------------------------------------------------------------------------------------------------------------------------------------------------------------------------------------------------------------------------------------------------------------------------------------------------------------------------------------------------------------------------------------------------------------------------------------------------------------------------------------------------------------------------------------------------------------------------------------------------------------------------------------------------------|-------------------------------------------------------------------------------------------------------------------------|-------------------------------------------------------------------------------------------------------------------------------------------------------------------------------------------------------------------------|--|----------------------------------------------------------------------------------------------------------------------|



|                                             |                                                                                                                                                                                                                                                                                                                                                                                                    |                                                                                                                                                                                                             |                                                                                                                                                                                                                                                                                              |                                                           |                                                                                                                                                                                                                                                                             |
|---------------------------------------------|----------------------------------------------------------------------------------------------------------------------------------------------------------------------------------------------------------------------------------------------------------------------------------------------------------------------------------------------------------------------------------------------------|-------------------------------------------------------------------------------------------------------------------------------------------------------------------------------------------------------------|----------------------------------------------------------------------------------------------------------------------------------------------------------------------------------------------------------------------------------------------------------------------------------------------|-----------------------------------------------------------|-----------------------------------------------------------------------------------------------------------------------------------------------------------------------------------------------------------------------------------------------------------------------------|
|                                             | prior to this study; and having a malignant disease or any concomitant end-stage organ disease                                                                                                                                                                                                                                                                                                     |                                                                                                                                                                                                             |                                                                                                                                                                                                                                                                                              |                                                           |                                                                                                                                                                                                                                                                             |
| Moludi et al. <sup>26</sup><br>2019<br>Iran | <p><b>Study design:</b> RCT</p> <p><b>Dates of recruitment:</b> April 2018 – Oct 2018</p> <p><b>Inclusion Criteria:</b> Admitted with diagnosis of myocardial infarction who underwent percutaneous coronary intervention with stable conditions</p> <p><b>Exclusion Criteria:</b> Refusal to participate or low ejection fraction (&lt;35%), unsuccessful percutaneous coronary intervention.</p> | <p><b>Intervention:</b><br/>n= 22 (females: 2)<br/><br/>Mean age (SD): 56.7 (9.1)</p> <hr/> <p><b>Control:</b><br/>n= 22 (females: 1)<br/><br/>Mean age (SD): 57.1 (7.8)</p>                                | <p><b>Type:</b> <i>Lactobacillus rhamnosus</i></p> <p><b>Probiotic Dosage:</b><br/>1.6 x 10<sup>9</sup> CFU/day</p> <p><b>Additional supplement:</b><br/>None</p> <p><b>Probiotic Duration:</b><br/>12 weeks</p> <p><b>Comparator:</b> Placebo</p> <p><b>Additional supplement:</b> None</p> | <ul style="list-style-type: none"> <li>• BDI-2</li> </ul> | <ul style="list-style-type: none"> <li>• Significant improvement in BDI-2 scores due to probiotic</li> </ul>                                                                                                                                                                |
| Moludi et al. <sup>27</sup><br>2021<br>Iran | <p><b>Study design:</b> RCT</p> <p><b>Dates of recruitment:</b> NR</p> <p><b>Inclusion Criteria:</b> Subjects aged 18-85 years old with coronary artery disease who agreed to participate in the study</p> <p><b>Exclusion Criteria:</b> End-stage renal disease, undergoing</p>                                                                                                                   | <p><b>Intervention (Probiotic):</b><br/>n= 24 (females: 9)<br/><br/>Mean age (SD): 51.3 (12.7)</p> <hr/> <p><b>Intervention (Prebiotic):</b><br/>n=24 (females: 12)<br/><br/>Mean age (SD): 52.2 (12.8)</p> | <p><b>Probiotic Type:</b> <i>Lactobacillus rhamnosus</i></p> <p><b>Probiotic Dosage:</b><br/>1.9 x 10<sup>9</sup> CFU/day</p> <p><b>Additional supplement:</b><br/>None</p> <p><b>Probiotic Duration:</b><br/>8 weeks</p>                                                                    | <ul style="list-style-type: none"> <li>• BDI-2</li> </ul> | <ul style="list-style-type: none"> <li>• Co-supplementation of probiotics and inulin in CAD subjects for 8 weeks had beneficial effects on depression. Adding inulin to probiotic supplements improved outcomes more effectively than two supplements separately</li> </ul> |

|                                                    |                                                                                                                                                                                                                                                                                                                                                                                                                                                                 |                                                                                                                                                                                 |                                                                                                                                                                                                                                                                                                                                         |                                                         |                                                                                                                                             |
|----------------------------------------------------|-----------------------------------------------------------------------------------------------------------------------------------------------------------------------------------------------------------------------------------------------------------------------------------------------------------------------------------------------------------------------------------------------------------------------------------------------------------------|---------------------------------------------------------------------------------------------------------------------------------------------------------------------------------|-----------------------------------------------------------------------------------------------------------------------------------------------------------------------------------------------------------------------------------------------------------------------------------------------------------------------------------------|---------------------------------------------------------|---------------------------------------------------------------------------------------------------------------------------------------------|
|                                                    | corticosteroid, immunosuppressive, anti-inflammatory, or anti-depressant drugs; a history of dietary supplements including Pre/Pro-biotics, antioxidants, or vitamins at least two months prior were excluded from the study                                                                                                                                                                                                                                    | <p><b>Intervention (Synbiotic):</b><br/>n=24 (females: 9)</p> <p>Mean age (SD): 49.1 (11.2)</p> <p><b>Control:</b><br/>n= 24 (females: 8)</p> <p>Mean age (SD): 51.8 (12.2)</p> | <p><b>Prebiotic Type:</b> Inulin</p> <p><b>Prebiotic Dosage:</b> 15g/day</p> <p><b>Additional supplement:</b><br/>None</p> <p><b>Synbiotic Type:</b> Combination of probiotic and prebiotic interventions</p> <p><b>Additional supplement:</b><br/>None</p> <p><b>Comparator:</b> Placebo</p> <p><b>Additional supplement:</b> None</p> |                                                         |                                                                                                                                             |
| Ostadmohamadi et al. <sup>28</sup><br>2019<br>Iran | <p><b>Study design:</b> RCT</p> <p><b>Dates of recruitment:</b> NR</p> <p><b>Inclusion Criteria:</b> Women with polycystic ovary syndrome, diagnosed based on the Rotterdam criteria, with the body mass index (BMI) in the range of 17-34kg/m<sup>2</sup> and insulin resistance in the range of 1.4-4, aged 18 – 40 years old whom referred to the Naghavi Clinic in Kashan, Iran, between July and October 2018. Written informed consent was taken from</p> | <p><b>Intervention:</b><br/>n= 30 (females: 30)</p> <p>Mean age (SD): 24.4 (4.7)</p> <p><b>Control:</b><br/>n= 30 (females: 30)</p> <p>Mean age (SD): 25.4 (5.1)</p>            | <p><b>Type:</b> <i>Lactobacillus acidophilus, Bifidobacterium bifidum, L. reuteri, L fermentum</i></p> <p><b>Probiotic Dosage:</b><br/>8 x 10<sup>9</sup> CFU/day</p> <p><b>Additional supplement:</b><br/>50,000 IU Vitamin D</p> <p><b>Probiotic Duration:</b><br/>12 weeks</p> <p><b>Comparator:</b> Placebo</p>                     | <ul style="list-style-type: none"> <li>• BDI</li> </ul> | <ul style="list-style-type: none"> <li>• Vitamin D and probiotic co-administration for 12 weeks significantly reduced BDI scores</li> </ul> |

|                                                                          |                                                                                                                                                                                                                                                                                                                                                                                                                                                                                                                                                                           |                                                                                                                                                                              |                                                                                                                                                                                                                                                                                  |                                                            |                                                                                                                      |
|--------------------------------------------------------------------------|---------------------------------------------------------------------------------------------------------------------------------------------------------------------------------------------------------------------------------------------------------------------------------------------------------------------------------------------------------------------------------------------------------------------------------------------------------------------------------------------------------------------------------------------------------------------------|------------------------------------------------------------------------------------------------------------------------------------------------------------------------------|----------------------------------------------------------------------------------------------------------------------------------------------------------------------------------------------------------------------------------------------------------------------------------|------------------------------------------------------------|----------------------------------------------------------------------------------------------------------------------|
|                                                                          | <p>participants prior to the initiation of the trial.</p> <p><b>Exclusion Criteria:</b> Pregnancy, lactation, adrenal hyperplasia, androgen-secreting tumor, hyperprolactinemia, thyroid dysfunction, and diabetes, women with psychological or psychiatric comorbidities such as anxiety or depressive symptoms at the enrollment.</p>                                                                                                                                                                                                                                   |                                                                                                                                                                              | <b>Additional supplement:</b> None                                                                                                                                                                                                                                               |                                                            |                                                                                                                      |
| <p>Östlund-Lagerström et al.<sup>29</sup><br/>2016<br/>United States</p> | <p><b>Study design:</b> RCT</p> <p><b>Dates of recruitment:</b><br/>Jan 2013 – Mar 2013</p> <p><b>Inclusion Criteria:</b> free-living, older adults (≥ 65 years) representing the general population in Orebro, Sweden. Informed consent signed by the participant and mentally and physically fit to complete questionnaires during the study period.</p> <p><b>Exclusion Criteria:</b> Any known gastrointestinal disease, with strictures, malignance's and ischemia, inflammatory bowel diseases, Participation in other clinical trials in the past three months</p> | <p><b>Intervention:</b><br/>n= 125 (females:71)<br/><br/>Mean age (SD): 72.6 (5.8)</p> <hr/> <p><b>Control:</b><br/>n= 124 (females:81)<br/><br/>Mean age (SD): 72 (5.6)</p> | <p><b>Type:</b> <i>Lactobacillus reuteri</i></p> <p><b>Probiotic Dosage:</b><br/>1 x 10<sup>8</sup> CFU/day</p> <p><b>Additional supplement:</b> None</p> <p><b>Probiotic Duration:</b> 12 weeks</p> <p><b>Comparator:</b> Placebo</p> <p><b>Additional supplement:</b> None</p> | <ul style="list-style-type: none"> <li>• HADS-D</li> </ul> | <ul style="list-style-type: none"> <li>• No statistically significant effect due to treatment identified.</li> </ul> |

|                                                              |                                                                                                                                                                                                                                                                                                                                                                                                                                                                                                                                                                                                                                                                                                                                                                                                                                                                                                                                                                  |                                                                                                                                                                                                                                                                     |                                                                                                                                                                                                                                                                                                                                                                                                                                                                                                                                                                      |                                                                            |                                                                                                                      |
|--------------------------------------------------------------|------------------------------------------------------------------------------------------------------------------------------------------------------------------------------------------------------------------------------------------------------------------------------------------------------------------------------------------------------------------------------------------------------------------------------------------------------------------------------------------------------------------------------------------------------------------------------------------------------------------------------------------------------------------------------------------------------------------------------------------------------------------------------------------------------------------------------------------------------------------------------------------------------------------------------------------------------------------|---------------------------------------------------------------------------------------------------------------------------------------------------------------------------------------------------------------------------------------------------------------------|----------------------------------------------------------------------------------------------------------------------------------------------------------------------------------------------------------------------------------------------------------------------------------------------------------------------------------------------------------------------------------------------------------------------------------------------------------------------------------------------------------------------------------------------------------------------|----------------------------------------------------------------------------|----------------------------------------------------------------------------------------------------------------------|
| <p>Papalini et al.<sup>30</sup><br/>2019<br/>Netherlands</p> | <p><b>Study design:</b> RCT</p> <p><b>Dates of recruitment:</b> NR</p> <p><b>Inclusion Criteria:</b> Right handed, healthy female volunteers aged between 18 and 40 years old, using (oral or intra-uterine) hormonal contraceptives, with a healthy weight, i.e. a body mass index between 18 and 25. They were not in the “stop week” of oral contraceptives during test session to ensure similar hormone levels between both sessions across participants.</p> <p><b>Exclusion Criteria:</b> personal history of psychiatric, neurological, gastrointestinal, endocrine disorders, and relevant medical history; regular medication use; pre- and pro supplementation; smoking; use of antibiotics within two months before the start of the study; lactose intolerance; on a vegan diet; those with a high alcohol intake (i.e. more than 10 glasses of any alcoholic drink per week); patients who changed their diet within three months of the first</p> | <p><b>Intervention:</b><br/>n= 29 (females:29)<br/><br/>Mean age (SEM): 21 (0.4)</p> <hr/> <p><b>Control:</b><br/>n= 29 (females:29)<br/><br/>Mean age (SEM): 22 (0.5)</p> <hr/> <p><b>Control:</b><br/>n= 20 (females: 12)<br/><br/>Mean age (SD): 21.5 (10.1)</p> | <p><b>Type:</b> Ecologic® barrier consisted of the following bacterial strains:<br/><i>Bifidobacterium bifidum</i> W23, <i>B. lactis</i> W51, <i>B. lactis</i> W52, <i>Lactobacillus acidophilus</i> W37, <i>L. brevis</i> W63, <i>L. casei</i> W56, <i>L. salivarius</i> W24, <i>L. lactis</i> W19 and, <i>L. lactis</i> W58</p> <p><b>Probiotic Dosage:</b><br/>5 x 10<sup>9</sup> CFU/day</p> <p><b>Additional supplement:</b> None</p> <p><b>Probiotic Duration:</b><br/>4 weeks</p> <p><b>Comparator:</b> Placebo</p> <p><b>Additional supplement:</b> None</p> | <ul style="list-style-type: none"> <li>• BDI</li> <li>• LEIDS-R</li> </ul> | <ul style="list-style-type: none"> <li>• No statistically significant effect due to treatment identified.</li> </ul> |
|--------------------------------------------------------------|------------------------------------------------------------------------------------------------------------------------------------------------------------------------------------------------------------------------------------------------------------------------------------------------------------------------------------------------------------------------------------------------------------------------------------------------------------------------------------------------------------------------------------------------------------------------------------------------------------------------------------------------------------------------------------------------------------------------------------------------------------------------------------------------------------------------------------------------------------------------------------------------------------------------------------------------------------------|---------------------------------------------------------------------------------------------------------------------------------------------------------------------------------------------------------------------------------------------------------------------|----------------------------------------------------------------------------------------------------------------------------------------------------------------------------------------------------------------------------------------------------------------------------------------------------------------------------------------------------------------------------------------------------------------------------------------------------------------------------------------------------------------------------------------------------------------------|----------------------------------------------------------------------------|----------------------------------------------------------------------------------------------------------------------|

|                                                   |                                                                                                                                                                                                                                                                                                                                                                                                                                                                                                                                                                                                                                                                                                                                                          |                                                                                                                                                              |                                                                                                                                                                                                                                                                                                       |                                                              |                                                                                                                      |
|---------------------------------------------------|----------------------------------------------------------------------------------------------------------------------------------------------------------------------------------------------------------------------------------------------------------------------------------------------------------------------------------------------------------------------------------------------------------------------------------------------------------------------------------------------------------------------------------------------------------------------------------------------------------------------------------------------------------------------------------------------------------------------------------------------------------|--------------------------------------------------------------------------------------------------------------------------------------------------------------|-------------------------------------------------------------------------------------------------------------------------------------------------------------------------------------------------------------------------------------------------------------------------------------------------------|--------------------------------------------------------------|----------------------------------------------------------------------------------------------------------------------|
|                                                   | testing session; MRI compatibility                                                                                                                                                                                                                                                                                                                                                                                                                                                                                                                                                                                                                                                                                                                       |                                                                                                                                                              |                                                                                                                                                                                                                                                                                                       |                                                              |                                                                                                                      |
| Patterson et al. <sup>31</sup><br>2020<br>Finland | <p><b>Study design:</b> RCT</p> <p><b>Dates of recruitment:</b><br/>Apr 2018 – Oct 2018</p> <p><b>Inclusion Criteria:</b> if they gave voluntary, written informed consent to participate in the study, were either male or female aged between 18-45 years (inclusive), had a body mass index (BMI) between 18.5 – 29.9 kg/m<sup>2</sup>, a medical examination at Visit 2 indicated they were healthy (in the opinion of the Principal Investigator (PI)), had the ability to comprehend the full nature and purpose of the study including possible risks and side effects, agreed to comply with the protocol and study restrictions, were available for all study visits, had easy access to the internet and females provided a negative urine</p> | <p><b>Intervention:</b><br/>n=55 (females: NR)<br/><br/>Age: 23.73 (4.27)</p> <hr/> <p><b>Control:</b><br/>n= 58 (females: NR)<br/><br/>Age: 23.25 (4.2)</p> | <p><b>Type:</b> <i>Lacticaseibacillus paracasei</i> Lpc-37</p> <p><b>Probiotic Dosage:</b><br/>1.75 x 10<sup>10</sup> CFU/day</p> <p><b>Additional supplement:</b> None</p> <p><b>Probiotic Duration:</b><br/>5 weeks</p> <p><b>Comparator:</b> Placebo</p> <p><b>Additional supplement:</b> None</p> | <ul style="list-style-type: none"> <li>• DASS42-D</li> </ul> | <ul style="list-style-type: none"> <li>• No statistically significant effect due to treatment identified.</li> </ul> |

|  |                                                                                                                                                                                                                                                                                                                                                                                                                                                                                                                                                                                                                                                                                                                                                                                                                                                                                                                                                                                                                                                                |  |  |  |  |
|--|----------------------------------------------------------------------------------------------------------------------------------------------------------------------------------------------------------------------------------------------------------------------------------------------------------------------------------------------------------------------------------------------------------------------------------------------------------------------------------------------------------------------------------------------------------------------------------------------------------------------------------------------------------------------------------------------------------------------------------------------------------------------------------------------------------------------------------------------------------------------------------------------------------------------------------------------------------------------------------------------------------------------------------------------------------------|--|--|--|--|
|  | <p>pregnancy test and were using effective contraception.</p> <p><b>Exclusion Criteria:</b> diagnosed with one or more DSM-IV axis 1 disorder, had a significant acute or chronic coexisting illness, were currently taking (from Visit 1 onwards) or previously took (last four weeks prior to Visit 1) psychoactive medication(s), were currently taking (from Visit 1 onwards) medication or dietary supplements that would interfere with the objectives of the study (in the opinion of PI), were undergoing recent (last four weeks prior to Visit 1) or ongoing antibiotic therapy, consumed daily concentrated sources or probiotics / prebiotics within two weeks of Visit 1 or ongoing, were females either pregnant or lactating or had pregnancy planned during the intervention period, were not fluent in the German language, had self-reported dyslexia, previously had a history of alcohol, medication or drug abuse, were self-declared illicit drug users for three weeks prior to Visit 1 and during the intervention period, had any</p> |  |  |  |  |
|--|----------------------------------------------------------------------------------------------------------------------------------------------------------------------------------------------------------------------------------------------------------------------------------------------------------------------------------------------------------------------------------------------------------------------------------------------------------------------------------------------------------------------------------------------------------------------------------------------------------------------------------------------------------------------------------------------------------------------------------------------------------------------------------------------------------------------------------------------------------------------------------------------------------------------------------------------------------------------------------------------------------------------------------------------------------------|--|--|--|--|

|                                                              |                                                                                                                                                                                                                                                                                                                                                                                                                                                                                                                                                               |                                                                                                                                                                                     |                                                                                                                                                                                                                                                                                             |                                                            |                                                                                                                      |
|--------------------------------------------------------------|---------------------------------------------------------------------------------------------------------------------------------------------------------------------------------------------------------------------------------------------------------------------------------------------------------------------------------------------------------------------------------------------------------------------------------------------------------------------------------------------------------------------------------------------------------------|-------------------------------------------------------------------------------------------------------------------------------------------------------------------------------------|---------------------------------------------------------------------------------------------------------------------------------------------------------------------------------------------------------------------------------------------------------------------------------------------|------------------------------------------------------------|----------------------------------------------------------------------------------------------------------------------|
|                                                              | <p>contraindication to any substance in the investigational products, were hypertensive, had unstable or uncontrolled hyper- or hypothyroidism, previously participated in the Trier Social Stress Test (TSST), smoked &gt; five cigarettes per day, were an employee of either DuPont Nutrition &amp; Biosciences or daacro, participated in another study with any investigational product within 60 days of Visit 1 and during the intervention period, were uncooperative and/or noncompliant (in the opinion of PI) or were under legal supervision.</p> |                                                                                                                                                                                     |                                                                                                                                                                                                                                                                                             |                                                            |                                                                                                                      |
| <p>Pinto-Sanchez et al.<sup>32</sup><br/>2017<br/>Canada</p> | <p><b>Study design:</b> RCT</p> <p><b>Dates of recruitment:</b><br/>Mar 2011 – May 2014</p> <p><b>Inclusion Criteria:</b> Aged 21-65 with a diagnosis of irritable bowel syndrome with diarrhea or mixed=stool pattern (Rome III criteria) and mild to moderate anxiety and/or depression scores based on the Hospital Anxiety and Depression (HAD) scale (HAD-A or HAD-D score 8 – 14)</p>                                                                                                                                                                   | <p><b>Intervention:</b><br/>n=18 (females: 12)</p> <p>Median age (IQR): 46.5 (30-58)</p> <hr/> <p><b>Control:</b><br/>n= 20 (females: 12)</p> <p>Median age (IQR): 40.0 (26-57)</p> | <p><b>Type:</b> <i>Bifidobacterium longum</i></p> <p><b>Probiotic Dosage:</b><br/>1 x 10<sup>10</sup> CFU/day</p> <p><b>Additional supplement:</b> None</p> <hr/> <p><b>Probiotic Duration:</b><br/>6 weeks</p> <p><b>Comparator:</b> Placebo</p> <p><b>Additional supplement:</b> None</p> | <ul style="list-style-type: none"> <li>• HADS-D</li> </ul> | <ul style="list-style-type: none"> <li>• No statistically significant effect due to treatment identified.</li> </ul> |

|                                                  |                                                                                                                                                                                                                                                                                                                                                                                                                                                                                    |                                                                                                                                                                                  |                                                                                                                                                                                                                                                                                       |                                                         |                                                                                                          |
|--------------------------------------------------|------------------------------------------------------------------------------------------------------------------------------------------------------------------------------------------------------------------------------------------------------------------------------------------------------------------------------------------------------------------------------------------------------------------------------------------------------------------------------------|----------------------------------------------------------------------------------------------------------------------------------------------------------------------------------|---------------------------------------------------------------------------------------------------------------------------------------------------------------------------------------------------------------------------------------------------------------------------------------|---------------------------------------------------------|----------------------------------------------------------------------------------------------------------|
|                                                  | <p><b>Exclusion Criteria:</b> History of organic diseases, immune deficiency, major abdominal surgery, psychiatric condition other than anxiety or depression, use of immunosuppressants, glucocorticosteroids, opioids, antidepressants or anxiolytics in regular doses, alcohol or illicit drug consumption, consumption of antibiotics 3 months prior to the run-in period and the trial, probiotics in any form were forbidden during the 1 month run in period and trial.</p> |                                                                                                                                                                                  |                                                                                                                                                                                                                                                                                       |                                                         |                                                                                                          |
| <p>Qi et al.<sup>33</sup><br/>2020<br/>China</p> | <p><b>Study design:</b> RCT</p> <p><b>Dates of recruitment:</b><br/>Jan 2017 – Dec 2018</p> <p><b>Inclusion Criteria:</b> Patients attending audio-vestibular testing, between 18 and 50 years old, providing written informed consent, and have sufficient cognitive abilities as well as language proficiency to complete the assessments and questionnaires. 1) migraine based on the International Classification of Headache Disorders 3rd edition (IHS,</p>                  | <p><b>Intervention:</b><br/>n=103 (females: 89)</p> <p>Mean age (range): 32 (18-50)</p> <hr/> <p><b>Control:</b><br/>n=101 (females: 85)</p> <p>Mean age (range): 33 (19-49)</p> | <p><b>Type:</b> <i>Lactobacillus casei</i> Shirota</p> <p><b>Probiotic Dosage:</b><br/>2×10<sup>10</sup> CFU/day</p> <p><b>Additional supplement:</b> None</p> <p><b>Probiotic Duration:</b> 4 months</p> <p><b>Comparator:</b> Placebo</p> <p><b>Additional supplement:</b> None</p> | <ul style="list-style-type: none"> <li>• BDI</li> </ul> | <ul style="list-style-type: none"> <li>• Significant improvement due to intervention (p=0.04)</li> </ul> |



|                                                                                                                                                                                                                                                                                                                                                                                                                                                                                                                                                                                                                                                                                                                                                                                                                                                                                                                                                                                                               |  |  |  |  |
|---------------------------------------------------------------------------------------------------------------------------------------------------------------------------------------------------------------------------------------------------------------------------------------------------------------------------------------------------------------------------------------------------------------------------------------------------------------------------------------------------------------------------------------------------------------------------------------------------------------------------------------------------------------------------------------------------------------------------------------------------------------------------------------------------------------------------------------------------------------------------------------------------------------------------------------------------------------------------------------------------------------|--|--|--|--|
| <p>2018); (2) five or more episodes of moderate to severe vestibular symptoms lasting between 5 min and 72 h (spontaneous vertigo, positional vertigo, visually-induced vertigo, head motion-induced vertigo and head motion-induced dizziness with nausea); (3) half of episodes are associated with at least one of the three migrainous features: (a) headache with at least two of the following four characteristics including unilateral location, pulsating quality, moderate or severe intensity and aggravation by routine physical activity, (b) photophobia and phonophobia and (c) visual aura; (4) alternative causative factors ruled out through appropriate assessments.</p> <p><b>Exclusion Criteria:</b> (1) bilateral vestibular dysfunction; (2) report of mere spontaneous episodic dizziness that was not provoked/worsened by movements; (3) past histories of moderate neurological or orthopaedic deficits; (4) use of probiotics supplement within 2 months prior to this study</p> |  |  |  |  |
|---------------------------------------------------------------------------------------------------------------------------------------------------------------------------------------------------------------------------------------------------------------------------------------------------------------------------------------------------------------------------------------------------------------------------------------------------------------------------------------------------------------------------------------------------------------------------------------------------------------------------------------------------------------------------------------------------------------------------------------------------------------------------------------------------------------------------------------------------------------------------------------------------------------------------------------------------------------------------------------------------------------|--|--|--|--|

|                                                       |                                                                                                                                                                                                                                                                                                                                                                                                                                                                                                                                                                                                                                                                                                                                                                                                                                                                                                                                                                                                      |                                                                                                                                                                           |                                                                                                                                                                                                                                                                                                                                                                                                                                                                                                                                                                                                                                                                                                                                                                                    |                                                           |                                                                                                                     |
|-------------------------------------------------------|------------------------------------------------------------------------------------------------------------------------------------------------------------------------------------------------------------------------------------------------------------------------------------------------------------------------------------------------------------------------------------------------------------------------------------------------------------------------------------------------------------------------------------------------------------------------------------------------------------------------------------------------------------------------------------------------------------------------------------------------------------------------------------------------------------------------------------------------------------------------------------------------------------------------------------------------------------------------------------------------------|---------------------------------------------------------------------------------------------------------------------------------------------------------------------------|------------------------------------------------------------------------------------------------------------------------------------------------------------------------------------------------------------------------------------------------------------------------------------------------------------------------------------------------------------------------------------------------------------------------------------------------------------------------------------------------------------------------------------------------------------------------------------------------------------------------------------------------------------------------------------------------------------------------------------------------------------------------------------|-----------------------------------------------------------|---------------------------------------------------------------------------------------------------------------------|
| <p>Rahimlou et al.<sup>34</sup><br/>2020<br/>Iran</p> | <p><b>Study design:</b> RCT</p> <p><b>Dates of recruitment:</b><br/>Oct 2018 – June 2019</p> <p><b>Inclusion Criteria:</b> relapsing-remitting multiple sclerosis according to the original or 2005 revised McDonald criteria, EDSS score of <math>\leq 4.5</math>, and confirmed by MRI; age 18-50.</p> <p><b>Exclusion Criteria:</b> Unwillingness to participate, acute or severe phase of multiple sclerosis, pregnancy, taking antibiotics, any product or supplement containing probiotics, anti-inflammatory drugs over the past 1 month, taking oral or systemic glucocorticoids or adrenocorticotrophic hormone, omega 3 or other antioxidant supplements within 30 days prior to inclusion, a history or presence of severe depression and arthrosis, suicide attempt or current suicidal ideation, history of gastroenteritis and bowel surgery over the past month, inflammatory bowel disease, rheumatoid arthritis, systemic lupus, type 1 diabetes and other autoimmune diseases;</p> | <p><b>Intervention:</b><br/>n=32 (females: 26)</p> <p>Mean age (SD): 42.2 (12.0)</p> <hr/> <p><b>Control:</b><br/>n=33 (females: 21)</p> <p>Mean age (SD): 39.9 (8.8)</p> | <p><b>Type:</b> <i>Bacillus subtilis</i> PXN 21, <i>Bifidobacterium bifidum</i> PCN 23, <i>Bifidobacterium breve</i> PXN 25, <i>Bifidobacterium infantis</i> PXN 27, <i>Bifidobacterium longum</i> PXN 30, <i>Lactobacillus acidophilus</i> PXN 35, <i>L. delbrueckii</i> ssp. <i>Bulgaricus</i> PXN 39, <i>L. casei</i> PXN 37, <i>L. plantarum</i> PXN 47, <i>L. rhamnosus</i> PXN 54, <i>L. helveticus</i> PXN 45, <i>L. salivarius</i> PXN 57, <i>Lactococcus lactis</i> ssp. <i>Lactis</i> PXN 63, <i>Streptococcus thermophilus</i> PXN 66</p> <p><b>Probiotic Dosage:</b><br/>4×10<sup>9</sup> CFU/day</p> <p><b>Additional supplement:</b> None</p> <p><b>Probiotic Duration:</b> 6 months</p> <p><b>Comparator:</b> Placebo</p> <p><b>Additional supplement:</b> None</p> | <ul style="list-style-type: none"> <li>• BDI-2</li> </ul> | <ul style="list-style-type: none"> <li>• Significant improvement reported due to intervention (p=0.049).</li> </ul> |
|-------------------------------------------------------|------------------------------------------------------------------------------------------------------------------------------------------------------------------------------------------------------------------------------------------------------------------------------------------------------------------------------------------------------------------------------------------------------------------------------------------------------------------------------------------------------------------------------------------------------------------------------------------------------------------------------------------------------------------------------------------------------------------------------------------------------------------------------------------------------------------------------------------------------------------------------------------------------------------------------------------------------------------------------------------------------|---------------------------------------------------------------------------------------------------------------------------------------------------------------------------|------------------------------------------------------------------------------------------------------------------------------------------------------------------------------------------------------------------------------------------------------------------------------------------------------------------------------------------------------------------------------------------------------------------------------------------------------------------------------------------------------------------------------------------------------------------------------------------------------------------------------------------------------------------------------------------------------------------------------------------------------------------------------------|-----------------------------------------------------------|---------------------------------------------------------------------------------------------------------------------|

|                                             |                                                                                                                                                                                                                                                                                                                                                                                  |                                                                                                                                                                            |                                                                                                                                                                                                                                                                                                                                                                                                                                            |                                                         |                                                                                                                                                                                         |
|---------------------------------------------|----------------------------------------------------------------------------------------------------------------------------------------------------------------------------------------------------------------------------------------------------------------------------------------------------------------------------------------------------------------------------------|----------------------------------------------------------------------------------------------------------------------------------------------------------------------------|--------------------------------------------------------------------------------------------------------------------------------------------------------------------------------------------------------------------------------------------------------------------------------------------------------------------------------------------------------------------------------------------------------------------------------------------|---------------------------------------------------------|-----------------------------------------------------------------------------------------------------------------------------------------------------------------------------------------|
|                                             | treatment with interferon in the past month and with other medications in the previous three months.                                                                                                                                                                                                                                                                             |                                                                                                                                                                            |                                                                                                                                                                                                                                                                                                                                                                                                                                            |                                                         |                                                                                                                                                                                         |
| Raygan et al. <sup>35</sup><br>2018<br>Iran | <p><b>Study design:</b> RCT</p> <p><b>Dates of recruitment:</b><br/>Aug 2017 - Nov 2017</p> <p><b>Inclusion Criteria:</b> 45-85 years old, diagnosed with type 2 diabetes and coronary heart disease with 2 and 3-vessel CHD</p> <p><b>Exclusion Criteria:</b> Consuming vitamin D, probiotic and/or symbiotic within the last 3 months, and patients with thyroid disorders</p> | <p><b>Intervention:</b><br/>n=30 (females: 14)</p> <p>Mean age (SD): 71.5 (10.9)</p> <hr/> <p><b>Control:</b><br/>n=30 (females: 16)</p> <p>Mean age (SD): 67.3 (11.0)</p> | <p><b>Type:</b> <i>Lactobacillus acidophilus</i>, <i>Bifidobacterium bifidum</i>, <i>L. reuteri</i>, and <i>L. fermentum</i></p> <p><b>Probiotic Dosage:</b><br/>8×10<sup>9</sup> CFU/g (each organism 2 x 10<sup>9</sup> CFU/ day)</p> <p><b>Additional supplement:</b><br/>50,000 IU vitamin D3 every 2 weeks</p> <p><b>Probiotic Duration:</b> 12 weeks</p> <p><b>Comparator:</b> Placebo</p> <p><b>Additional supplement:</b> None</p> | <ul style="list-style-type: none"> <li>• BDI</li> </ul> | <ul style="list-style-type: none"> <li>• Significant improvement in BDI score in intervention compared to control: (intervention: -2.8 ± 3.8, control: -0.9 ± 2.1, p = 0.01)</li> </ul> |
| Raygan et al. <sup>36</sup><br>2019<br>Iran | <p><b>Study design:</b> RCT</p> <p><b>Dates of recruitment:</b><br/>Dec 2017 – Mar 2018</p> <p><b>Inclusion Criteria:</b> Patients aged 45-85 years old diagnosed with both type 2 diabetes and chronic heart disease as diagnosed by</p>                                                                                                                                        | <p><b>Intervention:</b><br/>n= 27 (females:16)</p> <p>Mean age (SD): 64.8 ± 8.3</p> <hr/> <p><b>Control:</b><br/>n=27 (females: 17)</p>                                    | <p><b>Type:</b> <i>Lactobacillus acidophilus</i>, <i>L. reuteri</i>, <i>L. fermentum</i> and <i>Bifidobacterium bifidum</i></p> <p><b>Probiotic Dosage:</b><br/>8×10<sup>9</sup> CFU/g (each organism 2 x 10<sup>9</sup> CFU/ day)</p> <p><b>Additional supplement:</b></p>                                                                                                                                                                | <ul style="list-style-type: none"> <li>• BDI</li> </ul> | <ul style="list-style-type: none"> <li>• Probiotic and selenium co-supplementation significantly improved BDI score in intervention compared to control</li> </ul>                      |

|                                             |                                                                                                                                                                                                                                                                                                                                                                                                                                                  |                                                                                                                                                                          |                                                                                                                                                                                                                                                                                                                                                                                                       |                                                         |                                                                                                                      |
|---------------------------------------------|--------------------------------------------------------------------------------------------------------------------------------------------------------------------------------------------------------------------------------------------------------------------------------------------------------------------------------------------------------------------------------------------------------------------------------------------------|--------------------------------------------------------------------------------------------------------------------------------------------------------------------------|-------------------------------------------------------------------------------------------------------------------------------------------------------------------------------------------------------------------------------------------------------------------------------------------------------------------------------------------------------------------------------------------------------|---------------------------------------------------------|----------------------------------------------------------------------------------------------------------------------|
|                                             | <p>the American Diabetes Association and American Heart Association criteria.</p> <p><b>Exclusion Criteria:</b> Participants reported selenium, probiotic and/or symbiotic consumption within the last 3 months, patients with thyroid disorders, severe renal insufficiency and hepatic failure, and those experiencing an acute myocardial infarction and cardiac surgery within the past 3 months were excluded.</p>                          | <p>Mean age (SD): 62.4 (13.1)</p>                                                                                                                                        | <p>200 µg/day Selenium</p> <p><b>Probiotic Duration:</b> 12 weeks</p> <p><b>Comparator:</b> Placebo</p> <p><b>Additional supplement:</b> None</p>                                                                                                                                                                                                                                                     |                                                         |                                                                                                                      |
| Roman et al. <sup>37</sup><br>2018<br>Spain | <p><b>Study design:</b> RCT</p> <p><b>Dates of recruitment:</b><br/>Dec 2015 - Feb 2016</p> <p><b>Inclusion Criteria:</b> Diagnosed with Fibromyalgia at least 1 year prior to study</p> <p><b>Exclusion Criteria:</b> taking antibiotics and nutritional supplements, allergies, currently participating in other studies, pregnant or breastfeeding, severe intestinal disease, psychiatric disorder other than depression and/ or anxiety</p> | <p><b>Intervention:</b><br/>n=16 (females: 15)</p> <p>Mean age (SD): 55 (2.09)</p> <hr/> <p><b>Control:</b><br/>n=15 (females: 13)</p> <p>Mean age (SD): 50.3 (2.03)</p> | <p><b>Type:</b> <i>Lactobacillus Rhamnosus GG</i><sup>®</sup>, <i>L. casei</i>, <i>L. acidophilus</i>, and <i>Bifidobacterium bifidus</i></p> <p><b>Probiotic Dosage:</b> 6 million revivification of germs per capsule (4 / day)</p> <p><b>Additional supplement:</b> None</p> <p><b>Probiotic Duration:</b> 8 weeks</p> <p><b>Comparator:</b> Placebo</p> <p><b>Additional supplement:</b> None</p> | <ul style="list-style-type: none"> <li>• BDI</li> </ul> | <ul style="list-style-type: none"> <li>• No statistically significant effect due to treatment identified.</li> </ul> |
| Romijn et al. <sup>38</sup>                 | <b>Study design:</b> RCT                                                                                                                                                                                                                                                                                                                                                                                                                         | <b>Intervention:</b>                                                                                                                                                     |                                                                                                                                                                                                                                                                                                                                                                                                       |                                                         |                                                                                                                      |

|                                                       |                                                                                                                                                                                                                                                                                                                                                                                                                                                                                                                                                                                                                                                                                                                                                                                                                                              |                                                                                      |                                                                                                                                                    |                                                                                               |                                                                                                                      |
|-------------------------------------------------------|----------------------------------------------------------------------------------------------------------------------------------------------------------------------------------------------------------------------------------------------------------------------------------------------------------------------------------------------------------------------------------------------------------------------------------------------------------------------------------------------------------------------------------------------------------------------------------------------------------------------------------------------------------------------------------------------------------------------------------------------------------------------------------------------------------------------------------------------|--------------------------------------------------------------------------------------|----------------------------------------------------------------------------------------------------------------------------------------------------|-----------------------------------------------------------------------------------------------|----------------------------------------------------------------------------------------------------------------------|
| <p>2017<br/>New Zealand</p>                           | <p><b>Dates of recruitment:</b><br/>May 2013 – May 2014</p> <p><b>Inclusion Criteria:</b> either <math>\geq 11</math> on the Quick Inventory of Depressive Symptomatology (QIDS) or <math>\geq 14</math> on the depression subscale of the Depression, Anxiety and Stress Scale (DASS-42); aged 16+ at the time of screening; free of any psychiatric medication for at least 4 weeks prior to the trial</p> <p><b>Exclusion Criteria:</b> any neurological disorder; renal, hepatic, cardiovascular or respiratory disease; any serious medical condition with major medical interventions anticipated during the trial; pregnancy or breastfeeding; use of any supplement considered potentially antidepressant (e.g. St John's Wort, 5-HTP, SAME); serious risk of suicide or violence; current or recent probiotic or antibiotic use</p> | <p>n=40 (female: 32)</p> <p>Mean age (SD): 35.8 (14)</p>                             | <p><b>Type:</b> <i>Lactobacillus helveticus</i> R0052 (strain I-1722) and <i>Bifidobacterium longum</i> R0175 (CNCM strain I-3470)</p>             | <ul style="list-style-type: none"> <li>• MADRS</li> <li>• DASS42-D</li> <li>• QIDS</li> </ul> | <ul style="list-style-type: none"> <li>• No statistically significant effect due to treatment identified.</li> </ul> |
| <p>Rudzki et al.<sup>39</sup><br/>2019<br/>Poland</p> | <p><b>Study design:</b> RCT</p> <p><b>Dates of recruitment:</b><br/>June 2014 – March 2016</p>                                                                                                                                                                                                                                                                                                                                                                                                                                                                                                                                                                                                                                                                                                                                               | <p><b>Intervention:</b><br/>n=30 (female: 23)</p> <p>Mean age (SD): 39.13 (9.96)</p> | <p><b>Type:</b> <i>Lactobacillus plantarum</i> (strain 299v)</p> <p><b>Probiotic Dosage:</b> <math>10 \times 10^9</math> CFU/capsule twice/day</p> | <ul style="list-style-type: none"> <li>• HAM-D</li> </ul>                                     | <ul style="list-style-type: none"> <li>• No statistically significant effect due to treatment identified.</li> </ul> |

|  |                                                                                                                                                                                                                                                                                                                                                                                                                                                                                                                                                                                        |                                                                                                                                                                 |  |  |  |
|--|----------------------------------------------------------------------------------------------------------------------------------------------------------------------------------------------------------------------------------------------------------------------------------------------------------------------------------------------------------------------------------------------------------------------------------------------------------------------------------------------------------------------------------------------------------------------------------------|-----------------------------------------------------------------------------------------------------------------------------------------------------------------|--|--|--|
|  | <p><b>Inclusion Criteria:</b> SSRI monotherapy or drug-free at admission; DSM-IV MDD diagnosis</p> <p><b>Exclusion Criteria:</b> inflammatory, oncological, and autoimmune disorders; diabetes; previous diagnosis of other psychiatric diseases other than depression; psychoactive substances abuse; organic brain dysfunctions; smoking; patients with changes in routine blood biochemical parameters; pregnancy, lactation, BMI&lt;18.5 kg/m<sup>2</sup> and &gt;30 kg/m<sup>2</sup>, treatment with antipsychotic drugs, mood stabilizers, antibiotics, glucocorticosteroids</p> |                                                                                                                                                                 |  |  |  |
|  | <p><b>Control:</b><br/>n=30 (female: 20)<br/><br/>Mean age (SD): 38.9 (12)</p>                                                                                                                                                                                                                                                                                                                                                                                                                                                                                                         | <p><b>Additional supplement:</b> SSRI</p> <p><b>Probiotic Duration:</b> 8 weeks</p> <p><b>Comparator:</b> Placebo</p> <p><b>Additional supplement:</b> None</p> |  |  |  |

|                                                          |                                                                                                                                                                                                                                                                                                                                                                                                                                                                                                                                                                                                                                                                                                                                                                                                                                                     |                                                                                      |                                                                                                                                                                                                                                                                                                   |                                                              |                                                                                                                     |
|----------------------------------------------------------|-----------------------------------------------------------------------------------------------------------------------------------------------------------------------------------------------------------------------------------------------------------------------------------------------------------------------------------------------------------------------------------------------------------------------------------------------------------------------------------------------------------------------------------------------------------------------------------------------------------------------------------------------------------------------------------------------------------------------------------------------------------------------------------------------------------------------------------------------------|--------------------------------------------------------------------------------------|---------------------------------------------------------------------------------------------------------------------------------------------------------------------------------------------------------------------------------------------------------------------------------------------------|--------------------------------------------------------------|---------------------------------------------------------------------------------------------------------------------|
| <p>Saccarello et al.<sup>40</sup><br/>2020<br/>Italy</p> | <p><b>Study design:</b> RCT</p> <p><b>Dates of recruitment:</b><br/>Sept 2018 – Oct 2018</p> <p><b>Inclusion Criteria:</b> men and women aged 18-60 years with signed and dated written informed consent; diagnosis of recurrent mild-to-moderate depressive disorders according to ICD-10/F33 criteria; Z-SDS raw score between 41 and 55; and ability to comply with the requirements of the entire study</p> <p><b>Exclusion Criteria:</b> Pregnant or breast-feeding women, presence of ≥ 1 psychiatric disturbances (alcoholism, substance abuse, or dependency disorder; bipolar disorder; schizophrenia; or other personality disorder), treatment with psychotropic drugs (antipsychotics, anxiolytics, hypnotics, or sedatives), or oral consumption of food supplements (only multivitamins, salts, and trace elements were accepted)</p> | <p><b>Intervention:</b><br/>n=45 (females: 38)</p> <p>Mean age (SD): 48.6 (10.7)</p> | <p><b>Type:</b> <i>Lactobacillus plantarum</i></p> <p><b>Probiotic Dosage:</b> 1×10<sup>9</sup> CFU/day</p> <p><b>Additional supplement:</b> S-adenosylmethionine 200mg</p> <p><b>Probiotic Duration:</b> 6 weeks</p> <p><b>Comparator:</b> Placebo</p> <p><b>Additional supplement:</b> None</p> | <ul style="list-style-type: none"> <li>• Zung SDS</li> </ul> | <ul style="list-style-type: none"> <li>• Significant improvement reported due to intervention (p=0.0165)</li> </ul> |
| <p>Salami et al.<sup>41</sup><br/>2019<br/>Iran</p>      | <p><b>Study design:</b> RCT</p> <p><b>Dates of recruitment:</b></p>                                                                                                                                                                                                                                                                                                                                                                                                                                                                                                                                                                                                                                                                                                                                                                                 | <p><b>Intervention:</b><br/>n=24 (females: 18)</p>                                   | <p><b>Type:</b> <i>Bifidobacterium infantis</i>, <i>B. lactis</i>, <i>Lactobacillus reuteri</i>,</p>                                                                                                                                                                                              | <ul style="list-style-type: none"> <li>• BDI</li> </ul>      | <ul style="list-style-type: none"> <li>• Significant improvement in intervention group</li> </ul>                   |

|                                                        |                                                                                                                                                                                                                                                                                                                                                                                                                                                                       |                                                                                                                                                                  |                                                                                                                                                                                                                                                                                                                                        |                                                         |                                                                                                                        |
|--------------------------------------------------------|-----------------------------------------------------------------------------------------------------------------------------------------------------------------------------------------------------------------------------------------------------------------------------------------------------------------------------------------------------------------------------------------------------------------------------------------------------------------------|------------------------------------------------------------------------------------------------------------------------------------------------------------------|----------------------------------------------------------------------------------------------------------------------------------------------------------------------------------------------------------------------------------------------------------------------------------------------------------------------------------------|---------------------------------------------------------|------------------------------------------------------------------------------------------------------------------------|
|                                                        | <p>Sept 2017 – Jan 2018</p> <p><b>Inclusion Criteria:</b> 20 - 60 years old, course of disease relapsing-remitting Multiple Sclerosis (RRMS)</p> <p><b>Exclusion Criteria:</b> Primary progressive MS (PPMS); secondary progressing MS; clinical relapse and glucocorticoid therapy during past month; pregnant or lactating; patients with bearing nephrolithiasis within prior five years; and consumption of probiotics or symbiotic during past three months.</p> | <p>Mean age (SD): 34.79 (1.06)</p> <hr/> <p><b>Control:</b><br/>n=24 (females: 18)</p> <p>Mean age (SD): 36.54 (1.44)</p>                                        | <p><i>L. casei</i>, <i>L. plantarum</i> and <i>L. fermentum</i></p> <p><b>Probiotic Dosage:</b> 2x10<sup>9</sup> CFU each capsule/ day</p> <p><b>Additional supplement:</b> None</p> <p><b>Probiotic Duration:</b> 16 weeks</p> <p><b>Comparator:</b> Placebo</p> <p><b>Additional supplement:</b> None</p>                            |                                                         | <p>compared to control (p =0.026)</p>                                                                                  |
| <p>Sanchez et al.<sup>42</sup><br/>2017<br/>Canada</p> | <p><b>Study design:</b> RCT</p> <p><b>Dates of recruitment:</b> NR</p> <p><b>Inclusion Criteria:</b> men and women between 18 and 55 years of age; absence of pregnancy, breastfeeding, or menopause (determined by the cessation of menstruation); stable body weight (body weight change &lt;5 kg for three months before screening); BMI between 29 and 41 kg/m<sup>2</sup>, without associated co-morbidities</p>                                                 | <p><b>Intervention:</b><br/>n=62 (female: 38)</p> <p>Mean age (SD): 35 (10)</p> <hr/> <p><b>Control:</b><br/>n=63 (female: 39)</p> <p>Mean age (SD): 37 (10)</p> | <p><b>Type:</b> <i>Lactobacillus rhamnosus</i> CGMCC1.3724 (LPR)</p> <p><b>Synbiotic Dosage:</b> 1.62 10<sup>8</sup> CFU per capsule/twice a day + 300 mg of a mix of oligofructose and inulin (70/30; v/v)</p> <p><b>Synbiotic Duration:</b> 24 weeks</p> <p><b>Comparator:</b> Placebo</p> <p><b>Additional supplement:</b> None</p> | <ul style="list-style-type: none"> <li>• BDI</li> </ul> | <ul style="list-style-type: none"> <li>• Synbiotic offered a significant decrease in BDI score (p&lt;0.05).</li> </ul> |



|                                              |                                                                                                                                                                                                                                                                                                                                                                                                                                         |                                                                                                                                                                             |                                                                                                                                                                                                                                                                                                                                                                                   |                                                                                |                                                                                                                      |
|----------------------------------------------|-----------------------------------------------------------------------------------------------------------------------------------------------------------------------------------------------------------------------------------------------------------------------------------------------------------------------------------------------------------------------------------------------------------------------------------------|-----------------------------------------------------------------------------------------------------------------------------------------------------------------------------|-----------------------------------------------------------------------------------------------------------------------------------------------------------------------------------------------------------------------------------------------------------------------------------------------------------------------------------------------------------------------------------|--------------------------------------------------------------------------------|----------------------------------------------------------------------------------------------------------------------|
|                                              | <b>Exclusion Criteria:</b> NR                                                                                                                                                                                                                                                                                                                                                                                                           |                                                                                                                                                                             |                                                                                                                                                                                                                                                                                                                                                                                   |                                                                                |                                                                                                                      |
| Sawada et al. <sup>43</sup><br>2017<br>Japan | <p><b>Study design:</b> RCT - Crossover</p> <p><b>Dates of recruitment:</b><br/>Sept to Dec; year NR</p> <p><b>Inclusion Criteria:</b> male students; not habitual smokers; no mental or other diseases or allergies to milk or other foods; taking the cadaver dissection course</p> <p><b>Exclusion Criteria:</b> had taken medication for 3 months prior to enrolment</p>                                                            | <p><b>Intervention:</b><br/>n=24 (female: 0)<br/><br/>Mean age (SD): NR</p> <hr/> <p><b>Control:</b><br/>n=24 (female: 0)<br/><br/>Mean age (SD): NR</p>                    | <p><b>Type:</b> <i>Lactobacillus gasseri</i> CP2305 cultured in medium containing 10% skim milk and 0.25% yeast extract</p> <p><b>Probiotic Dosage:</b> 1.0x10<sup>10</sup> CFU/pouch (2.5g)/day</p> <p><b>Additional supplement:</b> No</p> <p><b>Probiotic Duration:</b> 4 weeks</p> <p><b>Comparator:</b> Placebo</p> <p><b>Additional supplement:</b> None</p>                | <ul style="list-style-type: none"> <li>• HADS-D</li> <li>• Zung-SDS</li> </ul> | <ul style="list-style-type: none"> <li>• No statistically significant effect due to treatment identified.</li> </ul> |
| Sawada et al. <sup>44</sup><br>2019<br>Japan | <p><b>Study design:</b> RCT</p> <p><b>Dates of recruitment:</b><br/>Sept 2016 – Dec 2016</p> <p><b>Inclusion Criteria:</b> 18-22 years of age, male, healthy university students members of the long-distance relay race team</p> <p><b>Exclusion Criteria:</b> history of psychiatric or somatic diseases in the past and present; taking medication at least for three months prior to the enrollment and during the experimental</p> | <p><b>Intervention:</b><br/>n=24 (females: 0 )<br/><br/>Mean age (SD): 19.8 (1.4)</p> <hr/> <p><b>Control:</b><br/>n=25 (females: 0)<br/><br/>Mean age (SD): 20.1 (1.1)</p> | <p><b>Type:</b> <i>Lactobacillus gasseri</i> CP2305 (CP2305) mixed in sport drink containing sweetener, acidifier, flavorings, vitamin C, and minerals (Na, Ca, K, Mg)</p> <p><b>Probiotic Dosage:</b> 1 x 10<sup>10</sup> CFU per each 200ml/ day</p> <p><b>Additional supplement:</b><br/>Vitamin C and minerals (Na, Ca, K, Mg)</p> <p><b>Probiotic Duration:</b> 12 weeks</p> | <ul style="list-style-type: none"> <li>• HADS-D</li> </ul>                     | <ul style="list-style-type: none"> <li>• Significant reduction in intervention group compared to control</li> </ul>  |

|                                                     |                                                                                                                                                                                                                                                                                                                                                                                                                                                                                                                                                                                                                                                                                                                                                      |                                                                                                                                                                               |                                                                                                                                                                                                                                                                                                                                                                                                                                                                                                                                                                                                                                                                       |          |                                                                    |
|-----------------------------------------------------|------------------------------------------------------------------------------------------------------------------------------------------------------------------------------------------------------------------------------------------------------------------------------------------------------------------------------------------------------------------------------------------------------------------------------------------------------------------------------------------------------------------------------------------------------------------------------------------------------------------------------------------------------------------------------------------------------------------------------------------------------|-------------------------------------------------------------------------------------------------------------------------------------------------------------------------------|-----------------------------------------------------------------------------------------------------------------------------------------------------------------------------------------------------------------------------------------------------------------------------------------------------------------------------------------------------------------------------------------------------------------------------------------------------------------------------------------------------------------------------------------------------------------------------------------------------------------------------------------------------------------------|----------|--------------------------------------------------------------------|
|                                                     | period; allergic to milk and soybean                                                                                                                                                                                                                                                                                                                                                                                                                                                                                                                                                                                                                                                                                                                 |                                                                                                                                                                               | <b>Comparator:</b> Placebo<br><br><b>Additional supplement:</b> None                                                                                                                                                                                                                                                                                                                                                                                                                                                                                                                                                                                                  |          |                                                                    |
| Shahrbabaki et al. <sup>45</sup><br>2020<br>Iran    | <b>Study design:</b> RCT<br><br><b>Dates of recruitment:</b><br>Oct 2017 – Oct 2018<br><br><b>Inclusion Criteria:</b> diagnosis of type 1 bipolar disorder based on DSM-5 criteria, were age 18-65 years, not consuming any medication or discontinuing it within 2 weeks prior to the study, and not receiving ECT since 4 weeks prior to the study.<br><br><b>Exclusion Criteria:</b> pregnancy and breast feeding, alcohol and drug use, suicide risk, use of probiotics and supplements over a period of 2 months before the start of the study, chronic diseases (cardiovascular, kidney, liver, lung, AIDS and cancer), active infection, schizophrenia, and other psychiatric disorders, and seizure, which were detected by 2 psychiatrists. | <b>Intervention</b><br>n=19 (females: not reported)<br><br>Mean age (SD): 38.9 (9.83)<br><br><b>Control</b><br>n=19 (females: not reported)<br><br>Mean age (SD): 35.0 (8.18) | <b>Type:</b> <i>Bifidobacterium bifidum</i> , <i>B. lactis</i> , <i>B. langum</i> , and <i>Lactobacillus acidophilus</i> )<br><br><b>Probiotic Dosage:</b> 1.8 x 10 <sup>9</sup> CFU per capsule, per day<br><br><b>Additional supplement:</b><br>Lithium oxide, with a maximum dose of 900 mg per day, sodium valproate, with a maximum dose of 1200 mg per day, and, if necessary, risperidone.<br><br><b>Probiotic Duration:</b> 8 weeks<br><br><b>Comparator:</b> Placebo<br><br><b>Additional supplement:</b><br>Lithium oxide, with a maximum dose of 900 mg per day, sodium valproate, with a maximum dose of 1200 mg per day, and, if necessary, risperidone. | • HAM-D  | • No statistically significant effect due to treatment identified. |
| Silk et al. <sup>46</sup><br>2009<br>United Kingdom | <b>Study design:</b> Crossover RCT<br><br><b>Dates of recruitment:</b><br>Jan 2006 - Dec 2006                                                                                                                                                                                                                                                                                                                                                                                                                                                                                                                                                                                                                                                        | <b>Intervention 1:</b><br>n= 16 (females: NR)<br><br>Mean age (range): NR                                                                                                     | <b>Type:</b> Trans-galactooligosaccharide<br><br><b>Prebiotic Dosage:</b> 3.5 g or 7.0 g per each dry powder/ day                                                                                                                                                                                                                                                                                                                                                                                                                                                                                                                                                     | • HADS-D | • No statistically significant effect due to treatment identified. |

|                                                       |                                                                                                                                                                                                                                                                                                                                                                                                                                                                                                                       |                                                                                                                                                                                                                                    |                                                                                                                                                                                                                                                                                                                                                                                                                                                    |                                                            |                                                                                                                      |
|-------------------------------------------------------|-----------------------------------------------------------------------------------------------------------------------------------------------------------------------------------------------------------------------------------------------------------------------------------------------------------------------------------------------------------------------------------------------------------------------------------------------------------------------------------------------------------------------|------------------------------------------------------------------------------------------------------------------------------------------------------------------------------------------------------------------------------------|----------------------------------------------------------------------------------------------------------------------------------------------------------------------------------------------------------------------------------------------------------------------------------------------------------------------------------------------------------------------------------------------------------------------------------------------------|------------------------------------------------------------|----------------------------------------------------------------------------------------------------------------------|
|                                                       | <p><b>Inclusion Criteria:</b> 18-80 years old, diagnosed with IBS; and not organic gastrointestinal disease, including inflammatory bowel disease</p> <p><b>Exclusion Criteria:</b> functional disorder of the upper gastrointestinal tract for which treatment had not been stable for the preceding three months; abnormal haematological and biochemical indices; abnormal findings on barium enema or colonoscopy within previous 5 years; ingestion of pre- or probiotics in the 2 weeks preceding the trial</p> | <p><b>Control 1:</b><br/>n= 16 (females: NR)<br/>Mean age (range): NR</p> <p><b>Intervention 2:</b><br/>n= 14 (females: NR)<br/>Mean age (range): NR</p> <p><b>Control 2:</b><br/>n= 14 (females: NR)<br/>Mean age (range): NR</p> | <p><b>Additional supplement:</b> None</p> <p><b>Prebiotic Duration:</b> 4 weeks</p> <p><b>Comparator:</b> Placebo</p> <p><b>Additional supplement:</b> None</p>                                                                                                                                                                                                                                                                                    |                                                            |                                                                                                                      |
| <p>Simren et al.<sup>47</sup><br/>2010<br/>Sweden</p> | <p><b>Study design:</b> RCT</p> <p><b>Dates of recruitment:</b><br/>Sept 2005 - Oct 2006</p> <p><b>Inclusion Criteria:</b> 18 - 70 years old, diagnosed with IBS; able to understand and willing to comply to the study procedures</p> <p><b>Exclusion Criteria:</b> Participation in another clinical study one month prior to screening visit and through the study; abnormal results on the screening laboratory test clinical</p>                                                                                 | <p><b>Intervention:</b><br/>n=37 (females: 26)<br/>Mean age (SD): 42 (15)</p> <p><b>Control:</b><br/>n=37 (females: 26)<br/>Mean age (SD): 44 (16)</p>                                                                             | <p><b>Type:</b> Fermented milk with yoghurt bacteria (<i>Lactobacillus bulgaricus</i> and <i>Streptococcus thermophiles</i>) and 3 probiotics: <i>L. paracasei</i>, <i>ssp. paracasei</i> F19, <i>L. acidophilus</i> La5 and <i>Bifidobacterium lactis</i> Bb12 (Cultura; active)</p> <p><b>Probiotic Dosage:</b> 5x10<sup>7</sup> CFU/ml each 400 ml/ day</p> <p><b>Additional supplement:</b> None</p> <p><b>Probiotic Duration:</b> 8 weeks</p> | <ul style="list-style-type: none"> <li>• HADS-D</li> </ul> | <ul style="list-style-type: none"> <li>• No statistically significant effect due to treatment identified.</li> </ul> |

|                                                               |                                                                                                                                                                                                                                                                                                                                                                                                                                                                                                                                                                                                                                                                                                                                                                                                                                                                                                           |                                                                                       |                                                                                                                             |                                                          |                                                                                                                                                  |
|---------------------------------------------------------------|-----------------------------------------------------------------------------------------------------------------------------------------------------------------------------------------------------------------------------------------------------------------------------------------------------------------------------------------------------------------------------------------------------------------------------------------------------------------------------------------------------------------------------------------------------------------------------------------------------------------------------------------------------------------------------------------------------------------------------------------------------------------------------------------------------------------------------------------------------------------------------------------------------------|---------------------------------------------------------------------------------------|-----------------------------------------------------------------------------------------------------------------------------|----------------------------------------------------------|--------------------------------------------------------------------------------------------------------------------------------------------------|
|                                                               | <p>relevant to study participation; other gastrointestinal disease(s) explaining the patient's symptoms as judged by the investigator; other severe disease(s) such as malignancy, severe heart disease, kidney disease or neurological disease; symptoms indicating other severe disease(s) such as gastrointestinal bleeding, weight loss or fever; severe psychiatric disease; previous history of drug or alcohol abuse 6 months prior to screening; intolerance or allergy against milk products or gluten; use of other probiotic products 2 weeks prior to study and through the study; consumption of antibiotic one months prior to screening and through the study; consumption of cortisone, NSAID or other anti-inflammatory drugs on a regular basis two weeks prior to screening and throughout the study; pregnant or lactating or planning to become pregnant during the study period</p> |                                                                                       | <p><b>Comparator:</b> Placebo</p> <p><b>Additional supplement:</b> No</p>                                                   |                                                          |                                                                                                                                                  |
| <p>Slykerman et al.<sup>48</sup><br/>2017<br/>New Zealand</p> | <p><b>Study design:</b> RCT</p> <p><b>Dates of recruitment:</b><br/>Dec 2012 – Nov 2014</p>                                                                                                                                                                                                                                                                                                                                                                                                                                                                                                                                                                                                                                                                                                                                                                                                               | <p><b>Intervention:</b><br/>n=193 (female: 193)</p> <p>Mean age (SD): 33.5 (4.24)</p> | <p><b>Type:</b> <i>Lactobacillus rhamnosus</i> (HN001)</p> <p><b>Probiotic Dosage:</b> HN001, 6×10<sup>9</sup> CFUs/day</p> | <ul style="list-style-type: none"> <li>• EPDS</li> </ul> | <ul style="list-style-type: none"> <li>• Mothers in the probiotic treatment group reported significantly lower depression scores than</li> </ul> |

|                                                                  |                                                                                                                                                                                                                                                                                                                                                                                                                                                                                               |                                                                                                                                                                   |                                                                                                                                                                                                                                                                                                                                                                                                                                                                                                |                                                            |                                                                                                                      |
|------------------------------------------------------------------|-----------------------------------------------------------------------------------------------------------------------------------------------------------------------------------------------------------------------------------------------------------------------------------------------------------------------------------------------------------------------------------------------------------------------------------------------------------------------------------------------|-------------------------------------------------------------------------------------------------------------------------------------------------------------------|------------------------------------------------------------------------------------------------------------------------------------------------------------------------------------------------------------------------------------------------------------------------------------------------------------------------------------------------------------------------------------------------------------------------------------------------------------------------------------------------|------------------------------------------------------------|----------------------------------------------------------------------------------------------------------------------|
|                                                                  | <p><b>Inclusion Criteria:</b> Pregnant women 14-16 weeks gestation; English-speaking; planning to breastfeed; if either they or the unborn child's biological father had a history of asthma, hay fever or eczema requiring medication</p> <p><b>Exclusion Criteria:</b> aged &lt;16 years; planning to move outside the study centres during study duration; planning on taking probiotics; serious medical or health problems related to the pregnancy</p>                                  | <p><b>Control:</b><br/>n=187 (female: 187)</p> <p>Mean age (SD): 33.7 (4.44)</p>                                                                                  | <p><b>Additional supplement:</b> None</p> <p><b>Probiotic Duration:</b> 12 months</p> <p><b>Comparator:</b> Placebo</p> <p><b>Additional supplement:</b> None</p>                                                                                                                                                                                                                                                                                                                              |                                                            | <p>those in the placebo group (-1.2, 95% CI (-2.4, -0.1), p=0.035)</p>                                               |
| <p>Smith-Ryan et al.<sup>49</sup><br/>2019<br/>United States</p> | <p><b>Study design:</b> RCT</p> <p><b>Dates of recruitment:</b><br/>Sep 2016 – Jan 2018</p> <p><b>Inclusion Criteria:</b><br/>premenopausal female volunteers between the ages of 21 and 55 years; employed as shift workers (i.e., nurses, certified nursing assistants, emergency medical services personnel), working for at least 6 months on a rotating day/night or night-shift schedule prior to study participation; healthy, with no history of cardiovascular disease or renal,</p> | <p><b>Intervention:</b><br/>n=15 (female: 15)</p> <p>Mean age (SD): 30.5 (7.7)</p> <p><b>Control:</b><br/>n=18 (female: 18)</p> <p>Mean age (SD): 30.2 (10.0)</p> | <p><b>Type:</b> <i>Bifidobacterium bifidum</i> W23, <i>B. lactis</i> W51, <i>B. lactis</i> W52, <i>Lactobacillus acidophilus</i> W37, <i>L. brevis</i> W63, <i>L. casei</i> W56, <i>L. salivarius</i> W24, and <i>Lactococcus lactis</i> (W19 and W58)</p> <p>Prebiotic: resistant maize starch (W117).</p> <p><b>Synbiotic Dosage:</b><br/>Probiotic mixture: <math>2.5 \times 10^9</math> CFU/g, 4g packet/day<br/>Prebiotic mixture: 10g/ day</p> <p><b>Additional supplement:</b> None</p> | <ul style="list-style-type: none"> <li>• HADS-D</li> </ul> | <ul style="list-style-type: none"> <li>• No statistically significant effect due to treatment identified.</li> </ul> |

|                                                                 |                                                                                                                                                                                                                                                                                                                                                                                                                                                                              |                                                                                                                                                            |                                                                                                                                                                                                                                                                                                                                                                                                                                                                                  |                                                                              |                                                                                                                                                                                                     |
|-----------------------------------------------------------------|------------------------------------------------------------------------------------------------------------------------------------------------------------------------------------------------------------------------------------------------------------------------------------------------------------------------------------------------------------------------------------------------------------------------------------------------------------------------------|------------------------------------------------------------------------------------------------------------------------------------------------------------|----------------------------------------------------------------------------------------------------------------------------------------------------------------------------------------------------------------------------------------------------------------------------------------------------------------------------------------------------------------------------------------------------------------------------------------------------------------------------------|------------------------------------------------------------------------------|-----------------------------------------------------------------------------------------------------------------------------------------------------------------------------------------------------|
|                                                                 | <p>hepatic, or musculoskeletal disorders</p> <p><b>Exclusion Criteria:</b> not maintained a stable body mass (<math>\pm 3</math> kg); had been consuming a daily probiotic supplement in the 2 months prior to baseline testing</p>                                                                                                                                                                                                                                          |                                                                                                                                                            | <p><b>Synbiotic Duration:</b> 6 weeks</p> <p><b>Comparator:</b> Placebo</p> <p><b>Additional supplement:</b> None</p>                                                                                                                                                                                                                                                                                                                                                            |                                                                              |                                                                                                                                                                                                     |
| <p>Steenbergen et al.<sup>50</sup><br/>2015<br/>Netherlands</p> | <p><b>Study design:</b> RCT</p> <p><b>Dates of recruitment:</b> NR</p> <p><b>Inclusion Criteria:</b> non-smoking young adults, with no reported cardiac, renal, or hepatic conditions, no allergies or intolerance to lactose or gluten, no prescribed medication or drug use; consuming no more than 3–5 alcohol units per week; no psychiatric or neurological disorders; no personal or family history of depression or migraine</p> <p><b>Exclusion Criteria:</b> NR</p> | <p><b>Intervention:</b><br/>n=20 (female: 15)<br/>Mean age (SD): 20.2 (2.4)</p> <p><b>Control:</b><br/>n=20 (female: 17)<br/>Mean age (SD): 19.7 (1.7)</p> | <p><b>Type:</b> <i>Bifidobacterium bifidum</i> W23, <i>B. lactis</i> W52, <i>Lactobacillus acidophilus</i> W37, <i>L. brevis</i> W63, <i>L. casei</i> W56, <i>L. salivarius</i> W24, and <i>Lactococcus lactis</i> (W19 and W58)</p> <p><b>Probiotic Dosage:</b> <math>2.5 \times 10^9</math> CFUs/g, 2g/day</p> <p><b>Additional supplement:</b> None</p> <p><b>Probiotic Duration:</b> 4 weeks</p> <p><b>Comparator:</b> Placebo</p> <p><b>Additional supplement:</b> None</p> | <ul style="list-style-type: none"> <li>• LEIDS-R</li> <li>• BDI-2</li> </ul> | <ul style="list-style-type: none"> <li>• Probiotic significantly improved LEIDS-R (<math>p &lt; 0.001</math>).</li> <li>• No evidence of significant improvement in BDI due to probiotic</li> </ul> |
| <p>Vaghef-Mehrabany et al.<sup>51</sup><br/>2019<br/>Iran</p>   | <p><b>Study design:</b> RCT</p> <p><b>Dates of recruitment:</b> Jun 2018- Sept 2018</p> <p><b>Inclusion Criteria:</b> female, 20-50 years old; diagnosed with MDD</p>                                                                                                                                                                                                                                                                                                        | <p><b>Intervention:</b><br/>n= 31 (females: 31)<br/>Mean age (SD): 37.45 (6.77)</p> <p><b>Control:</b></p>                                                 | <p><b>Type:</b> Inulin</p> <p><b>Prebiotic Dosage:</b> 10 g/ day</p> <p><b>Additional supplement:</b> None</p> <p><b>Prebiotic Duration:</b> 8 weeks</p>                                                                                                                                                                                                                                                                                                                         | <ul style="list-style-type: none"> <li>• HAM-D</li> <li>• BDI-2</li> </ul>   | <ul style="list-style-type: none"> <li>• No statistically significant effect due to treatment identified.</li> </ul>                                                                                |

|                                                         |                                                                                                                                                                                                                                                                                                                                                                                                                                                                                                                             |                                                                                                 |                                                                                         |                                                                                                                                                                                                                                                                                                                                                                                                                      |                                                              |                                                                                                                      |
|---------------------------------------------------------|-----------------------------------------------------------------------------------------------------------------------------------------------------------------------------------------------------------------------------------------------------------------------------------------------------------------------------------------------------------------------------------------------------------------------------------------------------------------------------------------------------------------------------|-------------------------------------------------------------------------------------------------|-----------------------------------------------------------------------------------------|----------------------------------------------------------------------------------------------------------------------------------------------------------------------------------------------------------------------------------------------------------------------------------------------------------------------------------------------------------------------------------------------------------------------|--------------------------------------------------------------|----------------------------------------------------------------------------------------------------------------------|
|                                                         | <p>based on DSM-5 criteria ; antidepressant therapy for at least 6 months before the study; obese BMI: 30–40 kg/m<sup>2</sup>; non-menopausal</p> <p><b>Exclusion Criteria:</b> Pregnancy or lactation; co-morbidity with other major psychiatric or neurological diseases, or thyroid dysfunctions; drug/ substance abuse or smoking; under weight-loss diets or weight loss drugs during the last year; using fiber, prebiotic or probiotic products or supplements or antibiotics during 2 months prior to the study</p> | <p>n=31 (females: 31)</p> <p>Mean age (SD): 40.0 (8.66)</p>                                     | <p><b>Comparator:</b> Placebo</p> <p><b>Additional supplement:</b> None</p>             |                                                                                                                                                                                                                                                                                                                                                                                                                      |                                                              |                                                                                                                      |
| <p>Vidot et al.<sup>52</sup><br/>2019<br/>Australia</p> | <p><b>Study design:</b> RCT</p> <p><b>Dates of recruitment:</b><br/>NR</p> <p><b>Inclusion Criteria:</b> Adult patients with hepatic cirrhosis and a history of hepatic encephalopathy who attended a liver clinic. Participants were required to be on daily lactulose therapy, abstinent from alcohol and intravenous drug use for at least 3 months prior to study entry, and if on methadone, were required to be dose-stable</p>                                                                                       | <p><b>Intervention (Synbiotic):</b><br/>n= 12 (females: 1)</p> <p>Mean age (SD): 56.7 (7.5)</p> | <p><b>Control (Placebo):</b><br/>n=12 (females: 1)</p> <p>Mean age (SD): 54.1 (6.7)</p> | <p><b>Type:</b> <i>Lactobacillus paracasei</i> ssp. <i>paracasei</i>, <i>L. plantarum</i>, <i>Leuconostoc mesenteroides</i>, <i>Pediococcus pentosaceus</i>, oat bran, pectin, resistant starch, inulin</p> <p><b>Dosage:</b> 10x10<sup>11</sup> CFU/sachet of each species, 2.5g of each prebiotic.</p> <p><b>Additional supplement:</b> None</p> <p><b>Duration:</b> 8 weeks</p> <p><b>Comparator:</b> Placebo</p> | <ul style="list-style-type: none"> <li>• DASS21-D</li> </ul> | <ul style="list-style-type: none"> <li>• No statistically significant effect due to treatment identified.</li> </ul> |

|                                                                                                                                                                                                                                                                                                                                                                                                                                                                                                                                                                                                                                                                                                                                                                                                                                                                                                                                                                                                                                                                                                                                                                                                  |                                                                                                                                                                                                                                                                             |  |                                           |  |  |
|--------------------------------------------------------------------------------------------------------------------------------------------------------------------------------------------------------------------------------------------------------------------------------------------------------------------------------------------------------------------------------------------------------------------------------------------------------------------------------------------------------------------------------------------------------------------------------------------------------------------------------------------------------------------------------------------------------------------------------------------------------------------------------------------------------------------------------------------------------------------------------------------------------------------------------------------------------------------------------------------------------------------------------------------------------------------------------------------------------------------------------------------------------------------------------------------------|-----------------------------------------------------------------------------------------------------------------------------------------------------------------------------------------------------------------------------------------------------------------------------|--|-------------------------------------------|--|--|
|                                                                                                                                                                                                                                                                                                                                                                                                                                                                                                                                                                                                                                                                                                                                                                                                                                                                                                                                                                                                                                                                                                                                                                                                  | <p>for a minimum of 3 months prior to study entry.</p> <p><b>Exclusion Criteria:</b> Celiac disease or a history of gluten sensitivity; current use of a probiotic or if they were taking rifaximin, or if random blood glucose levels were <math>\geq 15</math>mmol/L.</p> |  | <p><b>Additional supplement:</b> None</p> |  |  |
| <p><b>Abbreviations:</b> RCT – randomized controlled trial; MDD – major depressive disorder; DSM-IV/V – Diagnostic and Statistical Manual of Mental Disorders IV/V; CFU – colony forming units; BDI – Beck Depression Inventory; HIV/AIDS – human immunodeficiency virus/ acquired immunodeficiency syndrome; DASS21/42-D – Depression Anxiety and Stress Scales 21/42 items-Depression Scale; LEIDS-R – Leiden Index of Depression Sensitivity-Revised; GDS-SF – Geriatric Depression Scale-Short Form; NR – not reported; HAM-D – Hamilton Depression Rating Scale; POMS-2 – Profile of Mood States 2; PHQ-9/15 – Patient Health Questionnaire-9/15 items; MS – multiple sclerosis; IBS – irritable bowel syndrome; HADS-D – Hospital Anxiety and Depression Scale-Depression Score; MADRS - Montgomery-Åsberg Depression Rating Scale; CES-D – Centre for Epidemiological Studies-Depression Scale; TRD – treatment resistant depression; QIDS – Quick Inventory of Depressive Symptomatology; Zung-SDS – Zung Self-Rating Depression Scale; EPDS – Edinburgh Postnatal Depression Scale; SSRI - selective-serotonin reuptake inhibitor; SNRI - serotonin-noradrenalin reuptake inhibitor</p> |                                                                                                                                                                                                                                                                             |  |                                           |  |  |



Characteristics of studies presenting insufficient information for inclusion in meta-analysis:

| Author, Year, Country                                 | Research Methods                                                                                                                                                                                                                                                                                                                                                                                                                                                                                                                                                                                                                                                                                  | Participant Characteristics                                                                                                                                          | Intervention                                                                                                                                                                                                                                                           | Relevant Outcomes                                          | Findings                                                                                                             | Reason for Exclusion from Meta-Analysis                                          |
|-------------------------------------------------------|---------------------------------------------------------------------------------------------------------------------------------------------------------------------------------------------------------------------------------------------------------------------------------------------------------------------------------------------------------------------------------------------------------------------------------------------------------------------------------------------------------------------------------------------------------------------------------------------------------------------------------------------------------------------------------------------------|----------------------------------------------------------------------------------------------------------------------------------------------------------------------|------------------------------------------------------------------------------------------------------------------------------------------------------------------------------------------------------------------------------------------------------------------------|------------------------------------------------------------|----------------------------------------------------------------------------------------------------------------------|----------------------------------------------------------------------------------|
| Azpiroz et al. <sup>53</sup><br>2017<br>France, Spain | <p><b>Study design:</b> RCT</p> <p><b>Dates of Recruitment:</b> NR</p> <p><b>Inclusion Criteria:</b> IBS patients (18-60 years age) fulfilling Rome III criteria</p> <p><b>Exclusion Criteria:</b> Antibiotic use in the last two months, were currently under treatment for depression, presented known psychiatric pathology, had a history of organic intestinal disease, gastrointestinal surgery, family history of colon cancer, inflammatory bowel disease, thyroid dysfunction, Hirschsprung disease, diabetes, anorexia, scleroderma, pregnancy, known allergy, alcohol or tobacco abuse (more than 30g alcohol or 20 cigarettes per day) or were included in another clinical study</p> | <p><b>Intervention:</b><br/>n=41 (females: 32)</p> <p>Mean age (SD): 41.0 (11.1)</p> <p><b>Control:</b><br/>n=38 (females: 28)</p> <p>Mean age (SD): 42.4 (10.6)</p> | <p><b>Type:</b> Short chain fructooligosaccharides</p> <p><b>Prebiotic Dosage:</b> 5g /day</p> <p><b>Additional supplement:</b><br/>None</p> <p><b>Prebiotic Duration:</b> 28 days</p> <p><b>Comparator:</b> Placebo</p> <p><b>Additional supplement:</b><br/>None</p> | <ul style="list-style-type: none"> <li>• HADS-D</li> </ul> | <ul style="list-style-type: none"> <li>• No statistically significant effect due to treatment identified.</li> </ul> | <ul style="list-style-type: none"> <li>• Insufficient detail reported</li> </ul> |
| Cremon et al. <sup>54</sup><br>2018                   | <p><b>Study design:</b> RCT – Cross over</p> <p><b>Dates of recruitment:</b> NR</p>                                                                                                                                                                                                                                                                                                                                                                                                                                                                                                                                                                                                               | <p><b>Intervention:</b><br/>n=20 (females: 11)</p>                                                                                                                   | <p><b>Type:</b> <i>Lactobacillus paracasei</i> CNCM I-1572 (LCDG)</p>                                                                                                                                                                                                  | <ul style="list-style-type: none"> <li>• HADS-D</li> </ul> | <ul style="list-style-type: none"> <li>• No statistically significant effect</li> </ul>                              |                                                                                  |

|       |                                                                                                                                                                                                                                                                                                                                                                                                                                                                                                                                                                                                                                                                                                                                                                                                                                                                                                                                                                                  |                                                                                                                             |                                                                                                                                                                                                                                                                                 |  |                                     |                                                                                |
|-------|----------------------------------------------------------------------------------------------------------------------------------------------------------------------------------------------------------------------------------------------------------------------------------------------------------------------------------------------------------------------------------------------------------------------------------------------------------------------------------------------------------------------------------------------------------------------------------------------------------------------------------------------------------------------------------------------------------------------------------------------------------------------------------------------------------------------------------------------------------------------------------------------------------------------------------------------------------------------------------|-----------------------------------------------------------------------------------------------------------------------------|---------------------------------------------------------------------------------------------------------------------------------------------------------------------------------------------------------------------------------------------------------------------------------|--|-------------------------------------|--------------------------------------------------------------------------------|
| Italy | <p><b>Inclusion Criteria:</b> 18- 65 years old diagnosed with all IBS subtypes; negative colonoscopy or barium enema examination within the previous 2 years, and negative relevant additional screening or consultation whenever appropriate.</p> <p><b>Exclusion Criteria:</b> pregnant, breast-feeding, or not using 11 reliable methods of contraception; intestinal organic diseases, such as celiac disease, diverticular disease, or inflammatory bowel diseases (IBDs; e.g., Crohn's disease, ulcerative 14 colitis, infectious colitis, ischemic colitis, or microscopic colitis); previous major abdominal surgery; untreated food intolerance, such as ascertained or suspected lactose intolerance; consumption of probiotics or topical and/or systemic antibiotic therapy during the month before study enrolment; frequent consumption of contact laxatives; presence of any relevant organic, systemic, or metabolic disease as assessed by medical history,</p> | <p>Mean age (SD): 37.35 (11.25)</p> <hr/> <p><b>Control:</b><br/>n=20 (females: 15)</p> <p>Mean age (SD): 44.55 (12.98)</p> | <p><b>Probiotic Dosage:</b> 24 billion viable cells of the bacterial strain LCDG each capsule 2/day</p> <p><b>Additional supplement:</b><br/>None</p> <p><b>Probiotic Duration:</b> 4 weeks</p> <p><b>Comparator:</b> Placebo</p> <p><b>Additional supplement:</b><br/>None</p> |  | <p>due to treatment identified.</p> | <ul style="list-style-type: none"> <li>Insufficient detail reported</li> </ul> |
|-------|----------------------------------------------------------------------------------------------------------------------------------------------------------------------------------------------------------------------------------------------------------------------------------------------------------------------------------------------------------------------------------------------------------------------------------------------------------------------------------------------------------------------------------------------------------------------------------------------------------------------------------------------------------------------------------------------------------------------------------------------------------------------------------------------------------------------------------------------------------------------------------------------------------------------------------------------------------------------------------|-----------------------------------------------------------------------------------------------------------------------------|---------------------------------------------------------------------------------------------------------------------------------------------------------------------------------------------------------------------------------------------------------------------------------|--|-------------------------------------|--------------------------------------------------------------------------------|

|                                                         |                                                                                                                                                                                                                                                                                                                                                                                                                                                                                                                                                                                                                                                                                                                                                                                                                             |                                                                                                                                                                             |                                                                                                                                                                                                                                                                                                                                                                         |                                                           |                                                                                                                      |                                                                                  |
|---------------------------------------------------------|-----------------------------------------------------------------------------------------------------------------------------------------------------------------------------------------------------------------------------------------------------------------------------------------------------------------------------------------------------------------------------------------------------------------------------------------------------------------------------------------------------------------------------------------------------------------------------------------------------------------------------------------------------------------------------------------------------------------------------------------------------------------------------------------------------------------------------|-----------------------------------------------------------------------------------------------------------------------------------------------------------------------------|-------------------------------------------------------------------------------------------------------------------------------------------------------------------------------------------------------------------------------------------------------------------------------------------------------------------------------------------------------------------------|-----------------------------------------------------------|----------------------------------------------------------------------------------------------------------------------|----------------------------------------------------------------------------------|
|                                                         | appropriate consultations, and laboratory tests; or abnormal laboratory values deemed clinically significant on the basis of predefined values                                                                                                                                                                                                                                                                                                                                                                                                                                                                                                                                                                                                                                                                              |                                                                                                                                                                             |                                                                                                                                                                                                                                                                                                                                                                         |                                                           |                                                                                                                      |                                                                                  |
| Dickerson et al. <sup>55</sup><br>2018<br>United States | <p><b>Study design:</b> RCT</p> <p><b>Dates of Recruitment:</b><br/>Nov 2012 - Dec 2016</p> <p><b>Inclusion Criteria:</b> Age 18-65 years, inclusive; capacity to provide written informed consent; current admission to an inpatient or day hospital program for symptoms of a manic episode and with a primary diagnosis of bipolar I (single manic episode, most recent episode manic, or most recent episode mixed) or schizoaffective disorder, bipolar type (manic or mixed state) (DSM-IV-TR) confirmed with the Structured Clinical Interview for Diagnosis for DSM-IV Axis I disorders; proficient in English; and available for follow-up visits</p> <p><b>Exclusion Criteria:</b> Substance or medically induced symptoms of mania at hospital admission; HIV infection or other immunodeficiency condition;</p> | <p><b>Intervention:</b><br/>n=33 (females: 24)</p> <p>Mean age (SD): 37.9 (11.7)</p> <hr/> <p><b>Control:</b><br/>n= 33 (females: 18)</p> <p>Mean age (SD): 33.3 (13.3)</p> | <p><b>Type:</b> <i>Lactobacillus rhamnosus</i> strain GG and <i>Bifidobacterium animalis</i> subsp. <i>Lactis</i> strain Bb12</p> <p><b>Probiotic Dosage:</b> &gt;10<sup>8</sup> CFU daily</p> <p><b>Additional supplement:</b><br/>None</p> <p><b>Probiotic Duration:</b> 24 weeks</p> <p><b>Comparator:</b> Placebo</p> <p><b>Additional supplement:</b><br/>None</p> | <ul style="list-style-type: none"> <li>• MADRS</li> </ul> | <ul style="list-style-type: none"> <li>• No statistically significant effect due to treatment identified.</li> </ul> | <ul style="list-style-type: none"> <li>• Insufficient detail reported</li> </ul> |

|                                                    |                                                                                                                                                                                                                                                                                                                                                                                                                |                                                                                                                                                                                         |                                                                                                                                                                                                                                                                                                                 |                                                                                |                                                                                                        |                                                                                                        |
|----------------------------------------------------|----------------------------------------------------------------------------------------------------------------------------------------------------------------------------------------------------------------------------------------------------------------------------------------------------------------------------------------------------------------------------------------------------------------|-----------------------------------------------------------------------------------------------------------------------------------------------------------------------------------------|-----------------------------------------------------------------------------------------------------------------------------------------------------------------------------------------------------------------------------------------------------------------------------------------------------------------|--------------------------------------------------------------------------------|--------------------------------------------------------------------------------------------------------|--------------------------------------------------------------------------------------------------------|
|                                                    | serious medical condition affecting brain or cognitive functioning; diagnosis of mental retardation; diagnosis of substance abuse or dependence according to DSM-IV-TR criteria within the last 3 months; history of any intravenous drug use; participation in an investigational drug trial in the past 30 days; pregnant or planning to become pregnant during the study period; documented celiac disease. |                                                                                                                                                                                         |                                                                                                                                                                                                                                                                                                                 |                                                                                |                                                                                                        |                                                                                                        |
| Kato-Kataoka et al. <sup>56</sup><br>2016<br>Japan | <p><b>Study design:</b> RCT</p> <p><b>Dates of recruitment:</b> Oct 2012-Jan 2013</p> <p><b>Inclusion Criteria:</b> Medical students</p> <p><b>Exclusion Criteria:</b> Over 30 years of age, habitual smoking, taking medication, mental and other diseases, and milk allergy or other allergies for 3 months prior to enrolment.</p>                                                                          | <p><b>Intervention (Probiotic):</b> n=24 (females:10)</p> <p>Mean age (SD): 23.0 (0.4)</p> <p><b>Control-non fermented milk:</b> n=23 (females:11)</p> <p>Mean age (SD): 22.7 (0.4)</p> | <p><b>Type:</b> Fermented milk with <i>Lactobacillus casei</i> strain Shirota</p> <p><b>Probiotic Dosage:</b> &gt;1.0x10<sup>9</sup> CFU/mL</p> <p><b>Additional supplement:</b> None</p> <p><b>Probiotic Duration:</b> 8 weeks</p> <p><b>Comparator:</b> Placebo</p> <p><b>Additional supplement:</b> None</p> | <ul style="list-style-type: none"> <li>• HADS-D</li> <li>• Zung SDS</li> </ul> | <ul style="list-style-type: none"> <li>• Outcome at end of treatment duration not reported.</li> </ul> | <ul style="list-style-type: none"> <li>• Outcome at end of intervention period not reported</li> </ul> |
| Nishida et al. <sup>57</sup><br>2017<br>Japan      | <p><b>Study design:</b> RCT</p> <p><b>Dates of recruitment:</b></p>                                                                                                                                                                                                                                                                                                                                            | <p><b>Intervention:</b> n= 16 (females: 5)</p>                                                                                                                                          | <p><b>Type:</b> Heat killed <i>Lactobacillus gasseri</i> strain CP2305</p>                                                                                                                                                                                                                                      | <ul style="list-style-type: none"> <li>• Zung-SDS</li> <li>• HADS-D</li> </ul> | <ul style="list-style-type: none"> <li>• No statistically significant effect</li> </ul>                |                                                                                                        |

|                                                    |                                                                                                                                                                                                                                                                                                                                                                                                                                                                                                                                                                 |                                                                                                                                                     |                                                                                                                                                                                                                                                                                                          |                                                       |                                                                                                                    |                                                                                |
|----------------------------------------------------|-----------------------------------------------------------------------------------------------------------------------------------------------------------------------------------------------------------------------------------------------------------------------------------------------------------------------------------------------------------------------------------------------------------------------------------------------------------------------------------------------------------------------------------------------------------------|-----------------------------------------------------------------------------------------------------------------------------------------------------|----------------------------------------------------------------------------------------------------------------------------------------------------------------------------------------------------------------------------------------------------------------------------------------------------------|-------------------------------------------------------|--------------------------------------------------------------------------------------------------------------------|--------------------------------------------------------------------------------|
|                                                    | <p>Sept 2007 – Oct 2007</p> <p><b>Inclusion Criteria:</b> Second year undergraduate medical students at Tokushima University between 18 – 24 years of age</p> <p><b>Exclusion Criteria:</b> Habitual smokers, medication taken for 3 months prior to enrolment, individuals with psychological or physical disorders or milk or other food allergies</p>                                                                                                                                                                                                        | <p>Mean age (SEM): 20.75 (0.40)</p> <p><b>Control:</b><br/>n= 16 (females: 6)</p> <p>Mean age (SEM): 21.31 (0.90)</p>                               | <p><b>Para-probiotic Dosage:</b><br/>1 x 10<sup>10</sup> bacterial cells/day</p> <p><b>Additional supplement:</b><br/>None</p> <p><b>Para-probiotic Duration:</b> 5 weeks</p> <p><b>Comparator:</b> Placebo</p> <p><b>Additional supplement:</b><br/>None</p>                                            |                                                       | <p>of intervention on HADS-D</p> <ul style="list-style-type: none"> <li>Zung-SDS outcomes not reported</li> </ul>  | <ul style="list-style-type: none"> <li>Insufficient detail reported</li> </ul> |
| <p>Rao et al.<sup>58</sup><br/>2009<br/>Canada</p> | <p><b>Study design:</b> RCT</p> <p><b>Dates of recruitment:</b> NR</p> <p><b>Inclusion Criteria:</b> Candidates for inclusion were screened from a pool of Chronic Fatigue Syndrome patients in a tertiary setting. Adult patients aged 18 – 65 in the formal diagnostic criteria for CFS and suitability to complete a two-month trial, provide written informed consent.</p> <p><b>Exclusion Criteria:</b> patients with unstable physical illness, severe CFS such that they were largely bedridden, patients meeting criteria for psychiatric disorders</p> | <p><b>Intervention:</b><br/>n=19 (females: NR)</p> <p>Mean age (SD): NR</p> <p><b>Control:</b><br/>n= 16 (females: NR)</p> <p>Mean age (SD): NR</p> | <p><b>Type:</b> <i>Lactobacillus casei</i> strain Shirota</p> <p><b>Probiotic Dosage:</b><br/>8 x 10<sup>9</sup> CFU/day</p> <p><b>Additional supplement:</b><br/>None</p> <p><b>Probiotic Duration:</b><br/>8 weeks</p> <p><b>Comparator:</b> Placebo</p> <p><b>Additional supplement:</b><br/>None</p> | <ul style="list-style-type: none"> <li>BDI</li> </ul> | <ul style="list-style-type: none"> <li>No statistically significant effect due to treatment identified.</li> </ul> | <ul style="list-style-type: none"> <li>Insufficient detail reported</li> </ul> |

|                                                        |                                                                                                                                                                                                                                                                                                                                                                                                                                          |                                                                                                                                                                                    |                                                                                                                                                                                                                                                                                                                                                                                                                                                               |                                                            |                                                                                                                      |                                                                                  |
|--------------------------------------------------------|------------------------------------------------------------------------------------------------------------------------------------------------------------------------------------------------------------------------------------------------------------------------------------------------------------------------------------------------------------------------------------------------------------------------------------------|------------------------------------------------------------------------------------------------------------------------------------------------------------------------------------|---------------------------------------------------------------------------------------------------------------------------------------------------------------------------------------------------------------------------------------------------------------------------------------------------------------------------------------------------------------------------------------------------------------------------------------------------------------|------------------------------------------------------------|----------------------------------------------------------------------------------------------------------------------|----------------------------------------------------------------------------------|
|                                                        | other than depression and/or anxiety                                                                                                                                                                                                                                                                                                                                                                                                     |                                                                                                                                                                                    |                                                                                                                                                                                                                                                                                                                                                                                                                                                               |                                                            |                                                                                                                      |                                                                                  |
| Smith et al. <sup>59</sup><br>2005<br>United Kingdom   | <p><b>Study design:</b> RCT- Crossover</p> <p><b>Dates of recruitment:</b> Not reported</p> <p><b>Inclusion Criteria:</b> Volunteers</p> <p><b>Exclusion Criteria:</b> Not reported</p>                                                                                                                                                                                                                                                  | <p><b>Intervention:</b><br/>n= 142 (females: 72)</p> <p>Mean age (range): 32 (19-64)</p> <hr/> <p><b>Control:</b><br/>n= 142 (females: 72)</p> <p>Mean age (range): 32 (19-64)</p> | <p><b>Type:</b> Oligofructose-enriched Inulin</p> <p><b>Prebiotic Dosage:</b> 5 g per each sachet of dry powder 2/ day</p> <p><b>Prebiotic Duration:</b> 2 weeks</p> <p><b>Comparator:</b> placebo</p> <p><b>Additional supplement:</b> No</p>                                                                                                                                                                                                                | <ul style="list-style-type: none"> <li>• HADS-D</li> </ul> | <ul style="list-style-type: none"> <li>• No statistically significant effect due to treatment identified.</li> </ul> | <ul style="list-style-type: none"> <li>• Prebiotic intervention</li> </ul>       |
| Tillisch et al. <sup>60</sup><br>2013<br>United States | <p><b>Study design:</b> RCT</p> <p><b>Dates of recruitment:</b> NR</p> <p><b>Inclusion Criteria:</b> 18-55 years of age; healthy women with no gastrointestinal or psychiatric symptoms; , body mass index 18 –30; have not taken antibiotics or probiotics in the month prior to the study and were willing to avoid use of probiotics for the duration of the study</p> <p><b>Exclusion Criteria:</b> Lactose intolerance; chronic</p> | <p><b>Intervention:</b><br/>n= 12 (females: 12)</p> <p>Mean age (SD): NR</p> <hr/> <p><b>Control- nonfermented milk:</b><br/>n= 11 (females: 11)</p> <p>Mean age (SD): NR</p>      | <p><b>Type:</b> Fermented milk product with probiotic: <i>Bifidobacterium animalis</i> subsp <i>Lactis</i>, <i>Streptococcus thermophiles</i>, <i>Lactobacillus bulgaricus</i>, and <i>Lactococcus lactis</i> subsp <i>Lactis</i></p> <p><b>Probiotic Dosage:</b> 1.25x10<sup>10</sup> CFUs <i>B lactis</i> CNCM I-2494/DN-173 010/ cup and 1.2 × 10<sup>9</sup> CFU/cup of <i>S thermophilus</i> and <i>L bulgaricus</i>. 125-g pot consumed twice daily</p> | <ul style="list-style-type: none"> <li>• HADS-D</li> </ul> | <ul style="list-style-type: none"> <li>• No statistically significant effect due to treatment identified.</li> </ul> | <ul style="list-style-type: none"> <li>• Insufficient detail reported</li> </ul> |

|                                                         |                                                                                                                                                                                                                                                                                                                                                                                                                                                                                                                                                                                                                         |                                                                                                                                                                                                                                                                                                                                                                       |                                                                                                                                                                                                                                                                                                                                                                                                                                                                     |                                                            |                                                                                                                      |                                                                                  |
|---------------------------------------------------------|-------------------------------------------------------------------------------------------------------------------------------------------------------------------------------------------------------------------------------------------------------------------------------------------------------------------------------------------------------------------------------------------------------------------------------------------------------------------------------------------------------------------------------------------------------------------------------------------------------------------------|-----------------------------------------------------------------------------------------------------------------------------------------------------------------------------------------------------------------------------------------------------------------------------------------------------------------------------------------------------------------------|---------------------------------------------------------------------------------------------------------------------------------------------------------------------------------------------------------------------------------------------------------------------------------------------------------------------------------------------------------------------------------------------------------------------------------------------------------------------|------------------------------------------------------------|----------------------------------------------------------------------------------------------------------------------|----------------------------------------------------------------------------------|
|                                                         | gastrointestinal symptoms; chronic or acute pain disorder; psychiatric disorder or other medical condition; subjects with <i>Bifidobacterium lactis</i> present in the stool at baseline, as well as subjects in the Control and No-Intervention groups, who had <i>B lactis</i> in the stool at study completion                                                                                                                                                                                                                                                                                                       | <b>Control- no intervention:</b><br>n= 13 (females: 13)<br>Mean age (SD): NR                                                                                                                                                                                                                                                                                          | <b>Additional supplement:</b><br>None<br><br><b>Probiotic Duration:</b> 2 weeks<br><br><b>Comparator:</b> Placebo<br><br><b>Additional supplement:</b><br>None                                                                                                                                                                                                                                                                                                      |                                                            |                                                                                                                      |                                                                                  |
| Whorwell et al. <sup>61</sup><br>2006<br>United Kingdom | <b>Study design:</b> RCT<br><br><b>Dates of recruitment:</b> NR<br><br><b>Inclusion Criteria:</b> Women 18-65 years old diagnosed with IBS and in whom organic diseases, including inflammatory bowel disease, and significant systemic diseases had been excluded<br><br><b>Exclusion Criteria:</b> Pregnant; over 55 years of age and had not had a sigmoidoscopy or colonoscopy performed in the previous 5 years, had used antipsychotic medications within the prior 3 months or systemic steroids within the prior month, had suffered major psychiatric disorder within the past 2 years; lactose intolerance or | <b>Intervention 1- BIFIDO6:</b><br>n=90 (females: 90)<br><br>Mean age (SD): 40.8 (1.10)<br><br><b>Intervention 2- BIFIDO8:</b><br>n=90 (females: 90)<br><br>Mean age (SD): 42.7 (1.10)<br><br><b>Intervention 3- BIFIDO10:</b><br>n=90 (females: 90)<br><br>Mean age (SD): 41.8 (1.10)<br><br><b>Control:</b><br>n=92 (females: 92)<br><br>Mean age (SD): 42.4 (1.09) | <b>Type:</b> <i>Bifidobacterium infantis</i> 35624 (BIFIDO)<br><br><b>Probiotic Dosage:</b><br><i>BIFIDO6</i> 1x10 <sup>6</sup> CFU/ ml each capsule 1/ day<br><i>BIFIDO8</i> 1x10 <sup>8</sup> CFU/ ml each capsule 1/ day<br><i>BIFIDO10</i> 1x10 <sup>10</sup> CFU/ ml each capsule 1/ day<br><br><b>Additional supplement:</b><br>None<br><br><b>Probiotic Duration:</b> 4 weeks<br><br><b>Comparator:</b> Placebo<br><br><b>Additional supplement:</b><br>None | <ul style="list-style-type: none"> <li>• HADS-D</li> </ul> | <ul style="list-style-type: none"> <li>• No statistically significant effect due to treatment identified.</li> </ul> | <ul style="list-style-type: none"> <li>• Insufficient detail reported</li> </ul> |

|                                                                                                                                                                                                                                                                                                                                                                                                                                                                                                                                                                                                                                                                  |                                                                                                                                                                                                                                                                                                                                                                                                                                                                                                                                                                |                                                                                                                                                                       |                                                                                                                                                                                                                                                                                                                                                                                                                                                                                                                                                                  |                                                            |                                                                                                                      |                                                                                  |
|------------------------------------------------------------------------------------------------------------------------------------------------------------------------------------------------------------------------------------------------------------------------------------------------------------------------------------------------------------------------------------------------------------------------------------------------------------------------------------------------------------------------------------------------------------------------------------------------------------------------------------------------------------------|----------------------------------------------------------------------------------------------------------------------------------------------------------------------------------------------------------------------------------------------------------------------------------------------------------------------------------------------------------------------------------------------------------------------------------------------------------------------------------------------------------------------------------------------------------------|-----------------------------------------------------------------------------------------------------------------------------------------------------------------------|------------------------------------------------------------------------------------------------------------------------------------------------------------------------------------------------------------------------------------------------------------------------------------------------------------------------------------------------------------------------------------------------------------------------------------------------------------------------------------------------------------------------------------------------------------------|------------------------------------------------------------|----------------------------------------------------------------------------------------------------------------------|----------------------------------------------------------------------------------|
|                                                                                                                                                                                                                                                                                                                                                                                                                                                                                                                                                                                                                                                                  | immunodeficiency; had undergone any abdominal surgery, with the exception of hernia repair or appendectomy                                                                                                                                                                                                                                                                                                                                                                                                                                                     |                                                                                                                                                                       |                                                                                                                                                                                                                                                                                                                                                                                                                                                                                                                                                                  |                                                            |                                                                                                                      |                                                                                  |
| Wong et al. <sup>62</sup><br>2015<br>Singapore                                                                                                                                                                                                                                                                                                                                                                                                                                                                                                                                                                                                                   | <p><b>Study design:</b> RCT</p> <p><b>Dates of recruitment:</b> NR</p> <p><b>Inclusion Criteria:</b> 20 - 76 years old, diagnosed with IBS</p> <p><b>Exclusion Criteria:</b> Stool culture was positive for bacterial pathogens (Salmonella and Shigella); parasites (Giardia) and ova/cysts on microscopy; positive faecal occult blood test; pregnant or breast-feeding; had organic gastrointestinal, anal, hepatic, or other systemic disorders; previous gastrointestinal surgery history except appendectomy; history of cerebral disease or surgery</p> | <p><b>Intervention:</b><br/>n=20 (females: 8)</p> <p>Mean age (SD): 53.35 (4.15)</p> <p><b>Control:</b><br/>n=22 (females: 11)</p> <p>Mean age (SD): 40.86 (3.51)</p> | <p><b>Type:</b> <i>Bifidobacterium</i> (<i>B. longum</i>, <i>B. infantis</i> and <i>B. breve</i>); <i>Lactobacillus</i> (<i>L. acidophilus</i>, <i>L. casei</i>, <i>L. delbrueckii ssp. bulgaricus</i> and <i>L. plantarum</i>); and <i>Streptococcus salivarius ssp. thermophilus</i></p> <p><b>Probiotic Dosage:</b> 112.5 billion viable lyophilized bacteria each capsule 4/ day</p> <p><b>Additional supplement:</b><br/>None</p> <p><b>Probiotic Duration:</b> 6 weeks</p> <p><b>Comparator:</b> Placebo</p> <p><b>Additional supplement:</b><br/>None</p> | <ul style="list-style-type: none"> <li>• HADS-D</li> </ul> | <ul style="list-style-type: none"> <li>• No statistically significant effect due to treatment identified.</li> </ul> | <ul style="list-style-type: none"> <li>• Insufficient detail reported</li> </ul> |
| <p><b>Abbreviations:</b> RCT – randomized controlled trial; NR – not reported; IBS – irritable bowel syndrome; HADS-D – Hospital Anxiety and Depression Scale-Depression Score; CFU – colony forming units; BID – Beck Depression Inventory; POMS – Profile of Mood States; HAM-D – Hamilton Depression Rating Scale; MADRS - Montgomery-Åsberg Depression Rating Scale; DSM-IV-TR – Diagnostic and Statistical Manual of Mental Disorders IV – Text Revision; QIDS – Quick Inventory of Depressive Symptomatology; GI – gastrointestinal; FMT – fecal microbiota transplant; Zung-SDS – Zung Self-Rating Depression Scale; MDD – major depressive disorder;</p> |                                                                                                                                                                                                                                                                                                                                                                                                                                                                                                                                                                |                                                                                                                                                                       |                                                                                                                                                                                                                                                                                                                                                                                                                                                                                                                                                                  |                                                            |                                                                                                                      |                                                                                  |



## Section 6: Studies presenting insufficient information for inclusion in meta-analysis

Randomized controlled trials excluded from meta-analysis for failure to provide necessary information for meta-analysis. If design not indicated in left-most column, study is a parallel arm RCT.

| Author, Year (design)                  | Intervention   | Population                                                             | Assessment Tools | Duration in Weeks (n) | Overall Risk of Bias | Placebo (n) | Intervention (n) | Conclusion                                                               |
|----------------------------------------|----------------|------------------------------------------------------------------------|------------------|-----------------------|----------------------|-------------|------------------|--------------------------------------------------------------------------|
| Azpiroz, 2017 <sup>53</sup>            | Prebiotic      | IBS                                                                    | HADS-D           | 4                     | Some Concerns        | 38          | 41               | No statistically significant difference due to intervention              |
| Cremon, 2018 <sup>54</sup> (crossover) | Probiotic      | IBS                                                                    | HADS-D           | 4                     | Some Concerns        | 20          | 20               | No statistically significant difference due to intervention              |
| Dickerson, 2018 <sup>55</sup>          | Probiotic      | Bipolar I; or Schizoaffective Disorder; or Bipolar Type Manic or Mixed | MADRS            | 24                    | Some Concerns        | 33          | 33               | No statistically significant difference due to intervention              |
| Kato-Kataoka, 2016 <sup>56</sup>       | Probiotic      | Medical Students                                                       | Zung SDS, HADS-D | 8                     |                      | 23          | 24               | Not reported at end of intervention period                               |
| Nishida, 2017 <sup>57</sup>            | Para-probiotic | Medical Students                                                       | Zung SDS, HADS-D | 5                     | High                 | 16          | 16               | No statistically significant difference in HADS-D; Zung SDS not reported |
| Rao, 2009 <sup>58</sup>                | Probiotic      | Chronic Fatigue Syndrome                                               | BDI              | 8                     | High                 | 16          | 19               | No statistically significant difference due to intervention              |
| Smith, 2005 <sup>59</sup> (crossover)  | Prebiotic      | Volunteers                                                             | HADS-D           | 2                     | High                 | 142         | 142              | No statistically significant difference due to intervention              |
| Tillisch, 2013 <sup>60</sup>           | Probiotic      | Healthy Women                                                          | HADS-D           | 2                     | High                 | 24          | 12               | No statistically significant difference due to intervention              |
| Whorwell, 2006 <sup>61</sup>           | Probiotic      | IBS                                                                    | HADS-D           | 4                     | High                 | 270         | 92               | No statistically significant difference due to intervention              |
| Wong, 2015 <sup>62</sup>               | Probiotic      | IBS                                                                    | HADS-D           | 6                     | High                 | 22          | 20               | No statistically significant difference due to intervention              |

## Section 7: Risk of bias

Cochrane Risk of Bias 2.0 Results for parallel arm and crossover randomized controlled trials

| First Author (Year)                         | Bias from Randomization | Bias from Deviation | Bias from Missing Outcome Data | Bias from Measurement | Bias in Reported Results | Overall Risk of Bias |
|---------------------------------------------|-------------------------|---------------------|--------------------------------|-----------------------|--------------------------|----------------------|
| <b>Probiotics</b>                           |                         |                     |                                |                       |                          |                      |
| Akkasheh et al. <sup>1</sup> (2016)         | Low Risk                | Low Risk            | Low Risk                       | Low Risk              | Some Concerns            | Some Concerns        |
| Browne et al. <sup>2</sup> (2021)           | Low Risk                | Low Risk            | Low Risk                       | Low Risk              | Low Risk                 | Low Risk             |
| Chahwan et al. <sup>3</sup> (2019)          | Low Risk                | Low Risk            | Low Risk                       | Low Risk              | Some Concerns            | Some Concerns        |
| Chong et al. <sup>4</sup> (2019)            | Low Risk                | Some Concerns       | Low Risk                       | Low Risk              | Some Concerns            | Some Concerns        |
| Chung et al. <sup>5</sup> (2014)            | Low Risk                | Low Risk            | Low Risk                       | Low Risk              | Some Concerns            | Some Concerns        |
| Cremon et al. <sup>54</sup> (2018)          | Low Risk                | Low Risk            | Low Risk                       | Low Risk              | Some Concerns            | Some Concerns        |
| Dawe et al. <sup>6</sup> (2020)             | Low Risk                | Some Concerns       | Low Risk                       | Low Risk              | Some Concerns            | Some Concerns        |
| Dickerson et al. <sup>55</sup> (2018)       | Low Risk                | Some Concerns       | Low Risk                       | Low Risk              | Some Concerns            | Some Concerns        |
| Haghighat et al. <sup>9</sup> (2019)        | Low Risk                | Low Risk            | Low Risk                       | Low Risk              | Some Concerns            | Some Concerns        |
| Heidarzadeh-Rad et al. <sup>10</sup> (2020) | Low Risk                | Low Risk            | Low Risk                       | Low Risk              | Some Concerns            | Some Concerns        |
| Inoue et al. <sup>11</sup> (2018)           | Low Risk                | Low Risk            | Low Risk                       | Low Risk              | Some Concerns            | Some Concerns        |
| Jamilian et al. <sup>12</sup> (2018)        | Low Risk                | Low Risk            | Low Risk                       | Low Risk              | Some Concerns            | Some Concerns        |
| Kato-Kataoka et al. <sup>56</sup> (2016)    | Some Concerns           | Some Concerns       | Low Risk                       | Low Risk              | High Risk                | High Risk            |
| Kazemi et al. <sup>13</sup> (2018)          | Low Risk                | Low Risk            | Low Risk                       | Low Risk              | Some Concerns            | Some Concerns        |
| Kelly et al. <sup>14</sup> (2017)           | Some Concerns           | High Risk           | Low Risk                       | Low Risk              | Some Concerns            | High Risk            |

Appendix 1, as supplied by the authors. Appendix to: Hofmeister M, Clement F, Patten S, et al. The effect of interventions targeting gut microbiota on depressive symptoms: a systematic review and meta-analysis. *CMAJ Open* 2021. DOI:10.9778/cmajo.20200283. Copyright © 2021 The Author(s) or their employer(s). To receive this resource in an accessible format, please contact us at [cmajgroup@cmaj.ca](mailto:cmajgroup@cmaj.ca).

|                                                   |               |               |               |           |               |               |
|---------------------------------------------------|---------------|---------------|---------------|-----------|---------------|---------------|
| Kim et al. <sup>15</sup><br>(2020)                | Low Risk      | Low Risk      | Some Concerns | Low Risk  | Low Risk      | Some Concerns |
| Kouchaki et al. <sup>16</sup><br>(2016)           | Some Concerns | Low Risk      | Low Risk      | Low Risk  | Some Concerns | Some Concerns |
| Lee et al. <sup>17</sup><br>(2021)                | Low Risk      | Some Concerns | Low Risk      | Low Risk  | Low Risk      | Some Concerns |
| Lew et al. <sup>19</sup><br>(2018)                | Low Risk      | Some Concerns | High Risk     | Low Risk  | Some Concerns | High Risk     |
| Lyra et al. <sup>20</sup><br>(2016)               | Low Risk      | Low Risk      | High Risk     | Low Risk  | Low Risk      | High Risk     |
| Majeed et al. <sup>21</sup><br>(2018)             | Low Risk      | Low Risk      | Low Risk      | Low Risk  | Some Concerns | Some Concerns |
| Marotta et al. <sup>22</sup><br>(2019)            | Low Risk      | Some Concerns | Some Concerns | Low Risk  | Some Concerns | High Risk     |
| Messaoudi et al. <sup>23</sup><br>(2011)          | Low Risk      | Low Risk      | Low Risk      | Low Risk  | Some Concerns | Some Concerns |
| Miyaoka et al. <sup>24</sup><br>(2018)            | High Risk     | Some Concerns | Low Risk      | High Risk | Some Concerns | High Risk     |
| Moloney et al. <sup>25</sup><br>(2021)            | Some Concerns | Low Risk      | High Risk     | Low Risk  | Low Risk      | High Risk     |
| Moludi et al. <sup>26</sup><br>(2019)             | Low Risk      | Low Risk      | Low Risk      | Low Risk  | Low Risk      | Low Risk      |
| Moludi et al. <sup>27</sup><br>(2021)             | Low Risk      | Low Risk      | Low Risk      | Low Risk  | Low Risk      | Low Risk      |
| Ostadmohammadi et al. <sup>28</sup><br>(2019)     | Low Risk      | Some Concerns | Low Risk      | Low Risk  | Some Concerns | Some Concerns |
| Östlund-Lagerström et al. <sup>29</sup><br>(2016) | Low Risk      | Low Risk      | Low Risk      | Low Risk  | Some Concerns | Some Concerns |
| Papalini et al. <sup>30</sup><br>(2019)           | Low Risk      | Low Risk      | Low Risk      | Low Risk  | Some Concerns | Some Concerns |
| Patterson et al. <sup>31</sup><br>(2020)          | Low Risk      | Low Risk      | Low Risk      | Low Risk  | High Risk     | High Risk     |
| Pinto-Sanchez et al. <sup>32</sup><br>(2017)      | Low Risk      | Low Risk      | Low Risk      | Low Risk  | Some Concerns | Some Concerns |

Appendix 1, as supplied by the authors. Appendix to: Hofmeister M, Clement F, Patten S, et al. The effect of interventions targeting gut microbiota on depressive symptoms: a systematic review and meta-analysis. *CMAJ Open* 2021. DOI:10.9778/cmajo.20200283. Copyright © 2021 The Author(s) or their employer(s). To receive this resource in an accessible format, please contact us at [cmajgroup@cmaj.ca](mailto:cmajgroup@cmaj.ca).

|                                            |               |               |               |               |               |               |
|--------------------------------------------|---------------|---------------|---------------|---------------|---------------|---------------|
| Qi et al. <sup>33</sup><br>(2020)          | Low Risk      |
| Rahimlou et al. <sup>34</sup><br>(2020)    | Low Risk      | Some Concerns | Low Risk      | Low Risk      | Low Risk      | Some Concerns |
| Rao et al. <sup>58</sup><br>(2009)         | Some Concerns | High Risk     | High Risk     | Low Risk      | Some Concerns | High Risk     |
| Raygan et al. <sup>36</sup><br>(2018)      | Low Risk      | Low Risk      | High Risk     | Low Risk      | Some Concerns | High Risk     |
| Raygan et al. <sup>35</sup><br>(2019)      | Low Risk      | Low Risk      | High Risk     | Low Risk      | Some Concerns | High Risk     |
| Roman et al. <sup>37</sup><br>(2018)       | Low Risk      | Low Risk      | High Risk     | Low Risk      | Some Concerns | High Risk     |
| Romijn et al. <sup>38</sup><br>(2017)      | Some Concerns | Low Risk      | Low Risk      | Low Risk      | Low Risk      | Some Concerns |
| Rudzki et al. <sup>39</sup><br>(2019)      | Low Risk      | Low Risk      | High Risk     | Low Risk      | Low Risk      | High Risk     |
| Saccarello et al. <sup>40</sup><br>(2020)  | Low Risk      | Low Risk      | Low Risk      | Low Risk      | High Risk     | High Risk     |
| Salami et al. <sup>41</sup><br>(2019)      | Low Risk      | Low Risk      | Low Risk      | Low Risk      | Some Concerns | Some Concerns |
| Sawada et al. <sup>43</sup><br>(2017)      | Some Concerns | Low Risk      | Some Concerns | Low Risk      | Some Concerns | High Risk     |
| Sawada et al. <sup>44</sup><br>(2019)      | Some Concerns | Low Risk      | Low Risk      | Low Risk      | Some Concerns | Some Concerns |
| Shahrbabaki et al. <sup>45</sup><br>(2020) | Some Concerns | Some Concerns | Low Risk      | Some Concerns | Low Risk      | Some Concerns |
| Simren et al. <sup>47</sup><br>(2010)      | Low Risk      | Low Risk      | Low Risk      | Low Risk      | Some Concerns | Some Concerns |
| Slykerman et al. <sup>48</sup><br>(2017)   | Low Risk      | Low Risk      | High Risk     | Low Risk      | Low Risk      | High Risk     |
| Steenbergen et al. <sup>50</sup><br>(2015) | Low Risk      | Some Concerns | Low Risk      | Low Risk      | Some Concerns | Some Concerns |
| Tillisch et al. <sup>60</sup><br>(2013)    | Some Concerns | Some Concerns | Low Risk      | Low Risk      | Some Concerns | High Risk     |
| Whorwell et al. <sup>61</sup><br>(2006)    | Some Concerns | Low Risk      | Low Risk      | Low Risk      | Some Concerns | High Risk     |

Appendix 1, as supplied by the authors. Appendix to: Hofmeister M, Clement F, Patten S, et al. The effect of interventions targeting gut microbiota on depressive symptoms: a systematic review and meta-analysis. *CMAJ Open* 2021. DOI:10.9778/cmajo.20200283. Copyright © 2021 The Author(s) or their employer(s). To receive this resource in an accessible format, please contact us at [cmajgroup@cmaj.ca](mailto:cmajgroup@cmaj.ca).

|                                                 |               |               |              |               |               |               |
|-------------------------------------------------|---------------|---------------|--------------|---------------|---------------|---------------|
| Wong et al. <sup>62</sup><br>(2015)             | High Risk     | Some Concerns | Low Risk     | Low Risk      | Some Concerns | High Risk     |
| <b>Prebiotics</b>                               |               |               |              |               |               |               |
| Azpiroz et al. <sup>53</sup><br>(2017)          | Some Concerns | Low Risk      | Low Risk     | Low Risk      | Some Concerns | Some Concerns |
| Heidarzadeh-Rad et al. <sup>10</sup> (2020)     | Low Risk      | Low Risk      | Low Risk     | Low Risk      | Some Concerns | Some Concerns |
| Kazemi et al. <sup>13</sup><br>(2018)           | Low Risk      | Low Risk      | Low Risk     | Low Risk      | Some Concerns | Some Concerns |
| Moludi et al. <sup>27</sup><br>(2021)           | Low Risk      | Low Risk      | Low Risk     | Low Risk      | Low Risk      | Low Risk      |
| Silk et al. <sup>46</sup><br>(2009)             | Some Concerns | Some Concerns | Some Concern | Low Risk      | Some Concerns | High Risk     |
| Smith et al. <sup>59</sup><br>(2005)            | High Risk     | Some Concerns | High Risk    | Some Concerns | Some Concerns | High Risk     |
| Vaghef-Mehrabany et al. <sup>51</sup><br>(2019) | Low Risk      | Low Risk      | High Risk    | Low Risk      | Some Concerns | High Risk     |
| <b>Synbiotics</b>                               |               |               |              |               |               |               |
| Ghorbani et al. <sup>7</sup><br>(2018)          | Low Risk      | Low Risk      | Low Risk     | Low Risk      | Low Risk      | Low Risk      |
| Hadi et al. <sup>8</sup><br>(2019)              | Low Risk      | Some Concerns | Low Risk     | Low Risk      | Low Risk      | Some Concerns |
| Haghighat al. <sup>9</sup><br>(2019)            | Low Risk      | Low Risk      | Low Risk     | Low Risk      | Some Concerns | Some Concerns |
| Moludi et al. <sup>27</sup><br>(2021)           | Low Risk      | Low Risk      | Low Risk     | Low Risk      | Low Risk      | Low Risk      |
| Sanchez et al. <sup>42</sup><br>(2017)          | Low Risk      | Low Risk      | High Risk    | Low Risk      | Some Concerns | High Risk     |
| Smith-Ryan et al. <sup>49</sup><br>(2019)       | Some Concerns | Some Concerns | Low Risk     | Low Risk      | Some Concerns | Some Concerns |
| Vidot et al. <sup>52</sup><br>(2019)            | Low Risk      | Low Risk      | Low Risk     | Low Risk      | High Risk     | High Risk     |
| <b>Para-probiotics</b>                          |               |               |              |               |               |               |
| Nishida et al. <sup>57</sup><br>(2017)          | Some Concerns | High Risk     | Low Risk     | High Risk     | High Risk     | High Risk     |
| <b>Fecal Microbiota Transplant</b>              |               |               |              |               |               |               |

Appendix 1, as supplied by the authors. Appendix to: Hofmeister M, Clement F, Patten S, et al. The effect of interventions targeting gut microbiota on depressive symptoms: a systematic review and meta-analysis. *CMAJ Open* 2021. DOI:10.9778/cmajo.20200283. Copyright © 2021 The Author(s) or their employer(s). To receive this resource in an accessible format, please contact us at [cmajgroup@cmaj.ca](mailto:cmajgroup@cmaj.ca).

|                                         |              |             |               |             |               |              |
|-----------------------------------------|--------------|-------------|---------------|-------------|---------------|--------------|
| Lahtinen et al. <sup>18</sup><br>(2020) | High<br>Risk | Low<br>Risk | Some Concerns | Low<br>Risk | Some Concerns | High<br>Risk |
|-----------------------------------------|--------------|-------------|---------------|-------------|---------------|--------------|

## References for Sections 5, 6, and 7

1. Akkasheh G, Kashani-Poor Z, Tajabadi-Ebrahimi M, et al. Clinical and metabolic response to probiotic administration in patients with major depressive disorder: A randomized, double-blind, placebo-controlled trial. *Nutrition*. 2016;32(3):315-320.
2. Browne PD, Bolte AC, Besseling-van der Vaart I, Claassen E, de Weerth C. Probiotics as a treatment for prenatal maternal anxiety and depression: a double-blind randomized pilot trial. *Sci*. 2021;11(1):3051.
3. Chahwan B, Kwan S, Isik A, van Hemert S, Burke C, Roberts L. Gut feelings: A randomised, triple-blind, placebo-controlled trial of probiotics for depressive symptoms. *Journal of Affective Disorders*. 2019;253:317-326.
4. Chong HX, Yusoff I, NAA. Lactobacillus plantarum DR7 alleviates stress and anxiety in adults: a randomised, double-blind, placebo-controlled study. *Beneficial Microbes*. 2019;10(1):19.
5. Chung Y-C, Jin H-M, Cui Y, et al. Fermented milk of Lactobacillus helveticus IDCC3801 improves cognitive functioning during cognitive fatigue tests in healthy older adults. *Journal of Functional Foods*. 2014;10:465-474.
6. Dawe JP, McCowan LME, Wilson J, Okesene-Gafa KAM, Serlachius AS. Probiotics and Maternal Mental Health: A Randomised Controlled Trial among Pregnant Women with Obesity. *Sci*. 2020;10(1):1291.
7. Ghorbani Z, Nazari S, Etesam F, Nourimajd S, Ahmadpanah M, Razeghi Jahromi S. The Effect of Synbiotic as an Adjuvant Therapy to Fluoxetine in Moderate Depression: A Randomized Multicenter Trial. *Arch Neurosci*. 2018;5(2).
8. Hadi A, Sepandi M, Marx W, Moradi S, Parastouei K. Clinical and psychological responses to synbiotic supplementation in obese or overweight adults: A randomized clinical trial. *Complement Ther Med*. 2019;47:102216.
9. Haghighat N, Rajabi S, Mohammadshahi M. Effect of synbiotic and probiotic supplementation on serum brain-derived neurotrophic factor level, depression and anxiety symptoms in hemodialysis patients: a randomized, double-blinded, clinical trial. *Nutr Neurosci*. 2019;1-10.
10. Heidarzadeh-Rad N, Gokmen-Ozel H, Kazemi A, Almasi N, Djafarian K. Effects of a Psychobiotic Supplement on Serum Brain-derived Neurotrophic Factor Levels in Depressive Patients: A Post Hoc Analysis of a Randomized Clinical Trial. *J Neurogastroenterol Motil*. 2020;26(4):486-495.
11. Inoue T, Kobayashi Y, Mori N, et al. Effect of combined bifidobacteria supplementation and resistance training on cognitive function, body composition and bowel habits of healthy elderly subjects. *Beneficial Microbes*. 2018;9(6):843-853.
12. Jamilian M, Mansury S, Bahmani F, Heidar Z, Amirani E, Asemi Z. The effects of probiotic and selenium co-supplementation on parameters of mental health, hormonal profiles, and biomarkers of inflammation and oxidative stress in women with polycystic ovary syndrome. *J Ovarian Res*. 2018;11(1):80.
13. Kazemi A, Noorbala AA, Azam K, Eskandari MH, Djafarian K. Effect of probiotic and prebiotic vs placebo on psychological outcomes in patients with major depressive disorder: A randomized clinical trial. *Clinical Nutrition*. 2019;38(2):522-528.
14. Kelly JR, Allen AP, Temko A, et al. Lost in translation? The potential psychobiotic Lactobacillus rhamnosus (JB-1) fails to modulate stress or cognitive performance in healthy male subjects. *Brain, Behavior, and Immunity*. 2017;61:50-59.
15. Kim CS, Cha L, Sim M, et al. Probiotic Supplementation Improves Cognitive Function and Mood with Changes in Gut Microbiota in Community-Dwelling Older Adults: A Randomized, Double-Blind, Placebo-Controlled, Multicenter Trial. *J Gerontol A Biol Sci Med Sci*. 2021;76(1):32-40.

Appendix 1, as supplied by the authors. Appendix to: Hofmeister M, Clement F, Patten S, et al. The effect of interventions targeting gut microbiota on depressive symptoms: a systematic review and meta-analysis. *CMAJ Open* 2021.

DOI:10.9778/cmajo.20200283. Copyright © 2021 The Author(s) or their employer(s). To receive this resource in an accessible format, please contact us at [cmajgroup@cmaj.ca](mailto:cmajgroup@cmaj.ca).

16. Kouchaki E, Tamtaji OR, Salami M, et al. Clinical and metabolic response to probiotic supplementation in patients with multiple sclerosis: A randomized, double-blind, placebo-controlled trial. *Clinical Nutrition*. 2017;36(5):1245-1249.
17. Lee DS, Kim M, Nam SH, Kang MS, Lee SA. Effects of Oral Probiotics on Subjective Halitosis, Oral Health, and Psychosocial Health of College Students: A Randomized, Double-Blind, Placebo-Controlled Study. *Int J Environ Res Public Health*. 2021;18(3):28.
18. Lahtinen P, Jalanka J, Hartikainen A, et al. Randomised clinical trial: faecal microbiota transplantation versus autologous placebo administered via colonoscopy in irritable bowel syndrome. *Alimentary Pharmacology & Therapeutics*. 2020;51(12):1321-1331.
19. Lew L-C, Hor Y-Y, Yusoff NAA, et al. Probiotic *Lactobacillus plantarum* P8 alleviated stress and anxiety while enhancing memory and cognition in stressed adults: A randomised, double-blind, placebo-controlled study. *Clinical Nutrition*. 2019;38(5):2053-2064.
20. Lyra A, Hillilä M, Huttunen T, et al. Irritable bowel syndrome symptom severity improves equally with probiotic and placebo. *WJG*. 2016;22(48):10631.
21. Majeed M, Nagabhushanam K, Arumugam S, Majeed S, Ali F. *Bacillus coagulans* MTCC 5856 for the management of major depression with irritable bowel syndrome: a randomised, double-blind, placebo controlled, multi-centre, pilot clinical study. *Food & Nutrition Research*. 2018;62(0).
22. Marotta A, Sarno E, Del Casale A, et al. Effects of Probiotics on Cognitive Reactivity, Mood, and Sleep Quality. *Front Psychiatry*. 2019;10:164.
23. Messaoudi M, Lalonde R, Violle N, et al. Assessment of psychotropic-like properties of a probiotic formulation (*Lactobacillus helveticus* R0052 and *Bifidobacterium longum* R0175) in rats and human subjects. *Br J Nutr*. 2011;105(5):755-764.
24. Miyaoka T, Kanayama M, Wake R, et al. *Clostridium butyricum* MIYAIRI 588 as Adjunctive Therapy for Treatment-Resistant Major Depressive Disorder: A Prospective Open-Label Trial. *Clinical Neuropharmacology*. 2018;41(5):151-155.
25. Moloney GM, Long-Smith CM, Murphy A, et al. Improvements in sleep indices during exam stress due to consumption of a *Bifidobacterium longum*. *Brain, Behavior, and Immunity - Health*. 2021;10 (no pagination).
26. Moludi J, Alizadeh M, Mohammadzad MHS, Davari M. The Effect of Probiotic Supplementation on Depressive Symptoms and Quality of Life in Patients After Myocardial Infarction: Results of a Preliminary Double-Blind Clinical Trial. *Psychosom Med*. 2019;81(9):770-777.
27. Moludi J, Khedmatgozar H, Nachvak SM, Abdollahzad H, Moradinazar M, Sadeghpour Tabaei A. The effects of co-administration of probiotics and prebiotics on chronic inflammation, and depression symptoms in patients with coronary artery diseases: a randomized clinical trial. *Nutr Neurosci*. 2021:1-10.
28. Ostadmohammadi V, Jamilian M, Bahmani F, Asemi Z. Vitamin D and probiotic co-supplementation affects mental health, hormonal, inflammatory and oxidative stress parameters in women with polycystic ovary syndrome. *J Ovarian Res*. 2019;12.
29. Östlund-Lagerström L, Kihlgren A, Repsilber D, Björkstén B, Brummer RJ, Schoultz I. Probiotic administration among free-living older adults: a double blinded, randomized, placebo-controlled clinical trial. *Nutr J*. 2015;15(1):80.
30. Papalini S, Michels F, Kohn N, et al. Stress matters: Randomized controlled trial on the effect of probiotics on neurocognition. *Neurobiol Stress*. 2019;10:100141.
31. Patterson E, Griffin SM, Ibarra A, Ellsiepen E, Hellhammer J. *Lactobacillus paracasei* Lpc-37 R improves psychological and physiological markers of stress and anxiety in healthy adults: a



- randomized, double-blind, placebo-controlled and parallel clinical trial (the Sisu study). *Neurobiol Stress*. 2020;13:100277.
32. Pinto-Sanchez MI, Hall GB, Ghajar K, et al. Probiotic *Bifidobacterium longum* NCC3001 Reduces Depression Scores and Alters Brain Activity: A Pilot Study in Patients With Irritable Bowel Syndrome. *Gastroenterology*. 2017;153(2):448-459.e448.
  33. Qi X, Fan G, Jia H. The probiotic *Lactobacillus casei* Shirota attenuates symptoms of vestibular migraine: a randomised placebo-controlled double-blind clinical trial. *Beneficial Microbes*. 2020;11(5):469-476.
  34. Rahimlou M, Hosseini SA, Majdinasab N, Haghhighizadeh MH, Husain D. Effects of long-term administration of Multi-Strain Probiotic on circulating levels of BDNF, NGF, IL-6 and mental health in patients with multiple sclerosis: a randomized, double-blind, placebo-controlled trial. *Nutr Neurosci*. 2020:1-12.
  35. Raygan F, Ostadmohammadi V, Asemi Z. The effects of probiotic and selenium co-supplementation on mental health parameters and metabolic profiles in type 2 diabetic patients with coronary heart disease: A randomized, double-blind, placebo-controlled trial. *Clinical Nutrition*. 2019;38(4):1594-1598.
  36. Raygan F, Ostadmohammadi V, Bahmani F, Asemi Z. The effects of vitamin D and probiotic co-supplementation on mental health parameters and metabolic status in type 2 diabetic patients with coronary heart disease: A randomized, double-blind, placebo-controlled trial. *Progress in Neuro-Psychopharmacology and Biological Psychiatry*. 2018;84:50-55.
  37. Roman P, Estévez AF, Miras A, et al. A Pilot Randomized Controlled Trial to Explore Cognitive and Emotional Effects of Probiotics in Fibromyalgia. *Sci*. 2018;8(1):10965.
  38. Romijn AR, Rucklidge JJ, Kuijter RG, Frampton C. A double-blind, randomized, placebo-controlled trial of *Lactobacillus helveticus* and *Bifidobacterium longum* for the symptoms of depression. *Aust N Z J Psychiatry*. 2017;51(8):810-821.
  39. Rudzki L, Ostrowska L, Pawlak D, et al. Probiotic *Lactobacillus Plantarum* 299v decreases kynurenine concentration and improves cognitive functions in patients with major depression: A double-blind, randomized, placebo controlled study. *Psychoneuroendocrinology*. 2019;100:213-222.
  40. Saccarello A, Montarsolo P, Massardo I, et al. Oral Administration of S-Adenosylmethionine (SAME) and *Lactobacillus Plantarum* HEAL9 Improves the Mild-To-Moderate Symptoms of Depression: A Randomized, Double-Blind, Placebo-Controlled Study. *Prim Care Companion CNS Disord*. 2020;22(4):25.
  41. Salami M, Kouchaki E, Asemi Z, Tamtaji OR. How probiotic bacteria influence the motor and mental behaviors as well as immunological and oxidative biomarkers in multiple sclerosis? A double blind clinical trial. *Journal of Functional Foods*. 2019;52:8-13.
  42. Sanchez M, Darimont C, Panahi S, et al. Effects of a Diet-Based Weight-Reducing Program with Probiotic Supplementation on Satiety Efficiency, Eating Behaviour Traits, and Psychosocial Behaviours in Obese Individuals. *Nutrients*. 2017;9(3):284.
  43. Sawada D, Kawai T, Nishida K, Kuwano Y, Fujiwara S, Rokutan K. Daily intake of *Lactobacillus gasseri* CP2305 improves mental, physical, and sleep quality among Japanese medical students enrolled in a cadaver dissection course. *Journal of Functional Foods*. 2017;31:188-197.
  44. Sawada D, Kuwano Y, Tanaka H, et al. Daily intake of *Lactobacillus gasseri* CP2305 relieves fatigue and stress-related symptoms in male university Ekiden runners: A double-blind, randomized, and placebo-controlled clinical trial. *Journal of Functional Foods*. 2019;57:465-476.

45. Eslami Shahrbabaki M, Sabouri S, Sabahi A, et al. The Efficacy of Probiotics for Treatment of Bipolar Disorder-Type 1: A Randomized, Double-Blind, Placebo Controlled Trial. *Iran*. 2020;15(1):10-16.
46. Silk DBA, Davis A, Vulevic J, Tzortzis G, Gibson GR. Clinical trial: the effects of a trans-galactooligosaccharide prebiotic on faecal microbiota and symptoms in irritable bowel syndrome. *Alimentary Pharmacology & Therapeutics*. 2009;29(5):508-518.
47. Simrén M, Öhman L, Olsson J, et al. Clinical trial: the effect of a fermented milk containing three probiotic bacteria in patients with irritable bowel syndrome (IBS) - a randomized, double-blind, controlled study. *Alimentary Pharmacology & Therapeutics*. 2009.
48. Slykerman RF, Hood F, Wickens K, et al. Effect of *Lactobacillus rhamnosus* HN001 in Pregnancy on Postpartum Symptoms of Depression and Anxiety: A Randomised Double-blind Placebo-controlled Trial. *EBioMedicine*. 2017;24:159-165.
49. Smith-Ryan AE, Mock MG, Trexler ET, Hirsch KR, Blue MNM. Influence of a multistrain probiotic on body composition and mood in female occupational shift workers. *Appl Physiol Nutr Metab*. 2019;44(7):765-773.
50. Steenbergen L, Sellaro R, van Hemert S, Bosch JA, Colzato LS. A randomized controlled trial to test the effect of multispecies probiotics on cognitive reactivity to sad mood. *Brain, Behavior, and Immunity*. 2015;48:258-264.
51. Vaghef-Mehrabany E, Ranjbar F, Asghari-Jafarabadi M, Hosseinpour-Arjmand S, Ebrahimi-Mameghani M. Calorie restriction in combination with prebiotic supplementation in obese women with depression: effects on metabolic and clinical response. *Nutritional Neuroscience*. 2019:1-15.
52. Vidot H, Cvejic E, Finegan LJ, et al. Supplementation with Synbiotics and/or Branched Chain Amino Acids in Hepatic Encephalopathy: A Pilot Randomised Placebo-Controlled Clinical Study. *Nutrients*. 2019;11(8):06.
53. Azpiroz F, Dubray C, Bernalier-Donadille A, et al. Effects of scFOS on the composition of fecal microbiota and anxiety in patients with irritable bowel syndrome: a randomized, double blind, placebo controlled study. *Neurogastroenterol Motil*. 2017;29(2):e12911.
54. Cremon C, Guglielmetti S, Gargari G, et al. Effect of *Lactobacillus paracasei* CNCM I-1572 on symptoms, gut microbiota, short chain fatty acids, and immune activation in patients with irritable bowel syndrome: A pilot randomized clinical trial. *United European Gastroenterology Journal*. 2018;6(4):604-613.
55. Dickerson F, Adamos M, Katsafanas E, et al. Adjunctive probiotic microorganisms to prevent rehospitalization in patients with acute mania: A randomized controlled trial. *Bipolar Disord*. 2018;20(7):614-621.
56. Kato-Kataoka A, Nishida K, Takada M, et al. Fermented milk containing *Lactobacillus casei* strain Shirota prevents the onset of physical symptoms in medical students under academic examination stress. *Beneficial Microbes*. 2016;7(2):153-156.
57. Nishida K, Sawada D, Kawai T, Kuwano Y, Fujiwara S, Rokutan K. Para-psychobiotic *Lactobacillus gasseri* CP 2305 ameliorates stress-related symptoms and sleep quality. *Journal of Applied Microbiology*. 2017;123(6):1561-1570.
58. Rao AV, Bested AC, Beaulne TM, et al. A randomized, double-blind, placebo-controlled pilot study of a probiotic in emotional symptoms of chronic fatigue syndrome. *Gut Pathog*. 2009;1(1):6.
59. Smith AP. The concept of well-being: relevance to nutrition research. *Br J Nutr*. 2005;93(S1):S1-S5.

60. Tillisch K, Labus J, Kilpatrick L, et al. Consumption of Fermented Milk Product With Probiotic Modulates Brain Activity. *Gastroenterology*. 2013;144(7):1394-1401.e1394.
61. Whorwell PJ, Altringer L, Morel J, et al. Efficacy of an Encapsulated Probiotic Bifidobacterium infantis 35624 in Women with Irritable Bowel Syndrome. *Am J Gastroenterol*. 2006;101(7):1581-1590.
62. Wong RK, Yang C, Song G-H, Wong J, Ho K-Y. Melatonin Regulation as a Possible Mechanism for Probiotic (VSL#3) in Irritable Bowel Syndrome: A Randomized Double-Blinded Placebo Study. *Dig Dis Sci*. 2015;60(1):186-194.
